# Supplementary material for: Case—Medication Waste Reduction in an In-Hospital Pharmacy, Part B
Source: Atypon-hosted journal article supplement (doi:10.1287/ited.2015.0147csb), 2016-01-01
Supplement: ited.2015.0147-sm-11-drugsamplepartb.xlsx [file ited.2015.0147-sm-11-drugsamplepartb.xlsx]

## Sheet: Orders
Order ID	Drug ID	Start Date/time	Final Date/time	Duration (Time between doses [in hours])	Cancel Date/time	# of doses redispensed
1	3	2012-01-01 03:55:11	2012-03-01 03:55:00	24	2012-01-02 22:53:39	0
2	1	2012-01-01 04:51:11	2012-03-01 04:51:00	8	2012-01-01 18:01:34	0
3	1	2012-01-01 05:48:05	2012-03-01 05:48:00	8	2012-01-01 23:50:09	0
4	5	2012-01-01 07:00:03	2012-03-01 07:00:00	24	2012-01-05 17:45:56	0
5	8	2012-01-01 08:13:08	2012-03-01 08:13:00	3	2012-01-06 17:32:25	0
6	7	2012-01-01 08:11:28	2012-01-04 01:11:10	24		0
7	1	2012-01-01 08:58:32	2012-03-01 08:58:00	8	2012-01-02 09:12:00	0
8	10	2012-01-01 08:24:23	2012-03-01 08:24:00	1	2012-01-08 18:03:14	4
9	9	2012-01-01 09:17:27	2012-03-01 09:17:00	5	2012-01-04 16:07:41	0
10	9	2012-01-01 09:45:06	2012-03-01 09:45:00	5	2012-01-04 19:28:43	0
11	8	2012-01-01 09:47:39	2012-03-01 09:47:00	3	2012-01-05 13:52:32	1
12	1	2012-01-01 09:16:56	2012-03-01 09:16:00	8	2012-01-01 11:52:26	0
13	4	2012-01-01 09:48:24	2012-03-01 09:48:00	12	2012-01-01 21:41:41	0
14	5	2012-01-01 09:50:26	2012-03-01 09:50:00	24	2012-01-03 10:10:41	0
15	3	2012-01-01 10:15:51	2012-03-01 10:15:00	24	2012-01-03 12:52:57	0
16	2	2012-01-01 10:00:45	2012-03-01 10:00:00	10	2012-01-02 12:03:10	0
17	1	2012-01-01 14:49:06	2012-03-01 14:49:00	8	2012-01-02 09:38:14	0
18	10	2012-01-01 17:32:17	2012-01-05 17:32:00	1		0
19	7	2012-01-01 17:54:50	2012-03-01 17:54:00	24	2012-01-10 21:47:16	0
20	1	2012-01-01 17:17:46	2012-03-01 17:17:00	8	2012-01-01 21:01:25	0
21	3	2012-01-01 17:26:01	2012-03-01 17:26:00	24	2012-01-04 17:58:04	0
22	2	2012-01-01 17:24:11	2012-03-01 17:24:00	10	2012-01-03 07:43:42	0
23	1	2012-01-01 18:29:31	2012-01-04 06:28:54	12		0
24	6	2012-01-01 18:40:10	2012-03-01 18:40:00	24	2012-01-05 13:21:01	0
25	1	2012-01-01 18:31:43	2012-03-01 18:31:00	8	2012-01-02 11:17:33	0
26	1	2012-01-01 20:21:04	2012-03-01 20:21:00	8	2012-01-02 20:11:37	0
27	2	2012-01-01 21:57:15	2012-03-01 21:57:00	10	2012-01-02 01:57:10	0
28	2	2012-01-01 23:15:53	2012-01-04 09:15:03	10		0
29	11	2012-01-02 04:44:19	2012-03-02 04:44:00	1	2012-01-08 21:02:40	4
30	5	2012-01-02 05:23:08	2012-03-02 05:23:00	24	2012-01-07 09:32:35	0
31	7	2012-01-02 06:19:39	2012-01-05 04:18:45	24		0
32	5	2012-01-02 08:46:49	2012-03-02 08:46:00	24	2012-01-05 18:32:34	0
33	5	2012-01-02 09:38:20	2012-01-06 16:38:00	24	2012-01-04 15:45:18	0
34	2	2012-01-02 12:55:35	2012-03-02 12:55:00	10	2012-01-03 14:05:39	0
35	1	2012-01-02 16:44:58	2012-03-02 16:44:00	8	2012-01-03 14:56:08	0
36	1	2012-01-02 16:40:29	2012-03-02 16:40:00	8	2012-01-03 12:34:25	0
37	1	2012-01-02 16:51:38	2012-01-05 08:51:10	12		0
38	1	2012-01-02 16:45:36	2012-03-02 16:45:00	8	2012-01-03 08:22:48	0
39	1	2012-01-02 16:18:43	2012-03-02 16:18:00	8	2012-01-03 08:41:34	0
40	1	2012-01-02 16:35:13	2012-03-02 16:35:00	8	2012-01-03 10:17:38	0
41	11	2012-01-02 17:28:18	2012-01-05 23:27:45	1		4
42	10	2012-01-02 17:34:19	2012-01-06 04:34:08	1		6
43	1	2012-01-02 17:41:05	2012-03-02 17:41:00	12	2012-01-03 07:14:12	0
44	2	2012-01-02 19:05:47	2012-03-02 19:05:00	10	2012-01-05 03:17:08	0
45	5	2012-01-02 20:06:21	2012-03-02 20:06:00	24	2012-01-05 23:17:24	0
46	6	2012-01-02 21:25:56	2012-03-02 21:25:00	24	2012-01-08 13:35:44	0
47	6	2012-01-02 21:23:33	2012-01-07 00:23:11	24		0
48	5	2012-01-02 22:00:14	2012-03-02 22:00:00	24	2012-01-04 17:41:03	0
49	6	2012-01-03 00:50:06	2012-03-03 00:50:00	24	2012-01-16 10:32:08	0
50	6	2012-01-03 00:53:25	2012-03-03 00:53:00	24	2012-01-09 10:50:39	0
51	7	2012-01-03 01:05:52	2012-03-03 01:05:00	24	2012-01-05 23:23:54	0
52	6	2012-01-03 03:29:27	2012-03-03 03:29:00	24	2012-01-08 14:12:53	0
53	1	2012-01-03 05:12:40	2012-03-03 05:12:00	8	2012-01-04 15:49:31	0
54	7	2012-01-03 06:12:58	2012-03-03 06:12:00	24	2012-01-10 14:52:32	0
55	10	2012-01-03 08:25:02	2012-03-03 08:25:00	1	2012-01-10 17:14:43	3
56	2	2012-01-03 08:23:47	2012-03-03 08:23:00	10	2012-01-03 17:39:17	0
57	7	2012-01-03 08:51:00	2012-03-03 08:51:00	24	2012-01-12 09:31:06	0
58	8	2012-01-03 09:57:11	2012-03-03 09:57:00	3	2012-01-06 15:00:21	0
59	9	2012-01-03 09:43:32	2012-03-03 09:43:00	5	2012-01-06 16:24:17	0
60	2	2012-01-03 10:04:19	2012-03-03 10:04:00	10	2012-01-04 10:46:50	0
61	1	2012-01-03 10:02:19	2012-03-03 10:02:00	8	2012-01-03 16:27:51	0
62	2	2012-01-03 10:07:18	2012-01-06 18:07:10	10		0
63	1	2012-01-03 15:01:28	2012-03-03 15:01:00	8	2012-01-04 16:03:28	0
64	2	2012-01-03 16:01:01	2012-03-03 16:01:00	10	2012-01-04 17:39:51	0
65	3	2012-01-03 17:07:34	2012-03-03 17:07:00	24	2012-01-06 10:19:07	0
66	4	2012-01-03 18:15:53	2012-03-03 18:15:00	12	2012-01-05 06:08:58	0
67	8	2012-01-03 18:01:50	2012-03-03 18:01:00	3	2012-01-10 11:16:39	1
68	1	2012-01-03 18:10:58	2012-03-03 18:10:00	12	2012-01-04 07:38:01	0
69	1	2012-01-03 18:01:46	2012-01-07 09:01:24	8		0
70	1	2012-01-03 18:23:15	2012-03-03 18:23:00	12	2012-01-04 13:41:05	0
71	1	2012-01-03 18:20:07	2012-03-03 18:20:00	8	2012-01-04 00:04:08	0
72	3	2012-01-04 05:45:43	2012-03-04 05:45:00	24	2012-01-06 11:45:34	0
73	3	2012-01-04 05:38:02	2012-01-06 10:37:46	24		0
74	4	2012-01-04 08:05:47	2012-03-04 08:05:00	12	2012-01-06 10:11:46	0
75	5	2012-01-04 09:33:17	2012-01-06 22:33:09	24		0
76	1	2012-01-04 11:04:08	2012-03-04 11:04:00	8	2012-01-04 15:20:42	0
77	1	2012-01-04 11:00:32	2012-03-04 11:00:00	12	2012-01-05 09:27:15	0
78	10	2012-01-04 11:31:48	2012-03-04 11:31:00	1	2012-01-11 02:39:04	1
79	3	2012-01-04 12:25:45	2012-03-04 12:25:00	24	2012-01-06 12:48:41	0
80	4	2012-01-04 12:10:41	2012-03-04 12:10:00	12	2012-01-06 12:02:57	0
81	3	2012-01-04 12:00:56	2012-03-04 12:00:00	24	2012-01-06 12:42:27	0
82	2	2012-01-04 12:26:51	2012-01-07 12:26:06	10		0
83	1	2012-01-04 14:40:39	2012-03-04 14:40:00	12	2012-01-05 07:24:25	0
84	4	2012-01-04 14:58:59	2012-03-04 14:59:00	12	2012-01-07 09:15:36	0
85	5	2012-01-04 14:53:18	2012-03-04 14:53:00	24	2012-01-09 20:29:36	0
86	1	2012-01-04 15:55:05	2012-03-04 15:55:00	12	2012-01-05 14:15:09	0
87	5	2012-01-04 16:09:08	2012-01-07 06:08:56	24		0
88	4	2012-01-04 16:24:53	2012-01-07 22:24:00	12	2012-01-06 12:26:41	0
89	7	2012-01-04 16:35:14	2012-03-04 16:35:00	24	2012-02-14 10:11:45	1
90	2	2012-01-04 16:57:49	2012-03-04 16:57:00	10	2012-01-06 10:14:52	0
91	5	2012-01-04 17:26:05	2012-03-04 17:26:00	24	2012-01-08 16:27:30	0
92	1	2012-01-04 18:20:18	2012-03-04 18:20:00	8	2012-01-05 21:07:44	0
93	5	2012-01-04 18:54:46	2012-03-04 18:54:00	24	2012-01-07 11:22:59	0
94	1	2012-01-04 20:45:49	2012-03-04 20:45:00	8	2012-01-05 06:06:19	0
95	1	2012-01-05 00:02:27	2012-01-07 08:01:53	8		0
96	1	2012-01-05 01:35:27	2012-03-05 01:35:00	12	2012-01-06 08:13:24	0
97	6	2012-01-05 02:40:51	2012-03-05 02:40:00	24	2012-01-09 09:04:09	0
98	5	2012-01-05 03:16:55	2012-03-05 03:16:00	24	2012-01-07 04:42:21	0
99	6	2012-01-05 03:48:31	2012-03-05 03:48:00	24	2012-01-12 11:49:28	0
100	5	2012-01-05 05:52:36	2012-03-05 05:52:00	24	2012-01-14 23:45:41	0
101	4	2012-01-05 08:41:29	2012-01-07 15:41:26	12		0
102	7	2012-01-05 08:19:54	2012-01-07 15:19:30	24		0
103	6	2012-01-05 08:32:27	2012-03-05 08:32:00	24	2012-01-09 09:44:54	0
104	4	2012-01-05 10:39:30	2012-03-05 10:39:00	12	2012-01-08 11:02:05	0
105	7	2012-01-05 10:54:00	2012-03-05 10:54:00	24	2012-01-15 15:18:52	0
106	1	2012-01-05 10:49:16	2012-03-05 10:49:00	8	2012-01-05 16:36:09	0
107	5	2012-01-05 13:03:57	2012-03-05 13:03:00	24	2012-01-09 12:42:04	0
108	1	2012-01-05 14:32:08	2012-03-05 14:32:00	12	2012-01-06 18:25:55	0
109	1	2012-01-05 14:45:21	2012-03-05 14:45:00	8	2012-01-05 20:43:48	0
110	3	2012-01-05 15:44:30	2012-03-05 15:44:00	24	2012-01-08 02:06:34	0
111	3	2012-01-05 17:48:20	2012-03-05 17:48:00	24	2012-01-08 11:40:16	0
112	3	2012-01-05 17:18:45	2012-03-05 17:18:00	24	2012-01-08 17:13:49	0
113	1	2012-01-05 18:24:50	2012-03-05 18:24:00	8	2012-01-06 14:21:00	0
114	5	2012-01-05 18:16:40	2012-03-05 18:16:00	24	2012-01-08 14:29:11	0
115	5	2012-01-05 20:03:10	2012-03-05 20:03:00	24	2012-01-08 22:50:28	0
116	2	2012-01-05 21:17:04	2012-03-05 21:17:00	10	2012-01-06 08:37:43	0
117	6	2012-01-05 22:56:35	2012-01-08 04:55:41	24		0
118	5	2012-01-05 23:57:02	2012-01-09 02:56:10	24		0
119	7	2012-01-06 01:25:27	2012-01-08 17:24:59	24		0
120	5	2012-01-06 03:13:07	2012-03-06 03:13:00	24	2012-01-08 15:24:26	0
121	3	2012-01-06 05:29:27	2012-03-06 05:29:00	24	2012-01-09 11:14:34	0
122	10	2012-01-06 06:07:18	2012-01-08 22:06:51	1		1
123	1	2012-01-06 06:28:13	2012-03-06 06:28:00	12	2012-01-07 14:48:03	0
124	8	2012-01-06 09:58:55	2012-03-06 09:58:00	3	2012-01-10 02:02:14	2
125	5	2012-01-06 09:02:20	2012-03-06 09:02:00	24	2012-01-08 13:30:41	0
126	9	2012-01-06 09:08:58	2012-03-06 09:08:00	5	2012-01-09 13:50:38	0
127	9	2012-01-06 09:11:09	2012-03-06 09:11:00	5	2012-01-09 08:49:16	0
128	1	2012-01-06 09:24:44	2012-03-06 09:24:00	8	2012-01-07 13:49:08	0
129	1	2012-01-06 10:58:37	2012-03-06 10:58:00	8	2012-01-06 14:47:53	0
130	7	2012-01-06 13:32:49	2012-03-06 13:32:00	24	2012-01-22 11:44:59	0
131	3	2012-01-06 14:18:29	2012-03-06 14:18:00	24	2012-01-09 15:01:36	0
132	1	2012-01-06 14:25:02	2012-01-10 14:24:50	8		0
133	1	2012-01-06 14:50:34	2012-03-06 14:50:00	12	2012-01-07 13:08:16	0
134	2	2012-01-06 16:12:05	2012-01-09 01:11:48	10		0
135	6	2012-01-06 17:54:03	2012-03-06 17:54:00	24	2012-01-12 10:01:47	0
136	1	2012-01-06 17:43:26	2012-03-06 17:43:00	8	2012-01-07 16:16:40	0
137	2	2012-01-06 17:22:45	2012-03-06 17:22:00	10	2012-01-07 10:17:41	0
138	10	2012-01-06 17:58:32	2012-01-09 11:58:15	1		3
139	3	2012-01-06 17:07:40	2012-03-06 17:07:00	24	2012-01-09 21:39:53	0
140	1	2012-01-06 18:28:23	2012-03-06 18:28:00	12	2012-01-07 08:51:55	0
141	6	2012-01-06 20:26:47	2012-03-06 20:26:00	24	2012-01-17 10:00:55	0
142	5	2012-01-06 20:41:06	2012-03-06 20:41:00	24	2012-01-08 23:34:34	0
143	4	2012-01-06 21:14:27	2012-01-11 18:14:00	12	2012-01-08 18:10:32	0
144	1	2012-01-07 01:47:44	2012-03-07 01:47:00	12	2012-01-08 14:39:49	0
145	1	2012-01-07 01:27:53	2012-03-07 01:27:00	8	2012-01-07 18:27:51	0
146	11	2012-01-07 06:37:49	2012-03-07 06:37:00	1	2012-01-14 13:23:44	4
147	5	2012-01-07 08:36:03	2012-03-07 08:36:00	24	2012-01-09 17:04:30	0
148	1	2012-01-07 09:44:09	2012-01-09 14:43:43	8		0
149	1	2012-01-07 09:50:27	2012-03-07 09:50:00	8	2012-01-08 11:53:53	0
150	3	2012-01-07 10:30:26	2012-03-07 10:30:00	24	2012-01-09 18:20:47	0
151	4	2012-01-07 10:27:29	2012-01-10 04:27:12	12		0
152	4	2012-01-07 10:08:26	2012-03-07 10:08:00	12	2012-01-10 11:02:48	0
153	2	2012-01-07 11:58:16	2012-01-10 12:58:00	10	2012-01-08 18:05:18	0
154	4	2012-01-07 12:02:06	2012-03-07 12:02:00	12	2012-01-10 12:28:55	0
155	4	2012-01-07 14:54:14	2012-03-07 14:54:00	12	2012-01-11 11:53:49	0
156	2	2012-01-07 14:24:05	2012-03-07 14:24:00	10	2012-01-08 11:12:38	0
157	2	2012-01-07 14:07:02	2012-03-07 14:07:00	10	2012-01-09 07:31:43	0
158	1	2012-01-07 15:14:55	2012-03-07 15:14:00	8	2012-01-07 17:11:01	0
159	5	2012-01-07 16:10:11	2012-03-07 16:10:00	24	2012-01-11 21:46:08	0
160	3	2012-01-07 17:54:33	2012-03-07 17:54:00	24	2012-01-10 12:01:42	0
161	3	2012-01-07 17:02:08	2012-03-07 17:02:00	24	2012-01-10 09:45:58	0
162	6	2012-01-07 18:20:57	2012-03-07 18:20:00	24	2012-01-11 07:51:49	0
163	7	2012-01-07 18:07:43	2012-03-07 18:07:00	24	2012-01-13 12:45:38	0
164	7	2012-01-07 19:22:24	2012-03-07 19:22:00	24	2012-01-16 16:00:08	0
165	7	2012-01-07 19:36:28	2012-03-07 19:36:00	24	2012-01-16 13:23:51	0
166	5	2012-01-07 20:51:19	2012-03-07 20:51:00	24	2012-01-10 12:55:28	0
167	1	2012-01-07 20:28:08	2012-01-09 21:27:47	12		0
168	6	2012-01-07 21:51:26	2012-03-07 21:51:00	24	2012-01-11 21:29:26	0
169	6	2012-01-07 23:07:53	2012-03-07 23:07:00	24	2012-01-14 16:32:22	0
170	6	2012-01-08 00:17:43	2012-03-08 00:17:00	24	2012-01-31 00:35:48	0
171	3	2012-01-08 00:55:07	2012-03-08 00:55:00	24	2012-01-10 12:05:49	0
172	7	2012-01-08 01:22:36	2012-03-08 01:22:00	24	2012-01-17 10:38:53	0
173	1	2012-01-08 01:29:14	2012-01-11 11:29:00	12	2012-01-09 09:47:26	0
174	7	2012-01-08 01:16:12	2012-03-08 01:16:00	24	2012-01-17 08:25:37	0
175	6	2012-01-08 03:06:07	2012-03-08 03:06:00	24	2012-01-14 11:41:15	0
176	1	2012-01-08 05:05:20	2012-01-10 18:04:21	12		0
177	2	2012-01-08 06:58:04	2012-01-11 03:57:40	10		0
178	3	2012-01-08 08:00:45	2012-03-08 08:00:00	24	2012-01-10 17:36:47	0
179	3	2012-01-08 09:09:56	2012-03-08 09:09:00	24	2012-01-09 13:52:02	0
180	1	2012-01-08 12:51:23	2012-03-08 12:51:00	8	2012-01-09 12:12:42	0
181	6	2012-01-08 12:04:24	2012-03-08 12:04:00	24	2012-01-14 14:38:29	0
182	7	2012-01-08 12:47:12	2012-03-08 12:47:00	24	2012-01-28 16:30:05	0
183	4	2012-01-08 13:11:24	2012-03-08 13:11:00	12	2012-01-11 00:15:25	0
184	6	2012-01-08 13:38:15	2012-03-08 13:38:00	24	2012-01-15 11:51:37	0
185	4	2012-01-08 13:16:11	2012-03-08 13:16:00	12	2012-01-11 15:46:06	0
186	1	2012-01-08 13:52:49	2012-03-08 13:52:00	12	2012-01-09 10:52:40	0
187	3	2012-01-08 14:17:22	2012-03-08 14:17:00	24	2012-01-11 18:16:45	0
188	4	2012-01-08 15:04:13	2012-03-08 15:04:00	12	2012-01-12 20:51:57	0
189	5	2012-01-08 15:22:06	2012-03-08 15:22:00	24	2012-01-12 09:21:17	0
190	5	2012-01-08 16:28:53	2012-03-08 16:28:00	24	2012-01-13 12:02:03	0
191	1	2012-01-08 17:29:45	2012-01-12 09:28:52	8		0
192	5	2012-01-08 18:23:41	2012-03-08 18:23:00	24	2012-01-11 12:14:49	0
193	2	2012-01-08 19:27:53	2012-03-08 19:27:00	10	2012-01-11 09:05:20	0
194	1	2012-01-08 20:33:32	2012-03-08 20:33:00	12	2012-01-10 10:15:20	0
195	5	2012-01-08 20:11:04	2012-03-08 20:11:00	24	2012-01-10 20:52:19	0
196	4	2012-01-08 21:28:03	2012-03-08 21:28:00	12	2012-01-11 08:20:17	0
197	2	2012-01-08 21:50:40	2012-03-08 21:50:00	10	2012-01-09 18:23:21	0
198	5	2012-01-08 23:37:35	2012-03-08 23:37:00	24	2012-01-10 08:12:16	0
199	3	2012-01-09 00:46:49	2012-03-09 00:46:00	24	2012-01-12 08:09:04	0
200	2	2012-01-09 08:55:22	2012-03-09 08:55:00	10	2012-01-09 11:05:03	0
201	7	2012-01-09 08:58:50	2012-03-09 08:58:00	24	2012-01-18 10:36:26	0
202	11	2012-01-09 08:54:26	2012-03-09 08:54:00	1	2012-01-16 15:17:32	1
203	8	2012-01-09 09:05:22	2012-01-11 10:05:01	3		0
204	8	2012-01-09 09:04:28	2012-03-09 09:04:00	3	2012-01-13 15:28:02	3
205	5	2012-01-09 09:23:51	2012-03-09 09:23:00	24	2012-01-11 15:07:15	0
206	7	2012-01-09 09:27:37	2012-01-13 15:26:38	24		0
207	8	2012-01-09 09:52:45	2012-03-09 09:52:00	3	2012-01-13 13:55:37	1
208	1	2012-01-09 09:41:59	2012-03-09 09:42:00	8	2012-01-10 14:25:45	0
209	3	2012-01-09 10:42:06	2012-03-09 10:42:00	24	2012-01-11 12:25:51	0
210	2	2012-01-09 10:37:20	2012-03-09 10:37:00	10	2012-01-10 12:48:39	0
211	4	2012-01-09 11:21:08	2012-03-09 11:21:00	12	2012-01-11 11:39:10	0
212	2	2012-01-09 11:14:58	2012-03-09 11:14:00	10	2012-01-10 09:08:46	0
213	1	2012-01-09 12:03:25	2012-03-09 12:03:00	8	2012-01-09 16:22:19	0
214	3	2012-01-09 13:29:30	2012-03-09 13:29:00	24	2012-01-11 10:19:40	0
215	1	2012-01-09 14:05:51	2012-03-09 14:05:00	8	2012-01-10 15:29:22	0
216	1	2012-01-09 14:54:48	2012-03-09 14:54:00	8	2012-01-10 09:12:17	0
217	4	2012-01-09 16:06:50	2012-03-09 16:06:00	12	2012-01-12 18:21:52	0
218	1	2012-01-09 17:28:02	2012-03-09 17:28:00	8	2012-01-10 21:26:41	0
219	1	2012-01-09 18:26:20	2012-03-09 18:26:00	12	2012-01-10 14:29:27	0
220	5	2012-01-09 21:13:28	2012-03-09 21:13:00	24	2012-01-12 20:56:14	0
221	6	2012-01-10 00:18:53	2012-03-10 00:18:00	24	2012-01-14 14:20:33	0
222	6	2012-01-10 03:31:14	2012-01-12 23:30:35	24		0
223	11	2012-01-10 04:07:26	2012-03-10 04:07:00	1	2012-01-14 10:49:28	0
224	3	2012-01-10 05:00:34	2012-03-10 05:00:00	24	2012-01-12 09:16:25	0
225	1	2012-01-10 06:35:33	2012-03-10 06:35:00	8	2012-01-11 11:34:25	0
226	8	2012-01-10 09:20:07	2012-03-10 09:20:00	3	2012-01-14 11:42:58	0
227	8	2012-01-10 09:01:56	2012-03-10 09:01:00	3	2012-01-15 13:26:53	0
228	6	2012-01-10 09:05:07	2012-03-10 09:05:00	24	2012-01-12 11:20:10	0
229	2	2012-01-10 10:18:23	2012-03-10 10:18:00	10	2012-01-11 09:33:03	0
230	3	2012-01-10 10:30:16	2012-03-10 10:30:00	24	2012-01-12 12:07:24	0
231	1	2012-01-10 10:11:48	2012-03-10 10:11:00	8	2012-01-11 09:32:40	0
232	3	2012-01-10 11:12:38	2012-03-10 11:12:00	24	2012-01-12 08:51:47	0
233	1	2012-01-10 12:33:21	2012-03-10 12:33:00	8	2012-01-10 16:34:00	0
234	1	2012-01-10 13:04:53	2012-03-10 13:04:00	12	2012-01-11 14:57:53	0
235	3	2012-01-10 15:57:24	2012-03-10 15:57:00	24	2012-01-13 09:53:38	0
236	1	2012-01-10 18:30:47	2012-03-10 18:30:00	12	2012-01-11 11:44:31	0
237	6	2012-01-10 20:27:26	2012-03-10 20:27:00	24	2012-01-21 16:24:10	1
238	1	2012-01-10 20:25:04	2012-03-10 20:25:00	12	2012-01-11 20:25:44	0
239	10	2012-01-10 22:26:57	2012-03-10 22:26:00	1	2012-01-17 21:54:37	3
240	6	2012-01-10 23:33:26	2012-03-10 23:33:00	24	2012-01-29 22:54:06	0
241	5	2012-01-10 23:16:30	2012-03-10 23:16:00	24	2012-01-12 16:26:32	0
242	5	2012-01-10 23:01:12	2012-03-10 23:01:00	24	2012-01-13 13:46:28	0
243	1	2012-01-11 01:28:59	2012-03-11 01:28:00	12	2012-01-12 09:33:32	0
244	6	2012-01-11 03:28:23	2012-03-11 03:28:00	24	2012-01-23 11:15:19	0
245	3	2012-01-11 03:31:13	2012-03-11 03:31:00	24	2012-01-12 07:22:44	0
246	5	2012-01-11 05:23:19	2012-03-11 05:23:00	24	2012-02-02 10:58:16	0
247	1	2012-01-11 05:08:38	2012-03-11 05:08:00	12	2012-01-12 10:26:04	0
248	7	2012-01-11 07:50:09	2012-01-14 19:49:24	24		0
249	4	2012-01-11 08:33:35	2012-01-14 04:33:00	12	2012-01-13 13:29:18	0
250	8	2012-01-11 09:03:37	2012-03-11 09:03:00	3	2012-01-14 21:20:13	1
251	5	2012-01-11 09:03:37	2012-03-11 09:03:00	24	2012-01-13 08:45:31	0
252	1	2012-01-11 09:50:23	2012-03-11 09:50:00	8	2012-01-12 12:44:49	0
253	1	2012-01-11 14:00:42	2012-03-11 14:00:00	8	2012-01-11 20:48:40	0
254	1	2012-01-11 17:01:07	2012-01-16 03:01:00	8	2012-01-12 10:51:43	0
255	2	2012-01-11 17:26:15	2012-03-11 17:26:00	10	2012-01-12 18:31:21	0
256	1	2012-01-11 17:28:03	2012-01-14 19:27:54	12		0
257	1	2012-01-11 18:20:08	2012-03-11 18:20:00	8	2012-01-12 18:49:12	0
258	4	2012-01-11 19:05:58	2012-01-13 22:05:48	12		0
259	1	2012-01-11 19:12:09	2012-01-14 08:11:10	12		0
260	6	2012-01-11 20:44:15	2012-03-11 20:44:00	24	2012-01-17 14:04:35	0
261	6	2012-01-11 21:40:45	2012-03-11 21:40:00	24	2012-01-15 14:43:35	0
262	4	2012-01-12 02:43:56	2012-03-12 02:43:00	12	2012-01-15 09:49:26	0
263	1	2012-01-12 10:49:22	2012-03-12 10:49:00	8	2012-01-12 16:18:59	0
264	1	2012-01-12 10:03:27	2012-03-12 10:03:00	8	2012-01-12 14:30:49	0
265	3	2012-01-12 10:19:24	2012-03-12 10:19:00	24	2012-01-14 10:39:42	0
266	1	2012-01-12 12:55:43	2012-03-12 12:55:00	8	2012-01-13 21:42:07	0
267	7	2012-01-12 12:04:52	2012-03-12 12:04:00	24	2012-02-01 09:35:02	0
268	1	2012-01-12 14:18:12	2012-03-12 14:18:00	8	2012-01-12 18:15:37	0
269	1	2012-01-12 14:04:32	2012-03-12 14:04:00	12	2012-01-13 17:28:53	0
270	2	2012-01-12 16:43:14	2012-03-12 16:43:00	10	2012-01-14 12:36:03	0
271	2	2012-01-12 17:34:57	2012-03-12 17:34:00	10	2012-01-13 15:08:27	0
272	1	2012-01-12 18:19:05	2012-03-12 18:19:00	8	2012-01-13 11:49:45	0
273	1	2012-01-12 18:04:12	2012-03-12 18:04:00	8	2012-01-13 07:38:58	0
274	1	2012-01-12 18:05:49	2012-01-15 04:04:51	8		0
275	4	2012-01-12 19:46:44	2012-03-12 19:46:00	12	2012-01-15 08:03:48	0
276	1	2012-01-12 20:56:56	2012-03-12 20:56:00	12	2012-01-13 13:27:54	0
277	4	2012-01-12 21:09:35	2012-03-12 21:09:00	12	2012-01-14 13:46:24	0
278	1	2012-01-12 23:41:48	2012-03-12 23:41:00	8	2012-01-13 11:27:46	0
279	7	2012-01-13 01:26:29	2012-03-13 01:26:00	24	2012-01-17 12:03:42	0
280	3	2012-01-13 03:27:50	2012-03-13 03:27:00	24	2012-01-14 22:24:51	0
281	1	2012-01-13 06:12:39	2012-03-13 06:12:00	12	2012-01-14 16:54:09	0
282	2	2012-01-13 06:49:06	2012-03-13 06:49:00	10	2012-01-15 15:48:06	0
283	11	2012-01-13 07:55:34	2012-01-15 17:55:00	1		1
284	6	2012-01-13 08:58:05	2012-03-13 08:58:00	24	2012-01-17 08:22:17	0
285	6	2012-01-13 08:53:17	2012-03-13 08:53:00	24	2012-01-17 08:38:08	0
286	2	2012-01-13 12:51:27	2012-03-13 12:51:00	10	2012-01-14 12:26:28	0
287	1	2012-01-13 12:48:14	2012-03-13 12:48:00	8	2012-01-14 09:41:00	0
288	6	2012-01-13 12:58:47	2012-03-13 12:58:00	24	2012-01-20 16:44:28	0
289	4	2012-01-13 13:26:19	2012-01-17 01:25:26	12		0
290	6	2012-01-13 13:25:53	2012-03-13 13:25:00	24	2012-01-19 10:33:30	0
291	1	2012-01-13 14:42:40	2012-03-13 14:42:00	8	2012-01-14 11:35:28	0
292	4	2012-01-13 14:24:05	2012-01-15 15:23:32	12		0
293	1	2012-01-13 14:28:21	2012-03-13 14:28:00	12	2012-01-14 09:30:40	0
294	4	2012-01-13 15:04:39	2012-03-13 15:04:00	12	2012-01-16 07:36:39	0
295	7	2012-01-13 15:34:41	2012-03-13 15:34:00	24	2012-02-04 07:41:34	0
296	4	2012-01-13 15:22:00	2012-01-16 01:21:02	12		0
297	4	2012-01-13 16:39:42	2012-03-13 16:39:00	12	2012-01-16 09:21:02	0
298	1	2012-01-13 17:10:14	2012-01-16 19:10:00	8	2012-01-14 12:27:27	0
299	1	2012-01-13 17:19:36	2012-03-13 17:19:00	12	2012-01-14 09:08:04	0
300	1	2012-01-13 19:24:51	2012-03-13 19:24:00	8	2012-01-14 03:23:12	0
301	4	2012-01-13 19:20:11	2012-03-13 19:20:00	12	2012-01-17 16:54:04	0
302	6	2012-01-13 20:56:16	2012-03-13 20:56:00	24	2012-01-17 12:20:58	0
303	7	2012-01-14 01:15:40	2012-03-14 01:15:00	24	2012-01-20 23:26:03	0
304	7	2012-01-14 01:00:29	2012-03-14 01:00:00	24	2012-01-30 06:53:27	0
305	3	2012-01-14 03:10:49	2012-03-14 03:10:00	24	2012-01-16 14:46:11	0
306	5	2012-01-14 03:48:05	2012-01-16 14:47:27	24		0
307	6	2012-01-14 04:02:03	2012-03-14 04:02:00	24	2012-01-15 10:14:30	0
308	5	2012-01-14 05:06:30	2012-01-17 01:05:50	24		0
309	7	2012-01-14 06:11:31	2012-03-14 06:11:00	24	2012-01-18 09:49:51	0
310	2	2012-01-14 10:37:52	2012-03-14 10:37:00	10	2012-01-15 16:58:39	0
311	1	2012-01-14 11:42:31	2012-03-14 11:42:00	12	2012-01-15 11:11:22	0
312	1	2012-01-14 11:55:00	2012-01-17 00:54:52	8		0
313	1	2012-01-14 11:58:31	2012-01-16 13:57:53	8		0
314	7	2012-01-14 13:05:54	2012-03-14 13:05:00	24	2012-02-24 15:58:36	0
315	3	2012-01-14 14:46:16	2012-03-14 14:46:00	24	2012-01-17 09:16:25	0
316	11	2012-01-14 14:56:47	2012-03-14 14:56:00	1	2012-01-21 15:43:26	2
317	6	2012-01-14 14:55:39	2012-03-14 14:55:00	24	2012-01-21 19:42:03	0
318	6	2012-01-14 15:24:54	2012-03-14 15:24:00	24	2012-01-26 19:51:16	0
319	6	2012-01-14 16:48:06	2012-03-14 16:48:00	24	2012-01-21 14:56:08	0
320	1	2012-01-14 17:31:13	2012-03-14 17:31:00	8	2012-01-14 21:16:21	0
321	1	2012-01-14 19:19:56	2012-03-14 19:19:00	8	2012-01-15 03:52:46	0
322	1	2012-01-14 19:23:10	2012-03-14 19:23:00	8	2012-01-15 08:45:03	0
323	2	2012-01-14 19:29:32	2012-03-14 19:29:00	10	2012-01-16 09:15:16	0
324	6	2012-01-14 21:13:41	2012-03-14 21:13:00	24	2012-01-20 09:31:03	0
325	2	2012-01-14 23:41:21	2012-03-14 23:41:00	10	2012-01-15 22:40:45	0
326	3	2012-01-15 00:23:19	2012-03-15 00:23:00	24	2012-01-18 09:30:42	0
327	6	2012-01-15 00:09:31	2012-03-15 00:09:00	24	2012-01-19 10:32:18	0
328	1	2012-01-15 01:55:24	2012-03-15 01:55:00	12	2012-01-17 12:23:41	0
329	10	2012-01-15 04:03:28	2012-03-15 04:03:00	1	2012-01-17 23:53:31	0
330	3	2012-01-15 07:16:51	2012-03-15 07:16:00	24	2012-01-17 16:21:49	0
331	1	2012-01-15 08:01:05	2012-01-18 10:01:00	8	2012-01-16 09:31:57	0
332	9	2012-01-15 09:05:29	2012-03-15 09:05:00	5	2012-01-18 15:53:59	0
333	1	2012-01-15 09:03:28	2012-03-15 09:03:00	8	2012-01-16 14:48:14	0
334	5	2012-01-15 12:28:02	2012-03-15 12:28:00	24	2012-01-19 11:05:35	0
335	2	2012-01-15 12:28:39	2012-03-15 12:28:00	10	2012-01-16 09:39:43	0
336	7	2012-01-15 12:29:00	2012-03-15 12:29:00	24	2012-01-25 09:57:06	0
337	6	2012-01-15 12:02:51	2012-03-15 12:02:00	24	2012-01-22 04:52:36	0
338	4	2012-01-15 13:02:28	2012-03-15 13:02:00	12	2012-01-19 00:16:11	0
339	2	2012-01-15 14:51:28	2012-01-18 15:50:32	10		0
340	2	2012-01-15 14:56:05	2012-01-18 03:55:05	10		0
341	7	2012-01-15 14:30:57	2012-03-15 14:30:00	24	2012-02-04 18:15:01	1
342	1	2012-01-15 15:56:10	2012-01-18 12:55:45	8		0
343	3	2012-01-15 16:56:04	2012-03-15 16:56:00	24	2012-01-18 20:20:04	0
344	8	2012-01-15 18:29:28	2012-03-15 18:29:00	3	2012-01-20 21:07:44	0
345	3	2012-01-15 18:40:48	2012-03-15 18:40:00	24	2012-01-17 07:04:33	0
346	4	2012-01-15 18:04:08	2012-03-15 18:04:00	12	2012-01-17 06:51:12	0
347	1	2012-01-15 18:38:49	2012-01-19 18:38:37	8		0
348	1	2012-01-15 18:53:30	2012-03-15 18:53:00	8	2012-01-15 21:11:15	0
349	8	2012-01-15 18:53:10	2012-03-15 18:53:00	3	2012-01-20 08:13:30	0
350	2	2012-01-15 19:42:00	2012-01-17 20:41:52	10		0
351	7	2012-01-15 21:54:07	2012-01-18 10:54:00	24		0
352	6	2012-01-15 22:30:37	2012-03-15 22:30:00	24	2012-01-17 11:37:57	0
353	5	2012-01-15 23:51:32	2012-01-18 20:50:36	24		0
354	1	2012-01-16 01:42:14	2012-03-16 01:42:00	8	2012-01-17 10:05:58	0
355	11	2012-01-16 04:54:43	2012-01-19 04:53:59	1		3
356	3	2012-01-16 07:16:37	2012-03-16 07:16:00	24	2012-01-18 16:02:21	0
357	2	2012-01-16 08:12:01	2012-03-16 08:12:00	10	2012-01-16 10:54:19	0
358	4	2012-01-16 08:42:16	2012-03-16 08:42:00	12	2012-01-18 13:12:14	0
359	4	2012-01-16 08:23:44	2012-03-16 08:23:00	12	2012-01-18 09:50:27	0
360	9	2012-01-16 09:18:26	2012-01-19 20:17:30	5		0
361	1	2012-01-16 09:49:23	2012-03-16 09:49:00	8	2012-01-16 18:10:28	0
362	6	2012-01-16 10:18:13	2012-03-16 10:18:00	24	2012-01-23 09:23:12	0
363	5	2012-01-16 10:02:58	2012-03-16 10:02:00	24	2012-01-20 15:38:58	0
364	3	2012-01-16 10:02:17	2012-03-16 10:02:00	24	2012-01-18 12:12:38	0
365	5	2012-01-16 10:29:53	2012-03-16 10:29:00	24	2012-01-20 16:28:26	0
366	1	2012-01-16 11:10:11	2012-01-18 13:09:33	12		0
367	3	2012-01-16 12:46:05	2012-03-16 12:46:00	24	2012-01-18 13:37:22	0
368	4	2012-01-16 14:32:32	2012-03-16 14:32:00	12	2012-01-20 11:54:38	0
369	5	2012-01-16 16:03:56	2012-03-16 16:03:00	24	2012-01-20 12:52:47	0
370	2	2012-01-16 17:57:23	2012-01-19 09:57:04	10		0
371	6	2012-01-16 20:42:22	2012-03-16 20:42:00	24	2012-01-27 10:44:44	0
372	6	2012-01-16 22:31:27	2012-03-16 22:31:00	24	2012-01-19 17:21:31	0
373	1	2012-01-17 00:20:49	2012-03-17 00:20:00	12	2012-01-18 10:04:01	0
374	1	2012-01-17 00:18:27	2012-03-17 00:18:00	12	2012-01-17 18:03:22	0
375	7	2012-01-17 01:19:00	2012-03-17 01:19:00	24	2012-01-20 08:37:09	0
376	1	2012-01-17 04:58:33	2012-03-17 04:58:00	8	2012-01-17 12:32:19	0
377	5	2012-01-17 07:54:23	2012-01-20 04:54:00	24	2012-01-19 21:23:19	0
378	3	2012-01-17 08:48:52	2012-01-21 08:48:40	24		0
379	2	2012-01-17 08:18:30	2012-03-17 08:18:00	10	2012-01-17 17:22:08	0
380	1	2012-01-17 08:36:30	2012-03-17 08:36:00	8	2012-01-17 15:53:55	0
381	7	2012-01-17 09:46:35	2012-03-17 09:46:00	24	2012-01-20 16:21:37	0
382	1	2012-01-17 09:14:46	2012-03-17 09:14:00	8	2012-01-17 12:43:41	0
383	5	2012-01-17 11:21:16	2012-03-17 11:21:00	24	2012-01-21 10:57:57	0
384	1	2012-01-17 12:31:19	2012-01-19 13:30:46	8		0
385	7	2012-01-17 12:44:22	2012-03-17 12:44:00	24	2012-02-02 12:12:10	0
386	3	2012-01-17 14:26:08	2012-03-17 14:26:00	24	2012-01-20 15:30:06	0
387	1	2012-01-17 15:36:29	2012-01-20 11:35:36	12		0
388	2	2012-01-17 16:54:47	2012-03-17 16:54:00	10	2012-01-18 22:44:59	0
389	6	2012-01-17 16:09:11	2012-03-17 16:09:00	24	2012-01-24 13:43:50	0
390	1	2012-01-17 18:36:22	2012-03-17 18:36:00	12	2012-01-18 08:05:46	0
391	1	2012-01-17 18:06:29	2012-03-17 18:06:00	8	2012-01-17 21:17:55	0
392	6	2012-01-17 18:48:45	2012-03-17 18:48:00	24	2012-01-21 13:10:53	0
393	6	2012-01-17 20:07:58	2012-03-17 20:07:00	24	2012-01-23 14:45:17	0
394	4	2012-01-17 21:37:36	2012-03-17 21:37:00	12	2012-01-19 21:18:38	0
395	1	2012-01-17 23:36:07	2012-03-17 23:36:00	8	2012-01-18 11:44:10	0
396	7	2012-01-18 01:46:19	2012-03-18 01:46:00	24	2012-01-21 12:35:16	0
397	5	2012-01-18 03:55:38	2012-03-18 03:55:00	24	2012-01-22 11:11:52	0
398	3	2012-01-18 08:37:45	2012-01-20 22:37:31	24		0
399	6	2012-01-18 09:12:23	2012-03-18 09:12:00	24	2012-01-21 15:19:11	0
400	5	2012-01-18 09:36:07	2012-01-22 12:35:18	24		0
401	9	2012-01-18 09:51:23	2012-03-18 09:51:00	5	2012-01-21 11:54:24	0
402	3	2012-01-18 09:38:07	2012-03-18 09:38:00	24	2012-01-19 15:16:37	0
403	9	2012-01-18 09:24:04	2012-03-18 09:24:00	5	2012-01-21 15:16:25	0
404	1	2012-01-18 09:16:32	2012-03-18 09:16:00	8	2012-01-18 11:25:03	0
405	8	2012-01-18 09:08:04	2012-01-23 00:07:30	3		0
406	3	2012-01-18 14:11:36	2012-03-18 14:11:00	24	2012-01-21 18:07:45	0
407	2	2012-01-18 17:32:40	2012-03-18 17:32:00	10	2012-01-19 10:36:00	0
408	2	2012-01-18 17:26:37	2012-03-18 17:26:00	10	2012-01-20 10:56:51	0
409	1	2012-01-18 18:56:31	2012-01-22 19:55:44	12		0
410	7	2012-01-18 21:28:47	2012-03-18 21:28:00	24	2012-02-03 18:27:01	0
411	2	2012-01-18 21:30:22	2012-01-21 17:29:42	10		0
412	11	2012-01-18 22:13:37	2012-03-18 22:13:00	1	2012-01-25 18:56:40	1
413	1	2012-01-19 01:49:53	2012-03-19 01:49:00	8	2012-01-20 06:00:51	0
414	3	2012-01-19 02:43:10	2012-03-19 02:43:00	24	2012-01-20 18:52:13	0
415	3	2012-01-19 02:27:01	2012-03-19 02:27:00	24	2012-01-20 15:19:56	0
416	1	2012-01-19 09:42:30	2012-03-19 09:42:00	8	2012-01-19 11:11:26	0
417	3	2012-01-19 10:52:47	2012-03-19 10:52:00	24	2012-01-21 12:29:16	0
418	11	2012-01-19 10:02:52	2012-01-21 11:02:43	1		4
419	1	2012-01-19 11:35:35	2012-03-19 11:35:00	8	2012-01-20 13:14:17	0
420	1	2012-01-19 11:48:01	2012-03-19 11:48:00	8	2012-01-20 08:54:44	0
421	1	2012-01-19 11:20:56	2012-03-19 11:20:00	8	2012-01-20 17:28:51	0
422	1	2012-01-19 11:25:16	2012-01-22 12:25:00	8		0
423	3	2012-01-19 12:50:11	2012-03-19 12:50:00	24	2012-01-21 12:22:16	0
424	1	2012-01-19 12:58:20	2012-01-22 23:58:10	8		0
425	1	2012-01-19 15:50:51	2012-01-23 06:50:49	8		0
426	4	2012-01-19 15:23:40	2012-03-19 15:23:00	12	2012-01-23 12:40:29	0
427	3	2012-01-19 15:56:58	2012-01-21 21:56:05	24		0
428	1	2012-01-19 16:04:12	2012-03-19 16:04:00	8	2012-01-20 10:28:43	0
429	1	2012-01-19 17:04:13	2012-01-22 19:04:04	12		0
430	7	2012-01-19 19:05:32	2012-03-19 19:05:00	24	2012-01-28 16:54:55	0
431	2	2012-01-19 19:52:39	2012-03-19 19:52:00	10	2012-01-22 17:22:42	0
432	1	2012-01-19 21:31:01	2012-03-19 21:31:00	8	2012-01-20 01:00:30	0
433	1	2012-01-20 00:29:22	2012-03-20 00:29:00	12	2012-01-21 00:01:41	0
434	2	2012-01-20 06:52:32	2012-03-20 06:52:00	10	2012-01-22 09:44:23	0
435	11	2012-01-20 06:13:25	2012-03-20 06:13:00	1	2012-01-27 13:19:18	2
436	1	2012-01-20 09:54:35	2012-01-24 04:54:00	8	2012-01-21 15:16:02	0
437	8	2012-01-20 09:09:11	2012-03-20 09:09:00	3	2012-01-24 11:29:38	1
438	5	2012-01-20 09:58:47	2012-03-20 09:58:00	24	2012-01-22 11:28:24	0
439	1	2012-01-20 11:04:15	2012-03-20 11:04:00	8	2012-01-21 10:39:19	0
440	4	2012-01-20 12:04:28	2012-03-20 12:04:00	12	2012-01-23 14:53:27	0
441	1	2012-01-20 12:54:39	2012-01-24 01:54:00	8	2012-01-21 09:27:07	0
442	2	2012-01-20 14:52:08	2012-03-20 14:52:00	10	2012-01-21 20:55:33	0
443	3	2012-01-20 14:29:25	2012-03-20 14:29:00	24	2012-01-23 07:47:18	0
444	7	2012-01-20 14:49:29	2012-01-25 06:49:00	24		0
445	3	2012-01-20 14:02:25	2012-03-20 14:02:00	24	2012-01-23 16:46:51	0
446	2	2012-01-20 15:53:04	2012-03-20 15:53:00	10	2012-01-21 11:23:05	0
447	1	2012-01-20 17:55:33	2012-03-20 17:55:00	8	2012-01-21 11:53:54	0
448	10	2012-01-20 17:31:40	2012-03-20 17:31:00	1	2012-01-27 09:13:30	0
449	6	2012-01-20 18:47:33	2012-03-20 18:47:00	24	2012-01-24 21:36:12	0
450	1	2012-01-20 20:04:23	2012-03-20 20:04:00	12	2012-01-21 11:39:01	0
451	2	2012-01-20 21:00:51	2012-03-20 21:00:00	10	2012-01-22 06:47:29	0
452	6	2012-01-20 21:46:55	2012-03-20 21:46:00	24	2012-01-26 10:34:39	0
453	1	2012-01-20 22:33:27	2012-01-25 04:33:09	8		0
454	7	2012-01-21 01:02:56	2012-03-21 01:02:00	24	2012-01-23 23:18:30	0
455	1	2012-01-21 03:58:54	2012-03-21 03:58:00	8	2012-01-22 04:52:34	0
456	2	2012-01-21 08:34:46	2012-03-21 08:34:00	10	2012-01-21 19:51:30	0
457	8	2012-01-21 09:08:03	2012-03-21 09:08:00	3	2012-01-24 21:32:50	0
458	6	2012-01-21 09:52:16	2012-01-23 22:51:47	24		0
459	5	2012-01-21 09:48:31	2012-03-21 09:48:00	24	2012-01-23 20:10:19	0
460	2	2012-01-21 10:05:10	2012-03-21 10:05:00	10	2012-01-22 10:58:36	0
461	1	2012-01-21 10:39:23	2012-03-21 10:39:00	8	2012-01-22 10:41:18	0
462	2	2012-01-21 12:09:46	2012-03-21 12:09:00	10	2012-01-22 09:17:52	0
463	7	2012-01-21 13:10:04	2012-01-25 15:09:09	24		1
464	3	2012-01-21 13:51:31	2012-01-24 19:50:57	24		0
465	1	2012-01-21 13:16:00	2012-03-21 13:16:00	8	2012-01-22 09:27:02	0
466	3	2012-01-21 14:40:06	2012-03-21 14:40:00	24	2012-01-24 07:10:56	0
467	1	2012-01-21 18:43:23	2012-03-21 18:43:00	12	2012-01-22 15:34:14	0
468	2	2012-01-21 19:16:11	2012-03-21 19:16:00	10	2012-01-23 13:35:54	0
469	2	2012-01-21 19:53:17	2012-03-21 19:53:00	10	2012-01-23 08:10:54	0
470	1	2012-01-21 19:36:02	2012-03-21 19:36:00	12	2012-01-22 08:39:17	0
471	6	2012-01-21 20:20:14	2012-01-24 06:19:24	24		0
472	4	2012-01-21 21:21:59	2012-03-21 21:21:00	12	2012-01-23 20:02:48	0
473	1	2012-01-21 21:04:32	2012-03-21 21:04:00	8	2012-01-22 08:16:10	0
474	6	2012-01-22 00:16:58	2012-03-22 00:16:00	24	2012-01-27 12:10:03	0
475	1	2012-01-22 00:19:56	2012-03-22 00:19:00	12	2012-01-22 14:40:43	0
476	1	2012-01-22 01:52:23	2012-03-22 01:52:00	8	2012-01-23 08:03:38	0
477	3	2012-01-22 05:10:24	2012-03-22 05:10:00	24	2012-01-24 15:44:38	0
478	7	2012-01-22 08:03:31	2012-01-24 19:03:06	24		0
479	7	2012-01-22 08:34:31	2012-03-22 08:34:00	24	2012-01-27 16:41:20	0
480	2	2012-01-22 10:05:55	2012-01-24 12:05:50	10		0
481	2	2012-01-22 10:13:55	2012-03-22 10:13:00	10	2012-01-23 10:13:40	0
482	5	2012-01-22 11:00:37	2012-03-22 11:00:00	24	2012-01-25 12:46:48	0
483	2	2012-01-22 11:29:04	2012-03-22 11:29:00	10	2012-01-23 07:19:05	0
484	4	2012-01-22 11:02:44	2012-03-22 11:02:00	12	2012-01-25 10:29:32	0
485	3	2012-01-22 11:50:26	2012-03-22 11:50:00	24	2012-01-24 12:00:23	0
486	4	2012-01-22 12:32:54	2012-03-22 12:32:00	12	2012-01-24 17:17:53	0
487	4	2012-01-22 13:12:36	2012-03-22 13:12:00	12	2012-01-25 11:19:34	0
488	4	2012-01-22 13:57:50	2012-03-22 13:57:00	12	2012-01-24 10:30:30	0
489	3	2012-01-22 13:46:13	2012-03-22 13:46:00	24	2012-01-24 08:57:54	0
490	5	2012-01-22 17:08:03	2012-03-22 17:08:00	24	2012-01-25 18:15:03	0
491	3	2012-01-22 17:32:39	2012-01-25 18:32:05	24		0
492	1	2012-01-22 17:24:44	2012-03-22 17:24:00	8	2012-01-23 10:50:06	0
493	1	2012-01-22 17:18:01	2012-03-22 17:18:00	12	2012-01-23 09:44:08	0
494	6	2012-01-22 17:16:35	2012-03-22 17:16:00	24	2012-01-29 17:07:27	0
495	3	2012-01-22 18:36:09	2012-03-22 18:36:00	24	2012-01-24 06:43:48	0
496	2	2012-01-22 19:04:58	2012-03-22 19:04:00	10	2012-01-23 14:46:16	0
497	1	2012-01-22 20:40:15	2012-03-22 20:40:00	8	2012-01-23 11:09:19	0
498	1	2012-01-22 20:08:13	2012-03-22 20:08:00	12	2012-01-23 11:37:34	0
499	4	2012-01-22 21:15:22	2012-03-22 21:15:00	12	2012-01-25 20:45:16	0
500	6	2012-01-22 23:08:24	2012-03-22 23:08:00	24	2012-02-03 18:58:31	0
501	3	2012-01-23 00:09:34	2012-03-23 00:09:00	24	2012-01-24 14:00:42	0
502	7	2012-01-23 01:26:57	2012-03-23 01:26:00	24	2012-01-31 18:34:13	0
503	7	2012-01-23 01:50:14	2012-03-23 01:50:00	24	2012-01-25 18:58:11	0
504	3	2012-01-23 03:31:18	2012-03-23 03:31:00	24	2012-01-25 04:29:09	0
505	6	2012-01-23 03:09:20	2012-03-23 03:09:00	24	2012-01-30 14:17:47	1
506	5	2012-01-23 05:01:27	2012-03-23 05:01:00	24	2012-01-28 10:11:35	0
507	2	2012-01-23 07:53:10	2012-01-26 08:52:54	10		0
508	2	2012-01-23 08:51:52	2012-03-23 08:51:00	10	2012-01-24 17:33:35	0
509	3	2012-01-23 08:31:19	2012-03-23 08:31:00	24	2012-01-25 10:43:44	0
510	10	2012-01-23 08:35:35	2012-03-23 08:35:00	1	2012-01-30 11:09:44	2
511	6	2012-01-23 08:57:35	2012-03-23 08:57:00	24	2012-01-27 16:26:30	0
512	3	2012-01-23 08:33:27	2012-01-25 22:33:12	24		0
513	6	2012-01-23 08:19:09	2012-03-23 08:19:00	24	2012-01-27 18:08:51	0
514	1	2012-01-23 09:54:05	2012-03-23 09:54:00	8	2012-01-24 12:10:36	0
515	8	2012-01-23 09:22:17	2012-01-27 10:21:29	3		1
516	9	2012-01-23 09:41:23	2012-03-23 09:41:00	5	2012-01-26 15:16:48	0
517	5	2012-01-23 09:08:37	2012-03-23 09:08:00	24	2012-01-25 11:22:49	0
518	9	2012-01-23 09:19:54	2012-03-23 09:19:00	5	2012-01-26 05:43:23	0
519	2	2012-01-23 10:23:57	2012-03-23 10:23:00	10	2012-01-24 11:39:27	0
520	1	2012-01-23 11:06:54	2012-03-23 11:06:00	8	2012-01-24 15:27:46	0
521	1	2012-01-23 11:31:21	2012-03-23 11:31:00	8	2012-01-24 13:10:08	0
522	8	2012-01-23 11:50:34	2012-03-23 11:50:00	3	2012-01-30 10:30:09	1
523	1	2012-01-23 12:43:35	2012-03-23 12:43:00	12	2012-01-24 09:24:29	0
524	3	2012-01-23 12:25:53	2012-03-23 12:25:00	24	2012-01-25 14:19:49	0
525	7	2012-01-23 12:24:27	2012-03-23 12:24:00	24	2012-02-12 11:40:29	0
526	2	2012-01-23 12:09:19	2012-01-27 04:08:26	10		0
527	2	2012-01-23 14:02:24	2012-03-23 14:02:00	10	2012-01-24 11:58:13	0
528	5	2012-01-23 15:50:04	2012-03-23 15:50:00	24	2012-01-28 14:36:42	0
529	4	2012-01-23 15:56:37	2012-01-26 02:55:59	12		0
530	7	2012-01-23 16:14:59	2012-03-23 16:15:00	24	2012-03-04 13:40:46	0
531	2	2012-01-23 16:30:55	2012-03-23 16:30:00	10	2012-01-24 12:29:55	0
532	6	2012-01-23 16:03:53	2012-03-23 16:03:00	24	2012-02-05 15:22:27	0
533	1	2012-01-23 17:08:12	2012-03-23 17:08:00	12	2012-01-24 15:44:07	0
534	8	2012-01-23 18:10:35	2012-03-23 18:10:00	3	2012-01-28 07:22:53	0
535	1	2012-01-23 18:29:53	2012-03-23 18:29:00	8	2012-01-23 21:14:33	0
536	6	2012-01-23 20:02:54	2012-03-23 20:02:00	24	2012-01-30 12:29:24	0
537	6	2012-01-23 20:40:41	2012-03-23 20:40:00	24	2012-02-05 22:49:40	0
538	10	2012-01-23 21:19:55	2012-01-25 23:19:50	1		2
539	6	2012-01-23 22:58:45	2012-01-26 16:58:28	24		0
540	3	2012-01-24 00:36:45	2012-03-24 00:36:00	24	2012-01-27 14:03:27	0
541	7	2012-01-24 02:23:53	2012-03-24 02:23:00	24	2012-02-02 18:25:49	0
542	3	2012-01-24 02:06:25	2012-03-24 02:06:00	24	2012-01-26 08:04:14	0
543	3	2012-01-24 03:43:11	2012-03-24 03:43:00	24	2012-01-26 12:44:39	0
544	7	2012-01-24 06:40:51	2012-03-24 06:40:00	24	2012-01-29 13:54:54	0
545	8	2012-01-24 07:43:43	2012-03-24 07:43:00	3	2012-01-29 17:02:53	1
546	3	2012-01-24 08:53:28	2012-03-24 08:53:00	24	2012-01-26 13:15:10	0
547	7	2012-01-24 08:52:03	2012-03-24 08:52:00	24	2012-01-29 11:26:44	0
548	2	2012-01-24 09:49:01	2012-01-28 09:48:49	10		0
549	9	2012-01-24 09:33:46	2012-03-24 09:33:00	5	2012-01-27 15:49:31	0
550	5	2012-01-24 09:11:27	2012-03-24 09:11:00	24	2012-01-26 16:35:12	0
551	8	2012-01-24 09:05:11	2012-03-24 09:05:00	3	2012-01-29 11:50:12	0
552	5	2012-01-24 09:34:35	2012-03-24 09:34:00	24	2012-01-26 10:09:20	0
553	4	2012-01-24 10:03:05	2012-03-24 10:03:00	12	2012-01-27 11:56:37	0
554	3	2012-01-24 10:27:02	2012-01-26 21:27:00	24	2012-01-26 16:43:57	0
555	7	2012-01-24 16:01:20	2012-03-24 16:01:00	24	2012-03-05 15:54:05	0
556	5	2012-01-24 16:13:00	2012-03-24 16:13:00	24	2012-01-28 11:28:51	0
557	1	2012-01-24 17:02:17	2012-03-24 17:02:00	8	2012-01-25 15:08:38	0
558	2	2012-01-24 17:46:04	2012-03-24 17:46:00	10	2012-01-25 09:57:53	0
559	8	2012-01-24 18:27:55	2012-03-24 18:27:00	3	2012-01-29 14:20:36	1
560	6	2012-01-24 20:43:40	2012-03-24 20:43:00	24	2012-02-04 23:56:38	0
561	5	2012-01-24 20:29:15	2012-03-24 20:29:00	24	2012-01-27 13:46:48	0
562	6	2012-01-24 20:33:51	2012-03-24 20:33:00	24	2012-02-05 22:56:40	0
563	6	2012-01-24 22:10:19	2012-03-24 22:10:00	24	2012-01-27 12:02:16	0
564	5	2012-01-24 22:30:49	2012-03-24 22:30:00	24	2012-01-25 11:15:04	0
565	1	2012-01-24 22:04:31	2012-03-24 22:04:00	8	2012-01-25 11:23:47	0
566	1	2012-01-25 01:04:28	2012-03-25 01:04:00	12	2012-01-26 12:13:30	0
567	2	2012-01-25 08:40:18	2012-01-27 18:39:44	10		0
568	2	2012-01-25 08:06:16	2012-03-25 08:06:00	10	2012-01-25 15:40:58	0
569	8	2012-01-25 09:29:30	2012-03-25 09:29:00	3	2012-01-30 11:40:17	0
570	7	2012-01-25 09:18:53	2012-03-25 09:18:00	24	2012-01-28 16:53:29	0
571	6	2012-01-25 09:22:00	2012-03-25 09:22:00	24	2012-01-28 11:29:31	0
572	2	2012-01-25 10:17:08	2012-03-25 10:17:00	10	2012-01-26 11:55:32	0
573	10	2012-01-25 10:18:13	2012-03-25 10:18:00	1	2012-02-01 16:15:09	3
574	2	2012-01-25 10:46:02	2012-01-28 19:45:23	10		0
575	11	2012-01-25 10:39:33	2012-01-27 12:38:56	1		6
576	2	2012-01-25 10:41:24	2012-03-25 10:41:00	10	2012-01-26 11:30:07	0
577	1	2012-01-25 10:31:51	2012-03-25 10:31:00	8	2012-01-26 17:25:33	0
578	4	2012-01-25 10:48:54	2012-03-25 10:48:00	12	2012-01-28 11:46:56	0
579	1	2012-01-25 11:32:21	2012-01-28 22:31:44	8		0
580	2	2012-01-25 11:12:04	2012-03-25 11:12:00	10	2012-01-26 04:54:53	0
581	1	2012-01-25 12:24:51	2012-01-30 03:24:17	12		0
582	4	2012-01-25 13:11:27	2012-03-25 13:11:00	12	2012-01-28 20:55:02	0
583	4	2012-01-25 13:36:52	2012-01-29 20:36:00	12	2012-01-27 16:15:26	0
584	3	2012-01-25 14:45:08	2012-03-25 14:45:00	24	2012-01-28 11:12:56	0
585	3	2012-01-25 14:06:23	2012-03-25 14:06:00	24	2012-01-28 16:09:16	0
586	4	2012-01-25 15:48:20	2012-03-25 15:48:00	12	2012-01-28 21:25:02	0
587	7	2012-01-25 19:11:45	2012-03-25 19:11:00	24	2012-03-18 11:17:06	0
588	2	2012-01-25 19:33:54	2012-03-25 19:33:00	10	2012-01-27 11:46:49	0
589	1	2012-01-25 19:36:13	2012-03-25 19:36:00	12	2012-01-26 16:40:04	0
590	2	2012-01-25 19:39:58	2012-03-25 19:39:00	10	2012-01-28 00:44:14	0
591	6	2012-01-25 22:06:16	2012-03-25 22:06:00	24	2012-01-29 14:30:18	0
592	4	2012-01-26 02:02:33	2012-01-28 16:02:18	12		0
593	1	2012-01-26 03:19:19	2012-01-30 04:18:32	8		0
594	1	2012-01-26 05:18:44	2012-03-26 05:18:00	12	2012-01-27 15:38:34	0
595	2	2012-01-26 08:30:16	2012-03-26 08:30:00	10	2012-01-26 17:05:29	0
596	11	2012-01-26 10:32:13	2012-03-26 10:32:00	1	2012-02-02 11:41:44	0
597	2	2012-01-26 10:08:00	2012-01-29 03:07:04	10		0
598	2	2012-01-26 10:06:51	2012-03-26 10:06:00	10	2012-01-27 12:04:41	0
599	4	2012-01-26 11:03:01	2012-03-26 11:03:00	12	2012-01-29 13:09:41	0
600	1	2012-01-26 11:13:27	2012-01-30 03:12:34	8		0
601	3	2012-01-26 11:31:19	2012-03-26 11:31:00	24	2012-01-28 10:48:39	0
602	1	2012-01-26 11:48:04	2012-03-26 11:48:00	12	2012-01-27 21:52:25	0
603	7	2012-01-26 12:11:22	2012-03-26 12:11:00	24	2012-02-15 15:11:31	0
604	5	2012-01-26 15:43:31	2012-03-26 15:43:00	24	2012-01-31 07:08:03	0
605	1	2012-01-26 16:52:32	2012-03-26 16:52:00	12	2012-01-27 11:34:05	0
606	7	2012-01-26 17:33:09	2012-03-26 17:33:00	24	2012-02-11 18:25:14	1
607	1	2012-01-26 18:25:04	2012-03-26 18:25:00	8	2012-01-27 21:06:05	0
608	2	2012-01-26 21:19:53	2012-01-29 13:19:51	10		0
609	7	2012-01-27 01:54:46	2012-03-27 01:54:00	24	2012-01-30 12:43:02	0
610	1	2012-01-27 03:21:15	2012-01-30 05:21:00	8	2012-01-27 08:08:00	0
611	5	2012-01-27 03:07:59	2012-03-27 03:08:00	24	2012-01-31 08:51:40	0
612	6	2012-01-27 03:29:38	2012-03-27 03:29:00	24	2012-02-08 20:34:03	0
613	3	2012-01-27 07:15:44	2012-03-27 07:15:00	24	2012-01-29 09:40:15	0
614	1	2012-01-27 08:47:24	2012-03-27 08:47:00	8	2012-01-28 10:46:56	0
615	1	2012-01-27 09:29:50	2012-03-27 09:29:00	8	2012-01-27 19:02:36	0
616	8	2012-01-27 09:00:51	2012-03-27 09:00:00	3	2012-01-31 10:34:24	0
617	2	2012-01-27 11:15:11	2012-01-31 06:14:27	10		0
618	2	2012-01-27 12:49:49	2012-01-31 17:49:00	10	2012-01-28 14:37:07	0
619	4	2012-01-27 12:17:34	2012-03-27 12:17:00	12	2012-01-30 12:30:53	0
620	1	2012-01-27 13:01:04	2012-01-30 07:00:48	8		0
621	1	2012-01-27 15:40:04	2012-03-27 15:40:00	12	2012-01-28 09:09:06	0
622	4	2012-01-27 15:44:06	2012-03-27 15:44:00	12	2012-01-31 01:43:41	0
623	1	2012-01-27 21:17:34	2012-03-27 21:17:00	8	2012-01-28 08:43:13	0
624	6	2012-01-27 22:56:39	2012-03-27 22:56:00	24	2012-01-29 12:29:07	0
625	3	2012-01-28 00:30:00	2012-03-28 00:30:00	24	2012-01-31 11:21:35	0
626	6	2012-01-28 08:44:55	2012-01-31 19:44:45	24		0
627	6	2012-01-28 08:20:51	2012-01-31 05:20:00	24		0
628	11	2012-01-28 08:54:16	2012-03-28 08:54:00	1	2012-02-04 15:22:30	4
629	4	2012-01-28 09:04:34	2012-03-28 09:04:00	12	2012-01-29 05:30:41	0
630	3	2012-01-28 10:48:22	2012-03-28 10:48:00	24	2012-01-31 11:30:09	0
631	2	2012-01-28 12:03:56	2012-03-28 12:03:00	10	2012-01-29 11:52:28	0
632	5	2012-01-28 12:32:49	2012-03-28 12:32:00	24	2012-02-01 14:04:24	0
633	3	2012-01-28 12:24:20	2012-03-28 12:24:00	24	2012-01-30 12:10:22	0
634	4	2012-01-28 13:12:51	2012-03-28 13:12:00	12	2012-01-31 11:21:35	0
635	1	2012-01-28 14:25:32	2012-02-01 18:24:43	8		0
636	3	2012-01-28 17:43:17	2012-01-31 20:43:00	24	2012-01-31 15:07:44	0
637	3	2012-01-28 17:39:20	2012-03-28 17:39:00	24	2012-01-31 22:30:19	0
638	3	2012-01-28 17:39:55	2012-03-28 17:39:00	24	2012-01-31 13:24:25	0
639	1	2012-01-28 19:01:26	2012-03-28 19:01:00	8	2012-01-29 09:24:25	0
640	6	2012-01-28 21:33:33	2012-03-28 21:33:00	24	2012-02-01 20:42:50	0
641	5	2012-01-28 22:11:00	2012-03-28 22:11:00	24	2012-01-29 18:42:00	0
642	1	2012-01-29 00:39:45	2012-03-29 00:39:00	8	2012-01-30 08:37:47	0
643	1	2012-01-29 01:13:27	2012-03-29 01:13:00	8	2012-01-29 10:35:21	0
644	1	2012-01-29 03:16:08	2012-03-29 03:16:00	8	2012-01-29 17:56:49	0
645	3	2012-01-29 03:13:14	2012-02-01 20:13:00	24	2012-01-30 20:48:49	0
646	10	2012-01-29 04:38:08	2012-03-29 04:38:00	1	2012-02-01 21:01:31	0
647	10	2012-01-29 04:35:13	2012-03-29 04:35:00	1	2012-02-02 12:51:15	3
648	1	2012-01-29 06:28:40	2012-01-31 11:28:24	8		0
649	5	2012-01-29 07:37:44	2012-03-29 07:37:00	24	2012-02-01 10:02:13	0
650	1	2012-01-29 07:14:58	2012-02-01 13:14:00	12	2012-01-30 10:34:16	0
651	5	2012-01-29 08:54:15	2012-03-29 08:54:00	24	2012-02-01 15:42:24	0
652	7	2012-01-29 09:19:27	2012-03-29 09:19:00	24	2012-01-31 21:31:22	0
653	6	2012-01-29 09:27:35	2012-01-31 16:27:11	24		0
654	1	2012-01-29 09:45:33	2012-02-01 09:44:52	8		0
655	1	2012-01-29 10:13:26	2012-03-29 10:13:00	8	2012-01-30 11:17:34	0
656	4	2012-01-29 10:20:18	2012-03-29 10:20:00	12	2012-01-31 16:53:44	0
657	6	2012-01-29 10:16:34	2012-03-29 10:16:00	24	2012-02-05 16:06:57	0
658	2	2012-01-29 11:25:24	2012-03-29 11:25:00	10	2012-01-30 09:10:31	0
659	3	2012-01-29 11:54:09	2012-02-02 13:54:00	24	2012-01-31 17:39:42	0
660	1	2012-01-29 11:24:55	2012-03-29 11:24:00	12	2012-01-30 08:24:46	0
661	5	2012-01-29 11:56:01	2012-03-29 11:56:00	24	2012-02-02 09:26:35	0
662	3	2012-01-29 12:12:45	2012-03-29 12:12:00	24	2012-01-31 12:56:23	0
663	4	2012-01-29 13:34:11	2012-03-29 13:34:00	12	2012-01-31 07:23:48	0
664	1	2012-01-29 13:12:24	2012-03-29 13:12:00	8	2012-01-30 14:36:03	0
665	1	2012-01-29 13:15:27	2012-03-29 13:15:00	8	2012-01-30 20:12:44	0
666	5	2012-01-29 14:32:34	2012-03-29 14:32:00	24	2012-02-02 11:42:03	0
667	1	2012-01-29 15:51:24	2012-02-03 12:51:21	12		0
668	2	2012-01-29 16:32:07	2012-03-29 16:32:00	10	2012-01-31 06:14:26	0
669	1	2012-01-29 16:46:18	2012-03-29 16:46:00	12	2012-01-30 15:57:52	0
670	4	2012-01-29 16:17:06	2012-03-29 16:17:00	12	2012-02-01 11:43:38	0
671	3	2012-01-29 16:51:16	2012-03-29 16:51:00	24	2012-02-01 11:23:19	0
672	1	2012-01-29 18:32:50	2012-03-29 18:32:00	8	2012-01-30 14:44:33	0
673	5	2012-01-29 18:27:46	2012-03-29 18:27:00	24	2012-02-01 08:56:39	0
674	6	2012-01-29 18:21:14	2012-03-29 18:21:00	24	2012-02-02 10:19:58	0
675	1	2012-01-29 19:54:58	2012-03-29 19:54:00	8	2012-01-30 13:19:22	0
676	10	2012-01-29 21:42:25	2012-02-03 12:41:51	1		3
677	6	2012-01-29 23:25:05	2012-02-03 03:24:16	24		0
678	5	2012-01-29 23:29:19	2012-02-01 05:28:25	24		0
679	10	2012-01-30 04:44:42	2012-03-30 04:44:00	1	2012-02-02 10:57:33	1
680	10	2012-01-30 08:00:21	2012-03-30 08:00:00	1	2012-02-06 16:40:06	3
681	3	2012-01-30 08:35:33	2012-03-30 08:35:00	24	2012-02-01 19:04:12	0
682	8	2012-01-30 09:19:50	2012-03-30 09:19:00	3	2012-02-04 10:48:22	0
683	9	2012-01-30 09:26:56	2012-03-30 09:26:00	5	2012-02-02 12:14:17	0
684	10	2012-01-30 11:05:32	2012-02-03 20:04:53	1		2
685	2	2012-01-30 12:29:46	2012-03-30 12:29:00	10	2012-01-31 14:21:50	0
686	6	2012-01-30 13:47:52	2012-03-30 13:47:00	24	2012-02-05 10:28:42	0
687	2	2012-01-30 16:35:27	2012-03-30 16:35:00	10	2012-01-31 14:55:45	0
688	2	2012-01-30 19:52:58	2012-03-30 19:52:00	10	2012-02-01 08:58:52	0
689	7	2012-01-30 19:55:09	2012-02-03 06:55:00	24		0
690	1	2012-01-30 20:38:07	2012-03-30 20:38:00	12	2012-01-31 13:08:26	0
691	7	2012-01-31 01:26:52	2012-02-03 13:26:00	24		0
692	7	2012-01-31 01:51:10	2012-03-31 01:51:00	24	2012-02-02 15:21:01	0
693	1	2012-01-31 05:19:12	2012-03-31 05:19:00	8	2012-02-01 15:36:14	0
694	5	2012-01-31 08:27:39	2012-03-31 08:27:00	24	2012-02-03 10:49:46	0
695	1	2012-01-31 09:37:31	2012-03-31 09:37:00	8	2012-02-01 07:10:23	0
696	7	2012-01-31 12:40:07	2012-03-31 12:40:00	24	2012-02-22 02:38:39	1
697	1	2012-01-31 14:01:45	2012-02-03 14:01:00	8	2012-02-01 09:27:19	0
698	1	2012-01-31 15:17:54	2012-02-04 17:16:58	8		0
699	1	2012-01-31 15:35:18	2012-03-31 15:35:00	12	2012-02-01 17:08:25	0
700	1	2012-01-31 16:06:41	2012-02-03 11:06:00	8	2012-02-01 15:34:30	0
701	6	2012-01-31 18:10:48	2012-02-03 00:09:54	24		0
702	4	2012-01-31 18:38:47	2012-03-31 18:38:00	12	2012-02-02 14:06:52	0
703	1	2012-01-31 18:51:45	2012-03-31 18:51:00	12	2012-02-01 11:52:18	0
704	1	2012-01-31 19:17:46	2012-02-04 22:17:00	8	2012-02-01 13:20:34	0
705	5	2012-01-31 20:44:00	2012-03-31 20:44:00	24	2012-02-03 14:23:18	0
706	5	2012-01-31 21:20:55	2012-03-31 21:20:00	24	2012-02-03 18:27:25	0
707	1	2012-01-31 23:41:06	2012-03-31 23:41:00	8	2012-02-01 11:03:12	0
708	5	2012-02-01 03:25:32	2012-02-05 09:25:14	24		0
709	3	2012-02-01 03:02:32	2012-02-04 10:01:36	24		0
710	3	2012-02-01 05:53:07	2012-02-03 21:52:39	24		0
711	1	2012-02-01 07:53:36	2012-04-01 07:53:00	8	2012-02-02 10:29:15	0
712	3	2012-02-01 08:58:04	2012-04-01 08:58:00	24	2012-02-03 11:43:21	0
713	7	2012-02-01 09:31:35	2012-02-05 14:30:46	24		0
714	2	2012-02-01 10:18:39	2012-04-01 10:18:00	10	2012-02-02 15:39:35	0
715	1	2012-02-01 11:28:30	2012-04-01 11:28:00	8	2012-02-02 11:30:44	0
716	7	2012-02-01 11:15:36	2012-04-01 11:15:00	24	2012-02-14 12:20:15	0
717	5	2012-02-01 11:18:56	2012-04-01 11:18:00	24	2012-02-04 07:46:19	0
718	1	2012-02-01 11:02:51	2012-04-01 11:02:00	8	2012-02-02 08:45:20	0
719	3	2012-02-01 15:34:14	2012-04-01 15:34:00	24	2012-02-03 21:56:24	0
720	1	2012-02-01 15:12:27	2012-02-04 13:12:00	8	2012-02-02 09:03:40	0
721	3	2012-02-01 16:07:08	2012-04-01 16:07:00	24	2012-02-04 12:08:16	0
722	8	2012-02-01 18:08:42	2012-04-01 18:08:00	3	2012-02-08 11:53:23	2
723	1	2012-02-01 19:56:43	2012-04-01 19:56:00	8	2012-02-02 13:17:43	0
724	1	2012-02-01 19:50:41	2012-04-01 19:50:00	8	2012-02-02 13:31:15	0
725	1	2012-02-01 20:40:05	2012-02-05 12:40:00	12	2012-02-03 11:40:20	0
726	7	2012-02-01 21:14:28	2012-04-01 21:14:00	24	2012-02-14 20:07:23	0
727	1	2012-02-01 23:36:56	2012-04-01 23:36:00	8	2012-02-02 21:08:41	0
728	3	2012-02-02 08:56:42	2012-02-04 18:55:44	24		0
729	6	2012-02-02 09:30:32	2012-04-02 09:30:00	24	2012-02-05 18:44:30	0
730	2	2012-02-02 10:02:39	2012-04-02 10:02:00	10	2012-02-03 20:11:15	0
731	1	2012-02-02 10:11:31	2012-04-02 10:11:00	8	2012-02-03 14:02:02	0
732	1	2012-02-02 12:57:27	2012-04-02 12:57:00	8	2012-02-03 14:07:42	0
733	3	2012-02-02 12:01:22	2012-04-02 12:01:00	24	2012-02-04 17:06:12	0
734	1	2012-02-02 13:16:44	2012-02-05 16:15:52	12		0
735	3	2012-02-02 13:34:17	2012-04-02 13:34:00	24	2012-02-04 15:28:20	0
736	5	2012-02-02 13:37:20	2012-04-02 13:37:00	24	2012-02-06 15:02:49	0
737	2	2012-02-02 17:32:44	2012-04-02 17:32:00	10	2012-02-04 22:19:43	0
738	1	2012-02-02 17:22:52	2012-04-02 17:22:00	8	2012-02-03 10:22:17	0
739	10	2012-02-02 17:12:43	2012-04-02 17:12:00	1	2012-02-09 17:07:12	0
740	4	2012-02-02 19:49:48	2012-02-06 09:48:50	12		0
741	2	2012-02-02 19:31:41	2012-04-02 19:31:00	10	2012-02-03 16:28:46	0
742	6	2012-02-02 20:54:31	2012-04-02 20:54:00	24	2012-02-07 23:38:56	0
743	4	2012-02-02 21:18:46	2012-02-05 06:18:21	12		0
744	5	2012-02-03 03:22:41	2012-04-03 03:22:00	24	2012-02-06 12:40:32	0
745	1	2012-02-03 06:36:51	2012-04-03 06:36:00	8	2012-02-04 14:50:29	0
746	1	2012-02-03 08:48:48	2012-02-07 13:48:00	8	2012-02-03 17:47:10	0
747	1	2012-02-03 08:47:26	2012-02-05 10:46:49	8		0
748	10	2012-02-03 08:41:54	2012-04-03 08:41:00	1	2012-02-10 08:02:45	3
749	1	2012-02-03 09:41:45	2012-02-05 19:40:47	8		0
750	9	2012-02-03 09:53:52	2012-04-03 09:53:00	5	2012-02-06 05:11:43	0
751	2	2012-02-03 10:21:46	2012-04-03 10:21:00	10	2012-02-04 17:42:57	0
752	6	2012-02-03 10:41:43	2012-02-06 03:41:26	24		0
753	3	2012-02-03 10:13:04	2012-04-03 10:13:00	24	2012-02-05 09:25:49	0
754	2	2012-02-03 11:42:15	2012-04-03 11:42:00	10	2012-02-04 09:43:34	0
755	4	2012-02-03 12:44:37	2012-04-03 12:44:00	12	2012-02-05 09:47:02	0
756	6	2012-02-03 14:51:57	2012-04-03 14:51:00	24	2012-02-10 16:48:04	0
757	1	2012-02-03 14:50:37	2012-04-03 14:50:00	12	2012-02-04 15:56:03	0
758	1	2012-02-03 14:43:34	2012-04-03 14:43:00	8	2012-02-04 10:50:35	0
759	1	2012-02-03 14:21:02	2012-04-03 14:21:00	12	2012-02-04 08:55:47	0
760	5	2012-02-03 15:29:52	2012-02-06 18:29:00	24		0
761	2	2012-02-03 16:13:57	2012-04-03 16:13:00	10	2012-02-05 14:29:43	0
762	1	2012-02-03 17:57:19	2012-04-03 17:57:00	8	2012-02-04 09:42:03	0
763	2	2012-02-03 17:17:25	2012-04-03 17:17:00	10	2012-02-04 11:45:59	0
764	7	2012-02-03 17:29:20	2012-04-03 17:29:00	24	2012-02-13 11:55:09	0
765	2	2012-02-03 18:30:16	2012-04-03 18:30:00	10	2012-02-04 14:03:21	0
766	6	2012-02-03 18:07:03	2012-04-03 18:07:00	24	2012-02-07 07:16:48	0
767	1	2012-02-03 18:24:40	2012-02-07 13:24:16	12		0
768	5	2012-02-03 20:48:45	2012-04-03 20:48:00	24	2012-02-06 14:03:22	0
769	1	2012-02-03 22:23:27	2012-02-07 17:22:59	8		0
770	6	2012-02-03 22:08:56	2012-04-03 22:08:00	24	2012-02-05 11:16:08	0
771	1	2012-02-04 00:40:47	2012-04-04 00:40:00	8	2012-02-05 11:18:45	0
772	6	2012-02-04 04:40:15	2012-04-04 04:40:00	24	2012-02-07 10:49:54	0
773	2	2012-02-04 06:41:05	2012-02-08 01:40:22	10		0
774	6	2012-02-04 09:46:50	2012-04-04 09:46:00	24	2012-02-07 12:10:33	0
775	6	2012-02-04 09:42:15	2012-04-04 09:42:00	24	2012-02-06 05:19:42	0
776	2	2012-02-04 10:41:50	2012-04-04 10:41:00	10	2012-02-05 12:20:47	0
777	3	2012-02-04 11:07:46	2012-04-04 11:07:00	24	2012-02-07 20:56:48	0
778	2	2012-02-04 13:44:42	2012-02-07 10:44:17	10		0
779	3	2012-02-04 14:54:41	2012-04-04 14:54:00	24	2012-02-07 08:32:44	0
780	1	2012-02-04 14:50:28	2012-04-04 14:50:00	8	2012-02-04 15:10:15	0
781	3	2012-02-04 14:17:47	2012-04-04 14:17:00	24	2012-02-07 11:02:46	0
782	5	2012-02-04 14:17:19	2012-04-04 14:17:00	24	2012-02-08 18:00:30	0
783	1	2012-02-04 14:39:15	2012-04-04 14:39:00	8	2012-02-05 07:02:18	0
784	1	2012-02-04 17:11:05	2012-04-04 17:11:00	8	2012-02-05 10:56:16	0
785	1	2012-02-04 17:35:23	2012-02-06 17:35:00	12	2012-02-05 11:33:21	0
786	10	2012-02-04 17:25:04	2012-04-04 17:25:00	1	2012-02-11 10:37:34	0
787	1	2012-02-04 18:20:00	2012-04-04 18:20:00	8	2012-02-05 00:20:11	0
788	8	2012-02-04 18:12:17	2012-02-07 10:12:15	3		1
789	4	2012-02-04 18:26:12	2012-04-04 18:26:00	12	2012-02-06 08:54:22	0
790	5	2012-02-04 20:13:35	2012-02-07 15:13:00	24		0
791	2	2012-02-04 23:58:50	2012-02-08 19:58:00	10	2012-02-05 15:33:40	0
792	1	2012-02-05 00:54:26	2012-04-05 00:54:00	8	2012-02-06 00:03:43	0
793	1	2012-02-05 01:13:08	2012-04-05 01:13:00	12	2012-02-06 10:08:03	0
794	1	2012-02-05 01:16:12	2012-02-08 16:15:50	8		0
795	1	2012-02-05 08:09:06	2012-04-05 08:09:00	8	2012-02-06 13:31:52	0
796	7	2012-02-05 08:11:33	2012-04-05 08:11:00	24	2012-02-11 09:40:29	0
797	3	2012-02-05 09:26:09	2012-02-08 22:26:00	24	2012-02-06 18:47:57	0
798	1	2012-02-05 09:17:37	2012-02-08 17:17:00	8	2012-02-05 15:33:34	0
799	5	2012-02-05 12:10:28	2012-02-07 23:10:03	24		0
800	1	2012-02-05 12:55:43	2012-04-05 12:55:00	8	2012-02-06 11:17:34	0
801	6	2012-02-05 13:56:06	2012-04-05 13:56:00	24	2012-02-11 15:56:54	0
802	3	2012-02-05 13:56:58	2012-02-07 23:56:24	24		0
803	6	2012-02-05 13:26:34	2012-04-05 13:26:00	24	2012-02-12 12:10:07	0
804	2	2012-02-05 13:30:18	2012-04-05 13:30:00	10	2012-02-06 08:47:33	0
805	2	2012-02-05 14:16:18	2012-04-05 14:16:00	10	2012-02-06 07:05:32	0
806	1	2012-02-05 16:19:36	2012-04-05 16:19:00	8	2012-02-06 06:30:04	0
807	10	2012-02-05 17:23:25	2012-04-05 17:23:00	1	2012-02-12 18:12:52	3
808	2	2012-02-05 17:25:31	2012-04-05 17:25:00	10	2012-02-07 07:50:59	0
809	4	2012-02-05 18:45:49	2012-04-05 18:45:00	12	2012-02-07 17:06:17	0
810	7	2012-02-05 19:52:49	2012-04-05 19:52:00	24	2012-02-15 10:12:33	0
811	6	2012-02-05 20:44:20	2012-04-05 20:44:00	24	2012-02-12 20:22:24	0
812	1	2012-02-05 20:46:07	2012-04-05 20:46:00	8	2012-02-06 13:20:04	0
813	5	2012-02-05 21:31:35	2012-04-05 21:31:00	24	2012-02-08 14:57:56	0
814	2	2012-02-05 21:31:07	2012-02-09 13:30:20	10		0
815	6	2012-02-06 03:16:05	2012-04-06 03:16:00	24	2012-02-17 12:26:40	0
816	3	2012-02-06 03:02:47	2012-04-06 03:02:00	24	2012-02-07 20:43:19	0
817	5	2012-02-06 05:01:14	2012-04-06 05:01:00	24	2012-02-09 23:44:15	0
818	1	2012-02-06 05:30:44	2012-02-08 15:29:46	8		0
819	1	2012-02-06 07:22:42	2012-04-06 07:22:00	12	2012-02-07 10:46:26	0
820	4	2012-02-06 08:51:02	2012-04-06 08:51:00	12	2012-02-08 17:19:23	0
821	10	2012-02-06 08:31:40	2012-04-06 08:31:00	1	2012-02-13 11:37:50	5
822	6	2012-02-06 09:38:03	2012-04-06 09:38:00	24	2012-02-09 07:58:31	0
823	9	2012-02-06 09:22:57	2012-04-06 09:22:00	5	2012-02-09 11:15:18	0
824	5	2012-02-06 09:30:05	2012-04-06 09:30:00	24	2012-02-08 16:33:30	0
825	1	2012-02-06 11:57:23	2012-04-06 11:57:00	8	2012-02-07 10:07:12	0
826	4	2012-02-06 12:51:23	2012-02-08 13:51:02	12		0
827	2	2012-02-06 14:21:05	2012-04-06 14:21:00	10	2012-02-08 10:43:58	0
828	2	2012-02-06 14:33:53	2012-04-06 14:33:00	10	2012-02-08 15:36:54	0
829	1	2012-02-06 14:26:51	2012-04-06 14:26:00	8	2012-02-07 07:31:39	0
830	3	2012-02-06 15:53:47	2012-04-06 15:53:00	24	2012-02-09 12:40:53	0
831	7	2012-02-06 16:05:23	2012-04-06 16:05:00	24	2012-03-30 07:57:49	1
832	2	2012-02-06 17:13:40	2012-04-06 17:13:00	10	2012-02-07 12:03:00	0
833	1	2012-02-06 17:03:35	2012-04-06 17:03:00	8	2012-02-07 11:10:34	0
834	6	2012-02-06 17:50:13	2012-04-06 17:50:00	24	2012-02-12 11:08:28	0
835	8	2012-02-06 18:53:14	2012-04-06 18:53:00	3	2012-02-13 12:42:49	1
836	1	2012-02-06 18:16:25	2012-04-06 18:16:00	12	2012-02-07 11:39:04	0
837	1	2012-02-06 20:58:20	2012-04-06 20:58:00	12	2012-02-08 13:35:49	0
838	1	2012-02-06 20:20:09	2012-04-06 20:20:00	8	2012-02-07 12:37:03	0
839	1	2012-02-06 20:14:30	2012-04-06 20:14:00	8	2012-02-07 14:08:38	0
840	6	2012-02-06 20:38:39	2012-04-06 20:38:00	24	2012-02-12 08:39:03	0
841	10	2012-02-06 22:56:32	2012-02-11 05:56:00	1	2012-02-10 19:13:20	0
842	7	2012-02-07 01:44:38	2012-04-07 01:44:00	24	2012-03-05 12:53:55	2
843	1	2012-02-07 06:38:11	2012-04-07 06:38:00	8	2012-02-07 07:32:03	0
844	3	2012-02-07 07:46:05	2012-04-07 07:46:00	24	2012-02-10 09:15:34	0
845	5	2012-02-07 09:23:14	2012-04-07 09:23:00	24	2012-02-09 07:13:58	0
846	3	2012-02-07 10:54:19	2012-04-07 10:54:00	24	2012-02-09 11:31:51	0
847	4	2012-02-07 10:06:18	2012-04-07 10:06:00	12	2012-02-09 16:29:55	0
848	4	2012-02-07 10:37:17	2012-02-09 19:37:00	12		0
849	3	2012-02-07 14:08:35	2012-04-07 14:08:00	24	2012-02-10 18:55:04	0
850	2	2012-02-07 14:37:41	2012-04-07 14:37:00	10	2012-02-09 11:52:39	0
851	1	2012-02-07 14:55:36	2012-04-07 14:55:00	8	2012-02-08 16:33:06	0
852	1	2012-02-07 15:55:48	2012-02-10 03:54:59	8		0
853	4	2012-02-07 15:56:10	2012-04-07 15:56:00	12	2012-02-10 08:42:31	0
854	6	2012-02-07 15:50:12	2012-04-07 15:50:00	24	2012-02-18 11:44:55	0
855	3	2012-02-07 15:56:22	2012-04-07 15:56:00	24	2012-02-10 04:04:05	0
856	2	2012-02-07 18:13:25	2012-02-10 12:13:09	10		0
857	2	2012-02-07 19:20:32	2012-04-07 19:20:00	10	2012-02-10 17:27:59	0
858	2	2012-02-07 19:28:21	2012-04-07 19:28:00	10	2012-02-09 08:25:35	0
859	2	2012-02-07 19:54:42	2012-04-07 19:54:00	10	2012-02-09 07:32:31	0
860	5	2012-02-07 20:53:52	2012-04-07 20:53:00	24	2012-02-09 20:04:49	0
861	6	2012-02-07 23:40:57	2012-04-07 23:40:00	24	2012-02-12 13:19:40	0
862	6	2012-02-08 00:23:31	2012-04-08 00:23:00	24	2012-02-14 10:22:37	0
863	1	2012-02-08 01:56:53	2012-02-10 21:56:15	12		0
864	1	2012-02-08 03:34:10	2012-04-08 03:34:00	8	2012-02-09 12:09:03	0
865	1	2012-02-08 07:25:48	2012-02-12 15:25:00	12	2012-02-09 11:19:25	0
866	1	2012-02-08 08:43:23	2012-04-08 08:43:00	8	2012-02-09 11:06:44	0
867	7	2012-02-08 08:51:55	2012-04-08 08:51:00	24	2012-02-15 09:04:40	0
868	11	2012-02-08 08:50:18	2012-04-08 08:50:00	1	2012-02-15 18:23:55	1
869	1	2012-02-08 09:25:44	2012-04-08 09:25:00	8	2012-02-09 11:13:33	0
870	9	2012-02-08 09:22:39	2012-04-08 09:22:00	5	2012-02-11 12:56:21	0
871	6	2012-02-08 09:52:35	2012-04-08 09:52:00	24	2012-02-11 15:24:51	0
872	8	2012-02-08 09:24:02	2012-02-12 00:24:00	3		1
873	5	2012-02-08 10:51:38	2012-02-11 02:51:10	24		0
874	5	2012-02-08 11:45:11	2012-04-08 11:45:00	24	2012-02-11 12:56:41	0
875	2	2012-02-08 12:58:20	2012-04-08 12:58:00	10	2012-02-09 11:02:47	0
876	3	2012-02-08 12:10:09	2012-04-08 12:10:00	24	2012-02-10 16:00:11	0
877	3	2012-02-08 13:01:56	2012-02-11 11:01:01	24		0
878	1	2012-02-08 14:10:34	2012-04-08 14:10:00	8	2012-02-09 16:13:03	0
879	6	2012-02-08 17:58:43	2012-04-08 17:58:00	24	2012-02-14 07:38:36	0
880	6	2012-02-08 18:00:20	2012-04-08 18:00:00	24	2012-02-12 10:11:07	0
881	2	2012-02-08 19:17:19	2012-04-08 19:17:00	10	2012-02-10 13:28:10	0
882	6	2012-02-08 20:40:06	2012-02-11 07:39:40	24		0
883	6	2012-02-08 21:06:07	2012-04-08 21:06:00	24	2012-02-12 17:05:42	0
884	5	2012-02-08 22:06:05	2012-02-13 12:06:00	24	2012-02-11 08:41:01	0
885	6	2012-02-09 00:01:23	2012-02-13 03:00:34	24		0
886	1	2012-02-09 01:36:55	2012-04-09 01:36:00	12	2012-02-09 15:15:25	0
887	10	2012-02-09 04:15:50	2012-04-09 04:15:00	1	2012-02-13 03:56:02	2
888	3	2012-02-09 08:42:35	2012-04-09 08:42:00	24	2012-02-11 13:41:11	0
889	5	2012-02-09 09:05:31	2012-04-09 09:05:00	24	2012-02-11 11:58:03	0
890	5	2012-02-09 10:48:58	2012-04-09 10:48:00	24	2012-02-13 09:31:24	0
891	3	2012-02-09 11:22:00	2012-04-09 11:22:00	24	2012-02-11 11:29:40	0
892	1	2012-02-09 12:41:05	2012-04-09 12:41:00	12	2012-02-10 21:35:53	0
893	3	2012-02-09 12:47:30	2012-04-09 12:47:00	24	2012-02-11 11:36:54	0
894	1	2012-02-09 13:13:29	2012-04-09 13:13:00	12	2012-02-10 07:48:41	0
895	5	2012-02-09 13:13:12	2012-04-09 13:13:00	24	2012-02-13 15:10:15	0
896	4	2012-02-09 14:31:36	2012-04-09 14:31:00	12	2012-02-13 19:18:23	0
897	1	2012-02-09 14:14:53	2012-04-09 14:14:00	8	2012-02-09 16:35:16	0
898	1	2012-02-09 15:20:53	2012-04-09 15:20:00	12	2012-02-10 11:05:24	0
899	7	2012-02-09 18:14:50	2012-04-09 18:14:00	24	2012-02-16 13:08:25	0
900	1	2012-02-09 19:22:50	2012-02-14 15:22:00	8	2012-02-10 08:40:29	0
901	1	2012-02-09 20:09:14	2012-04-09 20:09:00	12	2012-02-10 10:20:09	0
902	1	2012-02-09 20:22:53	2012-04-09 20:22:00	8	2012-02-10 20:50:27	0
903	7	2012-02-09 21:45:30	2012-04-09 21:45:00	24	2012-02-25 21:05:30	0
904	6	2012-02-09 23:26:03	2012-04-09 23:26:00	24	2012-02-23 08:49:56	0
905	1	2012-02-10 00:11:38	2012-04-10 00:11:00	12	2012-02-10 12:56:35	0
906	1	2012-02-10 00:47:42	2012-02-12 01:47:00	8	2012-02-11 00:41:16	0
907	1	2012-02-10 01:43:32	2012-02-13 16:43:30	12		0
908	11	2012-02-10 04:53:05	2012-04-10 04:53:00	1	2012-02-17 03:29:53	4
909	6	2012-02-10 04:20:11	2012-04-10 04:20:00	24	2012-02-13 10:11:03	0
910	1	2012-02-10 08:41:47	2012-04-10 08:41:00	8	2012-02-10 09:03:21	0
911	1	2012-02-10 09:30:33	2012-02-12 15:29:40	8		0
912	8	2012-02-10 09:56:08	2012-04-10 09:56:00	3	2012-02-14 13:23:13	0
913	8	2012-02-10 09:14:00	2012-04-10 09:14:00	3	2012-02-14 12:50:26	0
914	9	2012-02-10 09:42:44	2012-04-10 09:42:00	5	2012-02-13 05:43:10	0
915	4	2012-02-10 09:03:41	2012-04-10 09:03:00	12	2012-02-11 05:30:46	0
916	4	2012-02-10 10:19:33	2012-04-10 10:19:00	12	2012-02-13 14:58:59	0
917	2	2012-02-10 10:11:04	2012-04-10 10:11:00	10	2012-02-11 16:32:59	0
918	1	2012-02-10 13:04:20	2012-04-10 13:04:00	8	2012-02-10 15:25:38	0
919	3	2012-02-10 14:42:56	2012-04-10 14:42:00	24	2012-02-13 13:47:02	0
920	5	2012-02-10 16:40:35	2012-04-10 16:40:00	24	2012-02-14 11:12:33	0
921	5	2012-02-10 16:38:45	2012-04-10 16:38:00	24	2012-02-14 15:42:09	0
922	5	2012-02-10 16:55:55	2012-04-10 16:55:00	24	2012-02-15 14:46:58	1
923	2	2012-02-10 17:29:44	2012-02-14 08:29:22	10		0
924	3	2012-02-10 17:58:20	2012-02-14 14:58:00	24	2012-02-13 12:24:06	0
925	5	2012-02-10 18:50:18	2012-02-12 19:50:09	24		0
926	5	2012-02-10 18:00:19	2012-04-10 18:00:00	24	2012-02-13 17:45:59	0
927	1	2012-02-10 18:26:03	2012-04-10 18:26:00	12	2012-02-11 11:22:57	0
928	1	2012-02-10 19:21:57	2012-04-10 19:21:00	8	2012-02-11 03:44:08	0
929	2	2012-02-10 21:16:52	2012-04-10 21:16:00	10	2012-02-11 06:40:13	0
930	4	2012-02-10 21:26:30	2012-02-13 10:26:01	12		0
931	1	2012-02-11 01:50:12	2012-04-11 01:50:00	12	2012-02-11 22:56:57	0
932	6	2012-02-11 04:27:31	2012-04-11 04:27:00	24	2012-02-13 18:41:52	0
933	3	2012-02-11 05:06:10	2012-04-11 05:06:00	24	2012-02-13 15:28:53	0
934	7	2012-02-11 08:32:53	2012-04-11 08:32:00	24	2012-02-16 19:16:45	0
935	6	2012-02-11 08:54:58	2012-04-11 08:54:00	24	2012-02-15 09:45:52	0
936	1	2012-02-11 11:56:03	2012-04-11 11:56:00	8	2012-02-11 21:57:35	0
937	4	2012-02-11 11:16:46	2012-02-13 13:16:41	12		0
938	7	2012-02-11 11:27:52	2012-02-15 03:27:00	24		0
939	4	2012-02-11 12:17:39	2012-04-11 12:17:00	12	2012-02-13 14:14:40	0
940	3	2012-02-11 12:50:42	2012-04-11 12:50:00	24	2012-02-13 14:34:33	0
941	5	2012-02-11 12:22:57	2012-04-11 12:22:00	24	2012-02-15 14:39:59	0
942	1	2012-02-11 15:43:24	2012-02-14 21:42:57	12		0
943	4	2012-02-11 16:56:09	2012-04-11 16:56:00	12	2012-02-14 12:39:49	0
944	2	2012-02-11 19:11:11	2012-04-11 19:11:00	10	2012-02-12 11:20:34	0
945	2	2012-02-11 19:50:08	2012-04-11 19:50:00	10	2012-02-13 08:13:10	0
946	1	2012-02-11 19:25:43	2012-04-11 19:25:00	12	2012-02-12 18:06:41	0
947	1	2012-02-11 20:57:42	2012-04-11 20:57:00	12	2012-02-13 16:06:35	0
948	5	2012-02-11 20:06:33	2012-04-11 20:06:00	24	2012-02-13 14:22:06	0
949	5	2012-02-11 21:38:34	2012-04-11 21:38:00	24	2012-02-15 23:18:59	0
950	10	2012-02-11 22:53:56	2012-04-11 22:53:00	1	2012-02-15 20:17:48	0
951	4	2012-02-12 02:28:01	2012-04-12 02:28:00	12	2012-02-15 07:13:56	0
952	4	2012-02-12 02:51:48	2012-04-12 02:51:00	12	2012-02-14 09:00:22	0
953	3	2012-02-12 03:41:01	2012-04-12 03:41:00	24	2012-02-13 04:13:00	0
954	2	2012-02-12 08:19:41	2012-04-12 08:19:00	10	2012-02-12 10:22:16	0
955	6	2012-02-12 09:38:15	2012-04-12 09:38:00	24	2012-02-15 14:02:21	0
956	8	2012-02-12 09:49:21	2012-04-12 09:49:00	3	2012-02-16 11:57:36	0
957	6	2012-02-12 10:48:01	2012-04-12 10:48:00	24	2012-02-18 12:32:42	0
958	3	2012-02-12 10:49:32	2012-02-14 11:49:00	24		0
959	1	2012-02-12 10:10:41	2012-04-12 10:10:00	12	2012-02-13 12:22:11	0
960	5	2012-02-12 11:57:47	2012-04-12 11:57:00	24	2012-02-16 09:51:40	0
961	8	2012-02-12 11:33:51	2012-04-12 11:33:00	3	2012-02-19 10:45:10	2
962	4	2012-02-12 13:37:43	2012-04-12 13:37:00	12	2012-02-14 09:48:26	0
963	1	2012-02-12 13:54:43	2012-04-12 13:54:00	8	2012-02-13 13:21:39	0
964	1	2012-02-12 13:29:36	2012-04-12 13:29:00	8	2012-02-13 15:58:09	0
965	7	2012-02-12 13:05:45	2012-04-12 13:05:00	24	2012-03-24 01:58:43	0
966	3	2012-02-12 13:22:46	2012-04-12 13:22:00	24	2012-02-14 09:25:03	0
967	2	2012-02-12 14:19:32	2012-04-12 14:19:00	10	2012-02-13 17:43:23	0
968	2	2012-02-12 14:24:05	2012-02-17 11:24:01	10		0
969	2	2012-02-12 14:53:41	2012-04-12 14:53:00	10	2012-02-13 09:43:04	0
970	6	2012-02-12 16:30:02	2012-04-12 16:30:00	24	2012-02-24 08:29:09	0
971	3	2012-02-12 16:36:34	2012-04-12 16:36:00	24	2012-02-15 19:52:25	0
972	1	2012-02-12 17:50:02	2012-04-12 17:50:00	8	2012-02-12 21:40:45	0
973	1	2012-02-12 18:47:02	2012-02-16 05:46:51	8		0
974	2	2012-02-12 19:07:00	2012-04-12 19:07:00	10	2012-02-15 03:49:01	0
975	2	2012-02-12 19:13:34	2012-04-12 19:13:00	10	2012-02-14 09:28:02	0
976	1	2012-02-12 20:55:47	2012-04-12 20:55:00	8	2012-02-13 00:06:06	0
977	6	2012-02-12 20:55:58	2012-02-16 11:55:36	24		0
978	6	2012-02-12 21:31:17	2012-04-12 21:31:00	24	2012-02-16 14:32:55	0
979	11	2012-02-12 22:51:53	2012-04-12 22:51:00	1	2012-02-20 08:41:17	2
980	4	2012-02-13 02:34:25	2012-04-13 02:34:00	12	2012-02-15 08:33:08	0
981	3	2012-02-13 03:48:38	2012-04-13 03:48:00	24	2012-02-14 15:37:19	0
982	6	2012-02-13 03:40:59	2012-02-16 03:40:15	24		0
983	1	2012-02-13 07:39:03	2012-04-13 07:39:00	12	2012-02-14 16:09:12	0
984	3	2012-02-13 08:49:44	2012-04-13 08:49:00	24	2012-02-15 16:43:38	0
985	4	2012-02-13 09:23:15	2012-04-13 09:23:00	12	2012-02-14 15:36:28	0
986	6	2012-02-13 09:16:11	2012-04-13 09:16:00	24	2012-02-16 11:12:24	0
987	1	2012-02-13 10:28:15	2012-04-13 10:28:00	12	2012-02-14 14:34:18	0
988	4	2012-02-13 10:56:51	2012-04-13 10:56:00	12	2012-02-16 11:54:14	0
989	7	2012-02-13 10:13:51	2012-04-13 10:13:00	24	2012-02-22 09:41:58	0
990	5	2012-02-13 10:09:47	2012-02-15 23:09:40	24		0
991	1	2012-02-13 10:44:23	2012-04-13 10:44:00	8	2012-02-14 15:51:22	0
992	1	2012-02-13 10:26:40	2012-04-13 10:26:00	8	2012-02-14 16:29:16	0
993	4	2012-02-13 10:23:27	2012-02-17 20:23:00	12	2012-02-16 16:35:22	0
994	1	2012-02-13 11:37:17	2012-02-16 19:37:10	8		0
995	1	2012-02-13 14:32:31	2012-02-16 02:31:43	12		0
996	5	2012-02-13 14:18:08	2012-02-16 14:17:24	24		0
997	4	2012-02-13 14:03:27	2012-04-13 14:03:00	12	2012-02-17 15:58:24	0
998	1	2012-02-13 16:39:14	2012-04-13 16:39:00	8	2012-02-14 11:00:44	0
999	1	2012-02-13 16:53:05	2012-04-13 16:53:00	12	2012-02-14 06:10:16	0
1000	3	2012-02-13 17:14:55	2012-04-13 17:14:00	24	2012-02-16 09:12:02	0
1001	2	2012-02-13 17:49:29	2012-04-13 17:49:00	10	2012-02-15 12:25:21	0
1002	1	2012-02-13 17:48:21	2012-04-13 17:48:00	8	2012-02-14 10:07:15	0
1003	1	2012-02-13 17:05:57	2012-02-16 10:05:40	8		0
1004	11	2012-02-13 17:46:44	2012-04-13 17:46:00	1	2012-02-20 11:48:42	1
1005	8	2012-02-13 18:11:01	2012-04-13 18:11:00	3	2012-02-18 15:30:47	0
1006	5	2012-02-13 18:35:18	2012-04-13 18:35:00	24	2012-02-16 14:47:03	0
1007	6	2012-02-13 18:09:16	2012-04-13 18:09:00	24	2012-02-18 07:03:04	0
1008	1	2012-02-13 20:18:06	2012-04-13 20:18:00	12	2012-02-15 14:29:41	0
1009	1	2012-02-13 20:39:26	2012-04-13 20:39:00	12	2012-02-15 23:10:52	0
1010	1	2012-02-13 20:43:20	2012-04-13 20:43:00	8	2012-02-13 22:37:41	0
1011	6	2012-02-13 20:55:48	2012-04-13 20:55:00	24	2012-02-26 14:38:35	1
1012	6	2012-02-13 23:58:47	2012-04-13 23:58:00	24	2012-02-20 16:08:22	0
1013	1	2012-02-13 23:32:20	2012-04-13 23:32:00	8	2012-02-14 22:37:37	0
1014	2	2012-02-13 23:37:30	2012-04-13 23:37:00	10	2012-02-14 08:49:34	0
1015	1	2012-02-14 01:17:48	2012-04-14 01:17:00	12	2012-02-14 18:24:20	0
1016	3	2012-02-14 07:44:21	2012-04-14 07:44:00	24	2012-02-17 14:11:53	0
1017	5	2012-02-14 09:12:01	2012-02-16 23:12:00	24	2012-02-16 11:45:54	0
1018	4	2012-02-14 10:41:22	2012-02-16 22:40:34	12		0
1019	6	2012-02-14 10:08:20	2012-04-14 10:08:00	24	2012-02-21 11:23:42	0
1020	4	2012-02-14 10:46:42	2012-04-14 10:46:00	12	2012-02-17 12:41:52	0
1021	1	2012-02-14 11:47:51	2012-04-14 11:47:00	8	2012-02-14 13:50:16	0
1022	7	2012-02-14 13:55:33	2012-04-14 13:55:00	24	2012-03-12 11:18:31	1
1023	6	2012-02-14 13:23:10	2012-04-14 13:23:00	24	2012-02-20 13:57:57	0
1024	1	2012-02-14 13:30:04	2012-02-17 03:29:20	8		0
1025	5	2012-02-14 13:51:51	2012-02-18 00:51:41	24		0
1026	1	2012-02-14 14:31:27	2012-04-14 14:31:00	12	2012-02-15 15:30:36	0
1027	2	2012-02-14 16:09:50	2012-04-14 16:09:00	10	2012-02-16 09:48:57	0
1028	5	2012-02-14 16:06:51	2012-04-14 16:06:00	24	2012-02-19 08:37:49	0
1029	4	2012-02-14 16:44:20	2012-04-14 16:44:00	12	2012-02-18 12:06:53	0
1030	4	2012-02-14 16:58:53	2012-04-14 16:58:00	12	2012-02-17 15:17:49	0
1031	6	2012-02-14 18:47:46	2012-04-14 18:47:00	24	2012-02-18 17:51:01	0
1032	1	2012-02-14 20:29:41	2012-02-19 12:29:11	12		0
1033	1	2012-02-14 20:37:47	2012-02-18 11:37:45	12		0
1034	1	2012-02-14 21:01:31	2012-04-14 21:01:00	8	2012-02-15 21:48:33	0
1035	11	2012-02-14 22:38:22	2012-02-17 14:38:04	1		4
1036	6	2012-02-15 03:01:41	2012-04-15 03:01:00	24	2012-03-05 08:19:40	0
1037	3	2012-02-15 05:04:14	2012-04-15 05:04:00	24	2012-02-18 09:31:00	0
1038	5	2012-02-15 07:25:48	2012-04-15 07:25:00	24	2012-02-17 09:11:17	0
1039	2	2012-02-15 10:10:03	2012-04-15 10:10:00	10	2012-02-16 18:10:28	0
1040	7	2012-02-15 10:48:15	2012-04-15 10:48:00	24	2012-03-02 12:26:30	0
1041	3	2012-02-15 10:15:29	2012-04-15 10:15:00	24	2012-02-17 11:15:48	0
1042	4	2012-02-15 10:27:42	2012-02-18 06:27:00	12	2012-02-17 12:41:49	0
1043	11	2012-02-15 10:19:11	2012-04-15 10:19:00	1	2012-02-22 11:42:58	1
1044	3	2012-02-15 10:46:33	2012-04-15 10:46:00	24	2012-02-17 17:41:12	0
1045	2	2012-02-15 10:56:27	2012-04-15 10:56:00	10	2012-02-16 12:30:57	0
1046	1	2012-02-15 11:47:18	2012-04-15 11:47:00	12	2012-02-16 00:57:10	0
1047	5	2012-02-15 13:06:22	2012-04-15 13:06:00	24	2012-02-19 01:23:45	0
1048	1	2012-02-15 13:07:34	2012-04-15 13:07:00	8	2012-02-16 12:12:40	0
1049	4	2012-02-15 14:37:31	2012-04-15 14:37:00	12	2012-02-19 15:13:24	0
1050	7	2012-02-15 14:33:35	2012-02-20 10:32:58	24		0
1051	6	2012-02-15 15:38:45	2012-04-15 15:38:00	24	2012-02-27 00:00:07	0
1052	1	2012-02-15 17:55:58	2012-04-15 17:55:00	8	2012-02-16 15:15:04	0
1053	11	2012-02-15 17:04:15	2012-04-15 17:04:00	1	2012-02-22 18:01:41	0
1054	1	2012-02-15 17:24:13	2012-04-15 17:24:00	12	2012-02-16 12:45:04	0
1055	1	2012-02-15 18:34:05	2012-02-18 05:34:00	12	2012-02-16 11:38:40	0
1056	11	2012-02-15 21:17:03	2012-04-15 21:17:00	1	2012-02-23 06:28:15	2
1057	4	2012-02-15 21:06:30	2012-04-15 21:06:00	12	2012-02-17 14:45:00	0
1058	6	2012-02-15 23:26:45	2012-04-15 23:26:00	24	2012-02-21 16:09:39	0
1059	1	2012-02-15 23:01:31	2012-04-15 23:01:00	8	2012-02-16 15:05:23	0
1060	1	2012-02-16 00:17:10	2012-04-16 00:17:00	8	2012-02-17 00:52:15	0
1061	1	2012-02-16 00:39:00	2012-04-16 00:39:00	8	2012-02-16 14:01:01	0
1062	5	2012-02-16 08:44:39	2012-04-16 08:44:00	24	2012-02-18 15:34:23	0
1063	3	2012-02-16 10:42:02	2012-04-16 10:42:00	24	2012-02-18 16:46:50	0
1064	5	2012-02-16 10:39:37	2012-04-16 10:39:00	24	2012-02-20 15:56:42	0
1065	1	2012-02-16 10:31:49	2012-04-16 10:31:00	8	2012-02-17 10:44:19	0
1066	2	2012-02-16 11:48:01	2012-02-19 07:47:33	10		0
1067	7	2012-02-16 11:22:41	2012-04-16 11:22:00	24	2012-02-29 13:08:29	0
1068	2	2012-02-16 13:55:48	2012-04-16 13:55:00	10	2012-02-17 08:09:23	0
1069	1	2012-02-16 13:21:10	2012-04-16 13:21:00	8	2012-02-17 09:02:51	0
1070	7	2012-02-16 13:25:33	2012-04-16 13:25:00	24	2012-03-07 15:46:05	1
1071	2	2012-02-16 14:23:58	2012-02-21 03:23:00	10	2012-02-17 16:51:21	0
1072	1	2012-02-16 15:00:02	2012-04-16 15:00:00	12	2012-02-17 07:26:52	0
1073	7	2012-02-16 16:05:13	2012-04-16 16:05:00	24	2012-03-14 09:55:53	1
1074	1	2012-02-16 17:51:30	2012-04-16 17:51:00	8	2012-02-16 21:55:46	0
1075	2	2012-02-16 17:38:15	2012-04-16 17:38:00	10	2012-02-17 15:07:00	0
1076	1	2012-02-16 21:55:06	2012-02-19 02:54:39	8		0
1077	7	2012-02-17 01:25:18	2012-04-17 01:25:00	24	2012-03-07 14:11:07	0
1078	6	2012-02-17 04:52:49	2012-04-17 04:52:00	24	2012-02-19 21:28:45	0
1079	7	2012-02-17 06:07:34	2012-04-17 06:07:00	24	2012-02-24 17:34:23	0
1080	3	2012-02-17 07:33:00	2012-04-17 07:33:00	24	2012-02-19 17:17:25	0
1081	3	2012-02-17 08:51:21	2012-04-17 08:51:00	24	2012-02-19 15:42:34	0
1082	3	2012-02-17 08:34:59	2012-02-19 15:34:34	24		0
1083	2	2012-02-17 08:41:32	2012-04-17 08:41:00	10	2012-02-17 12:07:41	0
1084	8	2012-02-17 08:08:25	2012-02-19 19:08:00	3		0
1085	3	2012-02-17 08:52:04	2012-04-17 08:52:00	24	2012-02-19 11:13:11	0
1086	5	2012-02-17 12:52:57	2012-04-17 12:52:00	24	2012-02-21 02:20:53	0
1087	1	2012-02-17 13:30:25	2012-04-17 13:30:00	8	2012-02-18 20:08:36	0
1088	6	2012-02-17 14:05:37	2012-04-17 14:05:00	24	2012-02-24 18:56:03	0
1089	1	2012-02-17 14:53:41	2012-02-20 20:53:15	8		0
1090	1	2012-02-17 14:08:32	2012-04-17 14:08:00	8	2012-02-18 09:56:29	0
1091	10	2012-02-17 15:15:12	2012-04-17 15:15:00	1	2012-02-24 11:13:31	5
1092	2	2012-02-17 16:52:35	2012-04-17 16:52:00	10	2012-02-18 13:13:34	0
1093	1	2012-02-17 16:24:56	2012-04-17 16:24:00	8	2012-02-18 11:46:42	0
1094	4	2012-02-17 16:28:49	2012-04-17 16:28:00	12	2012-02-21 14:43:11	0
1095	3	2012-02-17 17:13:51	2012-04-17 17:13:00	24	2012-02-20 17:12:50	0
1096	3	2012-02-17 17:36:31	2012-02-22 13:35:54	24		0
1097	1	2012-02-17 17:50:24	2012-04-17 17:50:00	8	2012-02-18 06:17:31	0
1098	4	2012-02-17 19:01:47	2012-02-21 11:00:55	12		0
1099	1	2012-02-17 20:50:11	2012-02-20 06:49:29	12		0
1100	1	2012-02-18 00:18:08	2012-04-18 00:18:00	8	2012-02-18 12:13:11	0
1101	1	2012-02-18 01:10:19	2012-04-18 01:10:00	8	2012-02-18 08:12:17	0
1102	10	2012-02-18 06:09:01	2012-04-18 06:09:00	1	2012-02-25 15:48:45	2
1103	2	2012-02-18 08:10:28	2012-02-21 09:09:32	10		0
1104	9	2012-02-18 09:37:31	2012-04-18 09:37:00	5	2012-02-21 11:33:29	0
1105	7	2012-02-18 10:55:53	2012-04-18 10:55:00	24	2012-03-02 12:50:56	0
1106	2	2012-02-18 10:03:36	2012-04-18 10:03:00	10	2012-02-19 16:27:07	0
1107	1	2012-02-18 10:30:35	2012-04-18 10:30:00	8	2012-02-19 15:38:41	0
1108	3	2012-02-18 11:12:18	2012-04-18 11:12:00	24	2012-02-20 12:39:11	0
1109	2	2012-02-18 11:14:09	2012-02-21 08:13:44	10		0
1110	1	2012-02-18 11:47:13	2012-04-18 11:47:00	8	2012-02-19 10:44:15	0
1111	3	2012-02-18 12:29:27	2012-04-18 12:29:00	24	2012-02-20 09:45:00	0
1112	1	2012-02-18 14:08:00	2012-02-21 03:07:01	12		0
1113	3	2012-02-18 14:13:53	2012-04-18 14:13:00	24	2012-02-21 19:23:56	0
1114	1	2012-02-18 14:52:53	2012-04-18 14:52:00	8	2012-02-18 17:05:46	0
1115	4	2012-02-18 14:31:35	2012-04-18 14:31:00	12	2012-02-21 20:22:29	0
1116	4	2012-02-18 15:10:13	2012-04-18 15:10:00	12	2012-02-21 14:00:19	0
1117	1	2012-02-18 15:14:02	2012-04-18 15:14:00	8	2012-02-19 15:31:42	0
1118	5	2012-02-18 16:32:29	2012-04-18 16:32:00	24	2012-02-22 09:31:34	0
1119	2	2012-02-18 17:43:42	2012-04-18 17:43:00	10	2012-02-19 18:26:27	0
1120	5	2012-02-18 20:43:38	2012-02-21 20:42:57	24		0
1121	4	2012-02-18 21:13:26	2012-04-18 21:13:00	12	2012-02-20 20:22:05	0
1122	7	2012-02-19 01:09:17	2012-04-19 01:09:00	24	2012-02-24 12:14:02	0
1123	1	2012-02-19 04:26:13	2012-04-19 04:26:00	8	2012-02-19 23:06:15	0
1124	1	2012-02-19 04:49:50	2012-04-19 04:49:00	8	2012-02-19 10:48:25	0
1125	1	2012-02-19 07:51:09	2012-04-19 07:51:00	8	2012-02-20 10:18:19	0
1126	3	2012-02-19 08:21:10	2012-04-19 08:21:00	24	2012-02-21 10:11:48	0
1127	5	2012-02-19 09:18:31	2012-04-19 09:18:00	24	2012-02-20 15:08:06	0
1128	4	2012-02-19 09:39:21	2012-04-19 09:39:00	12	2012-02-20 08:58:21	0
1129	1	2012-02-19 10:48:05	2012-04-19 10:48:00	8	2012-02-20 15:25:56	0
1130	4	2012-02-19 10:27:14	2012-02-21 13:27:04	12		0
1131	1	2012-02-19 12:00:33	2012-04-19 12:00:00	8	2012-02-20 17:43:10	0
1132	2	2012-02-19 14:13:49	2012-02-23 09:13:25	10		0
1133	7	2012-02-19 14:32:14	2012-04-19 14:32:00	24	2012-03-06 20:38:40	1
1134	1	2012-02-19 14:41:17	2012-04-19 14:41:00	8	2012-02-20 09:56:51	0
1135	4	2012-02-19 15:26:00	2012-04-19 15:26:00	12	2012-02-22 09:28:59	0
1136	4	2012-02-19 15:50:18	2012-04-19 15:50:00	12	2012-02-24 02:05:24	0
1137	6	2012-02-19 15:50:20	2012-04-19 15:50:00	24	2012-03-01 14:36:44	0
1138	1	2012-02-19 16:33:01	2012-02-21 21:32:34	8		0
1139	1	2012-02-19 17:20:40	2012-04-19 17:20:00	8	2012-02-19 21:24:04	0
1140	1	2012-02-19 17:57:43	2012-04-19 17:57:00	8	2012-02-20 09:51:31	0
1141	2	2012-02-19 17:50:49	2012-04-19 17:50:00	10	2012-02-20 09:47:13	0
1142	4	2012-02-19 18:13:13	2012-04-19 18:13:00	12	2012-02-21 07:13:09	0
1143	7	2012-02-19 19:48:32	2012-04-19 19:48:00	24	2012-03-03 13:39:47	0
1144	5	2012-02-19 20:05:53	2012-04-19 20:05:00	24	2012-02-22 13:44:49	0
1145	7	2012-02-19 21:46:23	2012-04-19 21:46:00	24	2012-03-06 21:42:59	0
1146	10	2012-02-19 22:23:11	2012-04-19 22:23:00	1	2012-02-26 11:15:23	4
1147	1	2012-02-20 01:27:59	2012-02-24 09:28:00	12	2012-02-20 22:38:54	0
1148	7	2012-02-20 01:37:56	2012-04-20 01:37:00	24	2012-02-23 12:02:42	0
1149	5	2012-02-20 05:41:38	2012-04-20 05:41:00	24	2012-02-24 10:49:44	0
1150	1	2012-02-20 06:03:43	2012-04-20 06:03:00	12	2012-02-21 09:35:31	0
1151	3	2012-02-20 07:08:29	2012-04-20 07:08:00	24	2012-02-22 17:41:47	0
1152	1	2012-02-20 11:28:30	2012-02-22 21:27:39	12		0
1153	4	2012-02-20 11:22:01	2012-02-22 21:21:10	12		0
1154	6	2012-02-20 12:32:48	2012-04-20 12:32:00	24	2012-02-26 18:56:17	0
1155	5	2012-02-20 12:38:15	2012-04-20 12:38:00	24	2012-02-24 03:43:21	0
1156	1	2012-02-20 14:30:12	2012-04-20 14:30:00	8	2012-02-20 15:46:09	0
1157	3	2012-02-20 14:55:34	2012-04-20 14:55:00	24	2012-02-23 10:24:20	0
1158	1	2012-02-20 16:47:21	2012-02-23 22:46:54	8		0
1159	10	2012-02-20 17:51:39	2012-02-23 13:51:00	1		1
1160	3	2012-02-20 17:08:50	2012-04-20 17:08:00	24	2012-02-23 11:46:54	0
1161	3	2012-02-20 18:44:23	2012-04-20 18:44:00	24	2012-02-22 17:22:10	0
1162	1	2012-02-20 19:40:37	2012-04-20 19:40:00	12	2012-02-21 12:31:13	0
1163	7	2012-02-20 21:48:10	2012-04-20 21:48:00	24	2012-03-07 15:33:55	0
1164	11	2012-02-20 22:35:18	2012-04-20 22:35:00	1	2012-02-27 14:20:20	0
1165	5	2012-02-20 23:32:05	2012-04-20 23:32:00	24	2012-02-22 13:23:57	0
1166	1	2012-02-21 00:29:08	2012-04-21 00:29:00	12	2012-02-22 11:52:34	0
1167	7	2012-02-21 01:25:11	2012-02-23 07:24:18	24		0
1168	6	2012-02-21 03:49:37	2012-04-21 03:49:00	24	2012-02-28 11:23:01	0
1169	6	2012-02-21 06:20:14	2012-02-23 12:19:21	24		0
1170	4	2012-02-21 08:00:43	2012-04-21 08:00:00	12	2012-02-23 17:20:10	0
1171	1	2012-02-21 10:56:30	2012-04-21 10:56:00	8	2012-02-21 11:20:53	0
1172	2	2012-02-21 11:16:19	2012-04-21 11:16:00	10	2012-02-22 08:40:15	0
1173	4	2012-02-21 11:55:00	2012-04-21 11:55:00	12	2012-02-24 08:41:33	0
1174	4	2012-02-21 11:14:36	2012-02-23 13:14:00	12		0
1175	1	2012-02-21 11:10:29	2012-02-23 13:09:51	12		0
1176	2	2012-02-21 12:03:42	2012-04-21 12:03:00	10	2012-02-22 09:45:44	0
1177	1	2012-02-21 12:50:34	2012-04-21 12:50:00	8	2012-02-22 14:13:39	0
1178	6	2012-02-21 13:40:19	2012-04-21 13:40:00	24	2012-02-28 13:27:39	0
1179	5	2012-02-21 13:48:32	2012-04-21 13:48:00	24	2012-02-25 12:34:27	0
1180	1	2012-02-21 15:57:33	2012-04-21 15:57:00	8	2012-02-22 09:31:38	0
1181	11	2012-02-21 17:25:11	2012-04-21 17:25:00	1	2012-02-28 17:24:10	3
1182	2	2012-02-21 17:30:56	2012-04-21 17:30:00	10	2012-02-23 11:17:50	0
1183	5	2012-02-21 20:01:36	2012-04-21 20:01:00	24	2012-02-24 11:29:46	0
1184	5	2012-02-21 20:03:04	2012-04-21 20:03:00	24	2012-02-24 10:18:47	0
1185	2	2012-02-21 21:38:43	2012-04-21 21:38:00	10	2012-02-23 06:29:47	0
1186	4	2012-02-21 21:43:27	2012-04-21 21:43:00	12	2012-02-23 11:08:45	0
1187	5	2012-02-22 03:56:55	2012-02-25 14:56:00	24		0
1188	1	2012-02-22 04:51:15	2012-04-22 04:51:00	8	2012-02-23 12:34:13	0
1189	1	2012-02-22 07:04:27	2012-04-22 07:04:00	12	2012-02-23 10:37:59	0
1190	3	2012-02-22 08:34:21	2012-04-22 08:34:00	24	2012-02-24 09:49:27	0
1191	7	2012-02-22 08:38:29	2012-04-22 08:38:00	24	2012-02-27 11:12:46	0
1192	9	2012-02-22 09:08:31	2012-04-22 09:08:00	5	2012-02-25 11:57:19	0
1193	2	2012-02-22 10:51:20	2012-04-22 10:51:00	10	2012-02-23 09:27:35	0
1194	6	2012-02-22 10:39:30	2012-04-22 10:39:00	24	2012-02-28 12:45:30	0
1195	2	2012-02-22 10:26:35	2012-04-22 10:26:00	10	2012-02-23 11:23:31	0
1196	5	2012-02-22 12:18:29	2012-04-22 12:18:00	24	2012-02-26 12:53:11	0
1197	4	2012-02-22 12:01:51	2012-04-22 12:01:00	12	2012-02-25 03:37:24	0
1198	4	2012-02-22 12:02:53	2012-04-22 12:02:00	12	2012-02-25 14:35:13	0
1199	5	2012-02-22 12:43:23	2012-04-22 12:43:00	24	2012-02-25 14:22:24	0
1200	2	2012-02-22 13:23:27	2012-04-22 13:23:00	10	2012-02-23 08:24:18	0
1201	2	2012-02-22 13:29:43	2012-02-26 00:29:00	10	2012-02-23 15:56:09	0
1202	7	2012-02-22 13:03:56	2012-04-22 13:03:00	24	2012-03-20 10:40:42	1
1203	1	2012-02-22 15:03:34	2012-04-22 15:03:00	8	2012-02-23 15:04:18	0
1204	4	2012-02-22 16:30:48	2012-04-22 16:30:00	12	2012-02-25 13:14:52	0
1205	3	2012-02-22 17:30:10	2012-04-22 17:30:00	24	2012-02-25 17:31:37	0
1206	8	2012-02-22 18:51:23	2012-04-22 18:51:00	3	2012-02-27 07:00:56	0
1207	6	2012-02-22 18:01:28	2012-04-22 18:01:00	24	2012-02-26 06:37:30	0
1208	6	2012-02-22 18:40:02	2012-04-22 18:40:00	24	2012-02-26 07:17:19	0
1209	1	2012-02-22 19:26:32	2012-02-24 22:26:22	8		0
1210	1	2012-02-22 20:56:31	2012-04-22 20:56:00	8	2012-02-23 12:31:20	0
1211	2	2012-02-22 21:40:18	2012-04-22 21:40:00	10	2012-02-23 13:36:57	0
1212	5	2012-02-22 23:28:37	2012-04-22 23:28:00	24	2012-02-25 11:56:19	0
1213	6	2012-02-23 06:19:21	2012-04-23 06:19:00	24	2012-02-27 13:14:55	0
1214	1	2012-02-23 08:04:47	2012-04-23 08:04:00	8	2012-02-23 17:26:37	0
1215	4	2012-02-23 11:04:25	2012-02-26 08:03:29	12		0
1216	2	2012-02-23 11:50:16	2012-04-23 11:50:00	10	2012-02-24 11:10:45	0
1217	4	2012-02-23 11:38:44	2012-04-23 11:38:00	12	2012-02-26 17:18:12	0
1218	5	2012-02-23 12:09:03	2012-04-23 12:09:00	24	2012-02-27 09:23:58	0
1219	2	2012-02-23 14:06:31	2012-04-23 14:06:00	10	2012-02-25 16:29:10	0
1220	4	2012-02-23 14:49:00	2012-04-23 14:49:00	12	2012-02-27 17:41:03	1
1221	1	2012-02-23 14:04:24	2012-04-23 14:04:00	8	2012-02-24 18:52:42	0
1222	3	2012-02-23 16:28:25	2012-04-23 16:28:00	24	2012-02-26 08:32:44	0
1223	2	2012-02-23 19:27:50	2012-04-23 19:27:00	10	2012-02-25 07:44:29	0
1224	5	2012-02-23 20:12:37	2012-04-23 20:12:00	24	2012-02-26 10:19:28	0
1225	6	2012-02-23 20:22:21	2012-04-23 20:22:00	24	2012-02-27 12:10:14	0
1226	6	2012-02-23 21:40:00	2012-04-23 21:40:00	24	2012-02-27 20:34:28	0
1227	3	2012-02-24 03:03:02	2012-02-27 08:03:00	24	2012-02-26 12:52:33	0
1228	10	2012-02-24 06:40:30	2012-04-24 06:40:00	1	2012-03-02 15:43:54	1
1229	5	2012-02-24 08:31:46	2012-04-24 08:31:00	24	2012-02-27 18:56:50	0
1230	8	2012-02-24 09:26:00	2012-04-24 09:26:00	3	2012-02-27 15:21:27	0
1231	7	2012-02-24 10:35:33	2012-04-24 10:35:00	24	2012-03-15 11:22:36	1
1232	1	2012-02-24 11:26:40	2012-04-24 11:26:00	12	2012-02-25 11:35:59	0
1233	3	2012-02-24 11:38:12	2012-04-24 11:38:00	24	2012-02-27 13:28:54	0
1234	1	2012-02-24 12:00:57	2012-04-24 12:00:00	8	2012-02-25 11:44:37	0
1235	3	2012-02-24 12:45:26	2012-04-24 12:45:00	24	2012-02-26 12:08:27	0
1236	7	2012-02-24 14:09:36	2012-02-27 02:09:00	24		0
1237	4	2012-02-24 15:11:32	2012-02-29 12:11:29	12		0
1238	5	2012-02-24 17:31:16	2012-04-24 17:31:00	24	2012-02-28 17:00:22	0
1239	1	2012-02-24 17:35:11	2012-02-29 00:35:00	8	2012-02-25 15:20:42	0
1240	3	2012-02-24 17:27:38	2012-04-24 17:27:00	24	2012-02-27 06:41:41	0
1241	1	2012-02-24 18:41:08	2012-04-24 18:41:00	12	2012-02-25 14:39:10	0
1242	2	2012-02-24 19:24:06	2012-04-24 19:24:00	10	2012-02-26 08:33:43	0
1243	1	2012-02-24 19:37:21	2012-04-24 19:37:00	12	2012-02-26 03:11:52	0
1244	1	2012-02-24 19:29:21	2012-04-24 19:29:00	8	2012-02-25 03:46:52	0
1245	6	2012-02-24 20:20:51	2012-04-24 20:20:00	24	2012-03-02 14:26:28	0
1246	6	2012-02-25 00:34:46	2012-04-25 00:34:00	24	2012-03-06 18:17:22	0
1247	3	2012-02-25 02:16:19	2012-04-25 02:16:00	24	2012-02-26 18:01:15	0
1248	3	2012-02-25 02:15:46	2012-04-25 02:15:00	24	2012-02-27 09:14:03	0
1249	3	2012-02-25 05:49:01	2012-02-29 03:49:00	24	2012-02-27 15:50:19	0
1250	6	2012-02-25 09:06:19	2012-04-25 09:06:00	24	2012-02-28 11:31:38	0
1251	1	2012-02-25 09:07:50	2012-02-29 09:07:39	8		0
1252	4	2012-02-25 10:08:11	2012-04-25 10:08:00	12	2012-02-28 17:42:52	0
1253	6	2012-02-25 11:04:49	2012-04-25 11:04:00	24	2012-03-03 17:47:42	0
1254	2	2012-02-25 11:04:46	2012-04-25 11:04:00	10	2012-02-26 12:17:06	0
1255	4	2012-02-25 11:32:13	2012-04-25 11:32:00	12	2012-02-28 11:47:25	0
1256	5	2012-02-25 12:15:48	2012-04-25 12:15:00	24	2012-02-29 02:19:02	0
1257	4	2012-02-25 16:00:46	2012-04-25 16:00:00	12	2012-02-28 11:39:27	0
1258	2	2012-02-25 17:06:19	2012-04-25 17:06:00	10	2012-02-26 13:27:30	0
1259	6	2012-02-25 23:47:41	2012-04-25 23:47:00	24	2012-03-02 20:53:47	0
1260	1	2012-02-26 07:57:54	2012-04-26 07:57:00	12	2012-02-27 09:54:13	0
1261	9	2012-02-26 09:57:53	2012-04-26 09:57:00	5	2012-02-29 11:40:04	0
1262	6	2012-02-26 10:02:44	2012-03-01 16:02:26	24		0
1263	2	2012-02-26 10:49:51	2012-04-26 10:49:00	10	2012-02-27 16:11:51	0
1264	4	2012-02-26 10:18:33	2012-04-26 10:18:00	12	2012-02-29 15:05:46	0
1265	1	2012-02-26 11:05:44	2012-04-26 11:05:00	12	2012-02-27 08:07:19	0
1266	4	2012-02-26 12:21:57	2012-02-29 16:21:20	12		0
1267	7	2012-02-26 12:42:36	2012-04-26 12:42:00	24	2012-03-07 12:06:34	0
1268	4	2012-02-26 13:22:32	2012-04-26 13:22:00	12	2012-02-29 12:13:29	0
1269	2	2012-02-26 13:12:19	2012-04-26 13:12:00	10	2012-02-27 13:56:17	0
1270	3	2012-02-26 15:10:34	2012-04-26 15:10:00	24	2012-02-29 11:33:49	0
1271	1	2012-02-26 15:38:24	2012-04-26 15:38:00	12	2012-02-27 14:11:57	0
1272	6	2012-02-26 17:30:08	2012-04-26 17:30:00	24	2012-03-03 15:40:26	0
1273	1	2012-02-26 17:50:32	2012-04-26 17:50:00	12	2012-02-27 07:39:57	0
1274	1	2012-02-26 17:23:47	2012-04-26 17:23:00	8	2012-02-27 10:46:59	0
1275	3	2012-02-26 17:53:24	2012-04-26 17:53:00	24	2012-02-29 10:01:13	0
1276	1	2012-02-26 17:48:42	2012-02-29 00:48:40	8		0
1277	1	2012-02-26 17:35:19	2012-04-26 17:35:00	12	2012-02-27 21:36:04	0
1278	1	2012-02-26 18:55:10	2012-04-26 18:55:00	12	2012-02-27 11:54:02	0
1279	6	2012-02-26 20:00:10	2012-04-26 20:00:00	24	2012-03-08 20:51:43	0
1280	1	2012-02-26 20:17:14	2012-04-26 20:17:00	8	2012-02-27 11:00:07	0
1281	4	2012-02-26 21:38:07	2012-04-26 21:38:00	12	2012-02-28 21:21:24	0
1282	2	2012-02-26 21:05:17	2012-04-26 21:05:00	10	2012-02-26 23:53:05	0
1283	1	2012-02-27 01:58:29	2012-04-27 01:58:00	12	2012-02-28 09:17:56	0
1284	6	2012-02-27 03:00:06	2012-04-27 03:00:00	24	2012-03-04 09:32:37	0
1285	2	2012-02-27 06:47:33	2012-04-27 06:47:00	10	2012-02-29 15:20:36	0
1286	2	2012-02-27 08:41:30	2012-04-27 08:41:00	10	2012-02-28 11:26:14	0
1287	7	2012-02-27 08:15:12	2012-04-27 08:15:00	24	2012-03-07 10:15:43	0
1288	2	2012-02-27 08:34:38	2012-04-27 08:34:00	10	2012-02-27 17:51:36	0
1289	4	2012-02-27 10:13:57	2012-04-27 10:13:00	12	2012-03-01 18:03:26	0
1290	1	2012-02-27 11:18:11	2012-04-27 11:18:00	12	2012-02-28 04:33:00	0
1291	1	2012-02-27 12:41:38	2012-04-27 12:41:00	8	2012-02-28 13:17:20	0
1292	4	2012-02-27 12:58:22	2012-02-29 22:57:32	12		0
1293	7	2012-02-27 13:45:59	2012-02-29 22:45:33	24		0
1294	3	2012-02-27 13:37:58	2012-04-27 13:37:00	24	2012-02-29 13:50:22	0
1295	1	2012-02-27 13:45:51	2012-04-27 13:45:00	8	2012-02-27 15:50:46	0
1296	2	2012-02-27 13:39:34	2012-04-27 13:39:00	10	2012-02-28 14:47:36	0
1297	1	2012-02-27 13:56:50	2012-04-27 13:56:00	12	2012-02-28 08:58:39	0
1298	1	2012-02-27 13:30:07	2012-03-01 16:29:15	12		0
1299	6	2012-02-27 20:30:09	2012-04-27 20:30:00	24	2012-03-04 11:34:55	0
1300	10	2012-02-28 04:54:52	2012-04-28 04:54:00	1	2012-03-03 10:50:39	0
1301	1	2012-02-28 06:38:11	2012-03-03 11:37:21	8		0
1302	3	2012-02-28 07:48:29	2012-03-04 01:48:00	24	2012-03-01 16:11:45	0
1303	9	2012-02-28 09:30:31	2012-04-28 09:30:00	5	2012-03-01 21:52:44	0
1304	3	2012-02-28 12:47:40	2012-04-28 12:47:00	24	2012-03-01 12:57:59	0
1305	3	2012-02-28 13:45:48	2012-04-28 13:45:00	24	2012-03-01 10:52:44	0
1306	1	2012-02-28 15:13:05	2012-04-28 15:13:00	12	2012-02-29 17:42:46	0
1307	3	2012-02-28 15:21:59	2012-04-28 15:21:00	24	2012-03-01 19:41:13	0
1308	4	2012-02-28 16:58:53	2012-03-01 19:58:28	12		0
1309	5	2012-02-28 16:51:58	2012-04-28 16:51:00	24	2012-03-03 16:34:29	0
1310	1	2012-02-28 17:41:24	2012-04-28 17:41:00	8	2012-02-29 09:46:07	0
1311	2	2012-02-28 19:22:44	2012-03-03 15:22:00	10	2012-02-29 13:00:25	0
1312	2	2012-02-28 19:02:12	2012-04-28 19:02:00	10	2012-03-01 13:33:51	0
1313	1	2012-02-28 19:09:05	2012-03-04 01:08:47	8		0
1314	6	2012-02-28 23:41:11	2012-04-28 23:41:00	24	2012-03-06 21:10:37	0
1315	7	2012-02-29 01:46:30	2012-04-29 01:46:00	24	2012-03-03 10:20:01	0
1316	7	2012-02-29 02:33:22	2012-03-02 12:32:32	24		0
1317	6	2012-02-29 08:40:53	2012-04-29 08:40:00	24	2012-03-04 11:16:38	0
1318	2	2012-02-29 08:01:40	2012-04-29 08:01:00	10	2012-03-01 17:14:34	0
1319	1	2012-02-29 08:21:21	2012-04-29 08:21:00	8	2012-03-01 15:34:41	0
1320	1	2012-02-29 08:33:11	2012-04-29 08:33:00	8	2012-03-01 16:05:03	0
1321	3	2012-02-29 11:29:50	2012-04-29 11:29:00	24	2012-03-03 18:48:53	0
1322	1	2012-02-29 11:04:12	2012-03-03 08:04:00	8	2012-03-01 09:28:37	0
1323	7	2012-02-29 13:19:03	2012-04-29 13:19:00	24	2012-03-27 11:58:07	1
1324	1	2012-02-29 14:13:27	2012-04-29 14:13:00	8	2012-03-01 08:20:34	0
1325	3	2012-02-29 14:16:41	2012-03-03 14:15:55	24		0
1326	4	2012-02-29 14:25:50	2012-04-29 14:25:00	12	2012-03-04 18:50:36	0
1327	2	2012-02-29 14:51:06	2012-04-29 14:51:00	10	2012-03-02 15:29:26	0
1328	3	2012-02-29 15:48:11	2012-04-29 15:48:00	24	2012-03-03 19:13:33	0
1329	1	2012-02-29 16:19:59	2012-04-29 16:20:00	12	2012-03-01 08:21:36	0
1330	1	2012-02-29 20:56:16	2012-04-29 20:56:00	12	2012-03-02 14:23:34	0
1331	4	2012-02-29 21:50:23	2012-04-29 21:50:00	12	2012-03-02 13:11:42	0
1332	10	2012-02-29 22:25:59	2012-03-05 19:25:55	1		4
1333	5	2012-02-29 23:41:12	2012-04-29 23:41:00	24	2012-03-01 15:53:58	0
1334	1	2012-03-01 05:04:52	2012-04-30 05:04:00	8	2012-03-01 23:40:09	0
1335	1	2012-03-01 06:53:04	2012-04-30 06:53:00	12	2012-03-02 17:50:59	0
1336	1	2012-03-01 06:19:57	2012-04-30 06:19:00	8	2012-03-02 17:17:04	0
1337	6	2012-03-01 09:27:48	2012-03-05 01:27:01	24		0
1338	5	2012-03-01 09:53:14	2012-04-30 09:53:00	24	2012-03-03 11:56:31	0
1339	1	2012-03-01 10:36:29	2012-04-30 10:36:00	8	2012-03-02 11:51:13	0
1340	2	2012-03-01 11:26:03	2012-03-03 21:25:05	10		0
1341	1	2012-03-01 12:16:22	2012-04-30 12:16:00	12	2012-03-02 09:43:14	0
1342	1	2012-03-01 12:23:04	2012-04-30 12:23:00	8	2012-03-01 16:10:06	0
1343	1	2012-03-01 13:38:29	2012-03-04 14:38:13	12		0
1344	3	2012-03-01 14:10:52	2012-04-30 14:10:00	24	2012-03-04 18:49:39	0
1345	2	2012-03-01 15:52:59	2012-04-30 15:53:00	10	2012-03-02 11:41:02	0
1346	6	2012-03-01 22:09:32	2012-04-30 22:09:00	24	2012-03-04 18:41:40	0
1347	6	2012-03-01 22:17:23	2012-04-30 22:17:00	24	2012-03-03 20:03:23	0
1348	2	2012-03-01 23:10:16	2012-03-05 18:09:52	10		0
1349	1	2012-03-02 01:02:14	2012-05-01 01:02:00	12	2012-03-03 10:19:04	0
1350	3	2012-03-02 02:27:44	2012-05-01 02:27:00	24	2012-03-04 07:20:51	0
1351	3	2012-03-02 03:29:13	2012-03-04 16:28:44	24		0
1352	5	2012-03-02 07:52:50	2012-05-01 07:52:00	24	2012-03-05 10:56:20	0
1353	1	2012-03-02 07:17:11	2012-05-01 07:17:00	8	2012-03-03 17:17:58	0
1354	1	2012-03-02 07:44:51	2012-05-01 07:44:00	12	2012-03-03 17:13:46	0
1355	7	2012-03-02 08:35:10	2012-05-01 08:35:00	24	2012-03-11 10:27:38	0
1356	4	2012-03-02 08:29:13	2012-05-01 08:29:00	12	2012-03-04 16:42:36	0
1357	6	2012-03-02 09:04:58	2012-05-01 09:04:00	24	2012-03-05 11:35:15	0
1358	4	2012-03-02 10:25:07	2012-05-01 10:25:00	12	2012-03-05 12:56:25	0
1359	1	2012-03-02 11:53:12	2012-05-01 11:53:00	8	2012-03-03 16:54:28	0
1360	5	2012-03-02 11:48:47	2012-03-06 20:48:07	24		0
1361	1	2012-03-02 12:52:50	2012-03-06 12:52:38	8		0
1362	7	2012-03-02 12:02:03	2012-05-01 12:02:00	24	2012-04-24 11:33:05	1
1363	2	2012-03-02 12:32:58	2012-05-01 12:32:00	10	2012-03-03 12:56:19	0
1364	2	2012-03-02 12:47:49	2012-03-05 17:47:00	10	2012-03-03 11:46:23	0
1365	6	2012-03-02 12:00:54	2012-05-01 12:00:00	24	2012-03-09 14:49:23	0
1366	6	2012-03-02 17:04:05	2012-03-05 05:03:17	24		0
1367	1	2012-03-02 18:03:57	2012-03-06 20:03:02	12		0
1368	1	2012-03-02 18:32:02	2012-03-06 02:32:00	12	2012-03-03 14:14:44	0
1369	2	2012-03-02 19:25:56	2012-05-01 19:25:00	10	2012-03-03 08:17:53	0
1370	5	2012-03-02 20:35:16	2012-05-01 20:35:00	24	2012-03-04 11:21:40	0
1371	1	2012-03-03 00:03:29	2012-03-06 14:02:32	8		0
1372	7	2012-03-03 01:30:43	2012-03-07 04:29:54	24		0
1373	3	2012-03-03 03:25:44	2012-05-02 03:25:00	24	2012-03-04 12:08:42	0
1374	2	2012-03-03 06:07:07	2012-05-02 06:07:00	10	2012-03-05 09:45:31	0
1375	7	2012-03-03 08:15:08	2012-05-02 08:15:00	24	2012-03-08 11:55:51	0
1376	5	2012-03-03 09:09:46	2012-05-02 09:09:00	24	2012-03-05 08:44:35	0
1377	9	2012-03-03 09:21:07	2012-05-02 09:21:00	5	2012-03-06 08:05:23	0
1378	1	2012-03-03 11:04:37	2012-03-07 02:04:35	8		0
1379	3	2012-03-03 11:17:55	2012-05-02 11:17:00	24	2012-03-05 10:10:51	0
1380	2	2012-03-03 14:21:08	2012-05-02 14:21:00	10	2012-03-04 09:25:10	0
1381	3	2012-03-03 14:51:25	2012-05-02 14:51:00	24	2012-03-06 18:34:20	0
1382	11	2012-03-03 17:57:27	2012-05-02 17:57:00	1	2012-03-10 09:50:13	4
1383	1	2012-03-03 18:07:44	2012-05-02 18:07:00	8	2012-03-04 14:12:41	0
1384	1	2012-03-03 18:35:57	2012-05-02 18:35:00	12	2012-03-04 10:48:04	0
1385	1	2012-03-03 21:37:17	2012-03-06 20:37:00	8	2012-03-04 11:56:01	0
1386	1	2012-03-03 22:23:10	2012-03-08 04:23:00	12	2012-03-04 17:35:25	0
1387	1	2012-03-04 01:08:50	2012-03-06 05:08:16	8		0
1388	6	2012-03-04 04:02:01	2012-03-09 03:02:00	24	2012-03-05 12:24:48	0
1389	3	2012-03-04 05:34:59	2012-05-03 05:34:00	24	2012-03-06 10:34:08	0
1390	2	2012-03-04 08:45:45	2012-03-07 21:45:00	10	2012-03-05 08:05:28	0
1391	3	2012-03-04 08:06:19	2012-05-03 08:06:00	24	2012-03-06 10:25:21	0
1392	2	2012-03-04 08:07:02	2012-05-03 08:07:00	10	2012-03-05 10:26:54	0
1393	4	2012-03-04 08:15:26	2012-03-07 08:14:42	12		0
1394	2	2012-03-04 08:43:29	2012-05-03 08:43:00	10	2012-03-04 10:32:35	0
1395	6	2012-03-04 09:46:14	2012-05-03 09:46:00	24	2012-03-07 15:12:25	0
1396	5	2012-03-04 09:15:14	2012-05-03 09:15:00	24	2012-03-06 15:46:49	0
1397	9	2012-03-04 09:01:00	2012-05-03 09:01:00	5	2012-03-06 21:50:48	0
1398	1	2012-03-04 09:55:43	2012-05-03 09:55:00	8	2012-03-05 12:47:12	0
1399	9	2012-03-04 09:43:20	2012-03-07 03:43:03	5		0
1400	9	2012-03-04 09:36:00	2012-05-03 09:36:00	5	2012-03-07 11:50:43	0
1401	1	2012-03-04 09:11:14	2012-05-03 09:11:00	8	2012-03-05 11:30:21	0
1402	1	2012-03-04 11:10:25	2012-05-03 11:10:00	12	2012-03-05 10:37:04	0
1403	1	2012-03-04 11:26:47	2012-05-03 11:26:00	8	2012-03-04 16:55:56	0
1404	1	2012-03-04 11:54:44	2012-05-03 11:54:00	8	2012-03-04 15:49:25	0
1405	1	2012-03-04 11:20:44	2012-05-03 11:20:00	12	2012-03-05 11:01:06	0
1406	3	2012-03-04 11:36:21	2012-05-03 11:36:00	24	2012-03-07 12:30:06	0
1407	1	2012-03-04 11:34:16	2012-05-03 11:34:00	12	2012-03-05 13:40:01	0
1408	5	2012-03-04 12:55:25	2012-05-03 12:55:00	24	2012-03-08 09:07:10	0
1409	5	2012-03-04 12:00:02	2012-05-03 12:00:00	24	2012-03-08 11:54:31	0
1410	2	2012-03-04 13:22:11	2012-05-03 13:22:00	10	2012-03-05 11:26:30	0
1411	1	2012-03-04 14:13:35	2012-05-03 14:13:00	8	2012-03-04 19:54:20	0
1412	7	2012-03-04 16:54:41	2012-05-03 16:54:00	24	2012-04-14 06:03:13	1
1413	1	2012-03-04 16:19:54	2012-05-03 16:19:00	8	2012-03-04 22:37:34	0
1414	2	2012-03-04 17:31:12	2012-05-03 17:31:00	10	2012-03-05 17:36:37	0
1415	1	2012-03-04 17:54:45	2012-05-03 17:54:00	8	2012-03-04 18:05:59	0
1416	3	2012-03-04 17:37:54	2012-05-03 17:37:00	24	2012-03-07 13:38:55	0
1417	1	2012-03-04 18:58:03	2012-05-03 18:58:00	8	2012-03-06 02:41:22	0
1418	6	2012-03-04 18:27:54	2012-05-03 18:27:00	24	2012-03-08 15:32:18	0
1419	7	2012-03-04 19:18:01	2012-05-03 19:18:00	24	2012-03-17 09:19:42	0
1420	1	2012-03-04 20:26:29	2012-05-03 20:26:00	12	2012-03-06 10:11:12	0
1421	1	2012-03-04 20:50:25	2012-05-03 20:50:00	8	2012-03-05 10:22:44	0
1422	5	2012-03-04 23:26:37	2012-03-08 05:26:00	24	2012-03-06 20:58:26	0
1423	5	2012-03-04 23:58:19	2012-05-03 23:58:00	24	2012-03-07 13:45:44	0
1424	5	2012-03-04 23:01:06	2012-05-03 23:01:00	24	2012-03-07 08:35:21	0
1425	6	2012-03-05 00:48:59	2012-05-04 00:49:00	24	2012-03-15 12:03:09	0
1426	1	2012-03-05 01:56:49	2012-05-04 01:56:00	8	2012-03-06 08:55:26	0
1427	1	2012-03-05 09:16:15	2012-05-04 09:16:00	8	2012-03-06 15:15:36	0
1428	4	2012-03-05 10:51:18	2012-03-08 02:51:00	12		0
1429	2	2012-03-05 10:17:51	2012-03-08 10:17:11	10		0
1430	4	2012-03-05 11:07:50	2012-05-04 11:07:00	12	2012-03-08 09:52:54	0
1431	10	2012-03-05 11:27:46	2012-05-04 11:27:00	1	2012-03-12 11:01:00	3
1432	5	2012-03-05 11:54:34	2012-05-04 11:54:00	24	2012-03-08 11:50:17	0
1433	3	2012-03-05 12:34:55	2012-03-08 12:34:11	24		0
1434	1	2012-03-05 15:42:16	2012-03-10 05:42:00	12	2012-03-06 11:43:24	0
1435	1	2012-03-05 15:37:35	2012-05-04 15:37:00	12	2012-03-06 07:11:30	0
1436	1	2012-03-05 15:21:13	2012-05-04 15:21:00	8	2012-03-06 09:24:59	0
1437	4	2012-03-05 16:09:00	2012-05-04 16:09:00	12	2012-03-08 08:15:18	0
1438	2	2012-03-05 16:10:16	2012-05-04 16:10:00	10	2012-03-07 13:49:09	0
1439	5	2012-03-05 16:25:26	2012-05-04 16:25:00	24	2012-03-09 11:33:35	0
1440	4	2012-03-05 16:57:25	2012-05-04 16:57:00	12	2012-03-08 08:46:49	0
1441	1	2012-03-05 17:28:04	2012-05-04 17:28:00	8	2012-03-05 21:03:00	0
1442	2	2012-03-05 17:50:36	2012-05-04 17:50:00	10	2012-03-06 10:32:54	0
1443	1	2012-03-05 19:29:10	2012-05-04 19:29:00	12	2012-03-06 09:57:49	0
1444	2	2012-03-05 19:09:11	2012-05-04 19:09:00	10	2012-03-07 07:42:45	0
1445	1	2012-03-05 20:41:10	2012-05-04 20:41:00	12	2012-03-06 11:34:15	0
1446	5	2012-03-06 05:15:29	2012-05-05 05:15:00	24	2012-03-11 11:04:47	0
1447	11	2012-03-06 08:12:41	2012-05-05 08:12:00	1	2012-03-13 11:39:56	2
1448	1	2012-03-06 09:01:36	2012-03-10 00:01:33	8		0
1449	1	2012-03-06 12:46:46	2012-03-08 15:46:36	8		0
1450	3	2012-03-06 12:32:14	2012-05-05 12:32:00	24	2012-03-08 12:54:34	0
1451	3	2012-03-06 15:04:43	2012-05-05 15:04:00	24	2012-03-08 09:11:15	0
1452	3	2012-03-06 15:41:36	2012-05-05 15:41:00	24	2012-03-08 11:21:19	0
1453	4	2012-03-06 15:28:17	2012-03-11 11:28:00	12	2012-03-09 11:22:07	0
1454	4	2012-03-06 15:50:53	2012-05-05 15:50:00	12	2012-03-09 11:44:49	0
1455	4	2012-03-06 16:20:45	2012-03-09 08:20:17	12		0
1456	2	2012-03-06 16:35:00	2012-05-05 16:35:00	10	2012-03-07 07:44:09	0
1457	1	2012-03-06 20:23:52	2012-05-05 20:23:00	8	2012-03-07 11:52:58	0
1458	1	2012-03-06 21:55:36	2012-05-05 21:55:00	8	2012-03-07 06:57:06	0
1459	2	2012-03-06 23:09:52	2012-03-09 20:09:27	10		0
1460	1	2012-03-07 01:36:42	2012-05-06 01:36:00	8	2012-03-08 08:19:50	0
1461	6	2012-03-07 04:15:18	2012-05-06 04:15:00	24	2012-03-09 03:34:29	0
1462	1	2012-03-07 05:10:35	2012-05-06 05:10:00	8	2012-03-08 14:00:00	0
1463	10	2012-03-07 06:09:26	2012-05-06 06:09:00	1	2012-03-14 09:12:27	4
1464	7	2012-03-07 06:51:00	2012-05-06 06:51:00	24	2012-03-12 15:08:43	0
1465	2	2012-03-07 08:51:48	2012-05-06 08:51:00	10	2012-03-07 17:36:40	0
1466	8	2012-03-07 09:56:16	2012-05-06 09:56:00	3	2012-03-10 21:26:41	0
1467	9	2012-03-07 09:29:39	2012-03-10 20:29:28	5		0
1468	9	2012-03-07 09:34:59	2012-05-06 09:34:00	5	2012-03-10 11:40:14	0
1469	6	2012-03-07 09:19:02	2012-05-06 09:19:00	24	2012-03-09 11:12:54	0
1470	6	2012-03-07 09:02:00	2012-05-06 09:02:00	24	2012-03-09 15:49:56	0
1471	1	2012-03-07 11:33:21	2012-05-06 11:33:00	12	2012-03-08 15:47:44	0
1472	11	2012-03-07 11:42:01	2012-05-06 11:42:00	1	2012-03-14 10:02:10	2
1473	5	2012-03-07 12:58:39	2012-05-06 12:58:00	24	2012-03-11 11:43:30	0
1474	2	2012-03-07 12:27:39	2012-05-06 12:27:00	10	2012-03-08 11:06:17	0
1475	3	2012-03-07 12:12:05	2012-05-06 12:12:00	24	2012-03-09 12:35:47	0
1476	4	2012-03-07 12:09:05	2012-05-06 12:09:00	12	2012-03-10 02:13:23	0
1477	8	2012-03-07 14:42:48	2012-03-11 09:42:20	3		2
1478	1	2012-03-07 14:20:29	2012-05-06 14:20:00	8	2012-03-08 09:10:55	0
1479	1	2012-03-07 14:32:23	2012-03-10 08:32:07	8		0
1480	1	2012-03-07 15:50:48	2012-05-06 15:50:00	8	2012-03-08 20:42:25	0
1481	1	2012-03-07 16:26:18	2012-03-11 11:25:50	12		0
1482	2	2012-03-07 16:42:53	2012-05-06 16:42:00	10	2012-03-09 18:00:39	0
1483	7	2012-03-07 18:08:53	2012-05-06 18:08:00	24	2012-03-13 07:17:04	0
1484	3	2012-03-07 18:12:11	2012-05-06 18:12:00	24	2012-03-09 12:18:48	0
1485	3	2012-03-07 21:29:57	2012-03-10 00:29:32	24		0
1486	1	2012-03-07 22:32:37	2012-05-06 22:32:00	8	2012-03-08 06:31:57	0
1487	1	2012-03-07 23:32:37	2012-05-06 23:32:00	8	2012-03-08 08:39:34	0
1488	1	2012-03-08 01:43:11	2012-05-07 01:43:00	12	2012-03-09 09:14:22	0
1489	5	2012-03-08 05:19:15	2012-05-07 05:19:00	24	2012-03-11 15:40:30	0
1490	9	2012-03-08 09:33:47	2012-05-07 09:33:00	5	2012-03-11 07:39:26	0
1491	1	2012-03-08 09:15:46	2012-05-07 09:15:00	8	2012-03-09 10:25:43	0
1492	4	2012-03-08 14:19:17	2012-05-07 14:19:00	12	2012-03-11 07:16:53	0
1493	1	2012-03-08 15:56:14	2012-05-07 15:56:00	12	2012-03-09 09:45:20	0
1494	1	2012-03-08 16:11:56	2012-05-07 16:11:00	8	2012-03-09 06:56:33	0
1495	6	2012-03-08 17:00:45	2012-05-07 17:00:00	24	2012-03-15 09:06:38	0
1496	1	2012-03-08 17:26:34	2012-03-10 19:26:00	12	2012-03-09 10:29:35	0
1497	1	2012-03-08 17:13:30	2012-03-13 02:12:50	12		0
1498	4	2012-03-08 18:15:29	2012-05-07 18:15:00	12	2012-03-10 11:43:15	0
1499	1	2012-03-08 18:18:52	2012-05-07 18:18:00	8	2012-03-09 11:25:11	0
1500	2	2012-03-08 19:19:46	2012-05-07 19:19:00	10	2012-03-10 13:54:09	0
1501	1	2012-03-08 20:21:07	2012-03-11 12:21:04	8		0
1502	2	2012-03-08 21:25:25	2012-05-07 21:25:00	10	2012-03-09 18:42:02	0
1503	10	2012-03-08 22:28:54	2012-05-07 22:28:00	1	2012-03-12 14:14:04	4
1504	2	2012-03-08 23:08:16	2012-05-07 23:08:00	10	2012-03-09 08:41:30	0
1505	1	2012-03-09 00:42:17	2012-05-08 00:42:00	8	2012-03-10 11:14:37	0
1506	1	2012-03-09 01:05:39	2012-05-08 01:05:00	12	2012-03-10 15:53:23	0
1507	11	2012-03-09 04:38:22	2012-05-08 04:38:00	1	2012-03-16 10:50:32	3
1508	1	2012-03-09 07:38:17	2012-05-08 07:38:00	8	2012-03-09 09:24:31	0
1509	2	2012-03-09 08:40:36	2012-05-08 08:40:00	10	2012-03-10 17:02:33	0
1510	6	2012-03-09 09:15:47	2012-05-08 09:15:00	24	2012-03-12 07:16:07	0
1511	5	2012-03-09 10:47:46	2012-05-08 10:47:00	24	2012-03-13 11:21:38	0
1512	3	2012-03-09 10:30:05	2012-05-08 10:30:00	24	2012-03-11 07:48:21	0
1513	1	2012-03-09 12:09:56	2012-05-08 12:09:00	8	2012-03-10 03:16:51	0
1514	4	2012-03-09 14:01:00	2012-05-08 14:01:00	12	2012-03-12 09:26:23	0
1515	3	2012-03-09 14:48:40	2012-05-08 14:48:00	24	2012-03-12 15:19:38	0
1516	2	2012-03-09 14:15:45	2012-03-13 22:14:57	10		0
1517	5	2012-03-09 16:47:06	2012-05-08 16:47:00	24	2012-03-13 16:28:51	0
1518	8	2012-03-09 18:04:52	2012-03-13 05:04:43	3		0
1519	4	2012-03-09 21:56:55	2012-05-08 21:56:00	12	2012-03-11 14:46:17	0
1520	2	2012-03-09 21:57:33	2012-05-08 21:57:00	10	2012-03-10 06:42:41	0
1521	10	2012-03-09 21:32:23	2012-05-08 21:32:00	1	2012-03-16 09:28:28	2
1522	11	2012-03-09 22:26:44	2012-05-08 22:26:00	1	2012-03-17 09:02:44	2
1523	5	2012-03-09 22:40:49	2012-05-08 22:40:00	24	2012-03-11 10:26:49	0
1524	6	2012-03-10 03:24:37	2012-05-09 03:24:00	24	2012-04-02 04:13:46	0
1525	3	2012-03-10 07:32:40	2012-05-09 07:32:00	24	2012-03-12 21:29:51	0
1526	4	2012-03-10 08:33:49	2012-05-09 08:33:00	12	2012-03-12 16:39:20	0
1527	3	2012-03-10 08:47:07	2012-03-13 23:46:58	24		0
1528	3	2012-03-10 08:07:23	2012-05-09 08:07:00	24	2012-03-12 16:13:28	0
1529	5	2012-03-10 14:18:20	2012-05-09 14:18:00	24	2012-03-15 18:20:01	0
1530	5	2012-03-10 14:23:12	2012-05-09 14:23:00	24	2012-03-14 10:30:14	0
1531	3	2012-03-10 14:16:50	2012-05-09 14:16:00	24	2012-03-13 08:15:03	0
1532	4	2012-03-10 15:32:41	2012-05-09 15:32:00	12	2012-03-13 12:45:34	0
1533	5	2012-03-10 17:29:35	2012-03-13 15:28:41	24		0
1534	2	2012-03-10 17:09:44	2012-05-09 17:09:00	10	2012-03-11 10:10:14	0
1535	1	2012-03-10 17:25:05	2012-05-09 17:25:00	12	2012-03-11 18:10:32	0
1536	11	2012-03-10 21:32:04	2012-05-09 21:32:00	1	2012-03-17 10:20:05	3
1537	6	2012-03-10 22:45:54	2012-05-09 22:45:00	24	2012-03-13 10:34:17	0
1538	10	2012-03-10 22:06:10	2012-05-09 22:06:00	1	2012-03-17 18:55:25	3
1539	5	2012-03-10 23:51:48	2012-05-09 23:51:00	24	2012-03-12 15:46:13	0
1540	1	2012-03-10 23:19:32	2012-05-09 23:19:00	8	2012-03-11 08:43:58	0
1541	2	2012-03-10 23:22:08	2012-05-09 23:22:00	10	2012-03-11 20:36:07	0
1542	3	2012-03-11 03:12:05	2012-03-15 06:11:43	24		0
1543	3	2012-03-11 03:13:44	2012-05-10 03:13:00	24	2012-03-13 09:56:47	0
1544	5	2012-03-11 03:22:34	2012-05-10 03:22:00	24	2012-03-14 04:23:58	0
1545	1	2012-03-11 06:01:23	2012-05-10 06:01:00	8	2012-03-11 14:11:09	0
1546	1	2012-03-11 06:28:40	2012-05-10 06:28:00	12	2012-03-12 09:20:13	0
1547	4	2012-03-11 08:05:23	2012-05-10 08:05:00	12	2012-03-13 10:46:05	0
1548	9	2012-03-11 09:19:52	2012-05-10 09:19:00	5	2012-03-14 02:41:36	1
1549	5	2012-03-11 09:25:18	2012-05-10 09:25:00	24	2012-03-13 14:48:11	0
1550	3	2012-03-11 09:02:09	2012-05-10 09:02:00	24	2012-03-12 11:10:15	0
1551	4	2012-03-11 09:40:09	2012-05-10 09:40:00	12	2012-03-12 15:01:08	0
1552	9	2012-03-11 09:47:23	2012-05-10 09:47:00	5	2012-03-14 13:40:50	1
1553	7	2012-03-11 12:21:33	2012-05-10 12:21:00	24	2012-04-21 02:05:43	1
1554	5	2012-03-11 13:07:46	2012-05-10 13:07:00	24	2012-03-15 10:32:50	0
1555	1	2012-03-11 15:19:11	2012-05-10 15:19:00	8	2012-03-12 09:35:18	0
1556	7	2012-03-11 19:32:59	2012-03-14 07:32:22	24		0
1557	6	2012-03-11 22:15:03	2012-05-10 22:15:00	24	2012-03-14 14:42:14	0
1558	1	2012-03-11 23:24:20	2012-03-15 15:23:34	8		0
1559	1	2012-03-12 01:01:43	2012-05-11 01:01:00	12	2012-03-13 12:35:20	0
1560	3	2012-03-12 02:54:00	2012-05-11 02:54:00	24	2012-03-13 18:01:00	0
1561	3	2012-03-12 08:43:52	2012-05-11 08:43:00	24	2012-03-14 08:42:41	0
1562	3	2012-03-12 08:18:50	2012-05-11 08:18:00	24	2012-03-14 13:27:09	0
1563	5	2012-03-12 09:52:26	2012-03-14 17:52:00	24	2012-03-14 12:05:02	0
1564	1	2012-03-12 09:31:33	2012-05-11 09:31:00	8	2012-03-13 11:07:36	0
1565	6	2012-03-12 09:08:53	2012-05-11 09:08:00	24	2012-03-15 15:12:05	0
1566	9	2012-03-12 09:31:11	2012-03-14 23:31:00	5		0
1567	8	2012-03-12 09:34:31	2012-05-11 09:34:00	3	2012-03-16 13:13:43	1
1568	3	2012-03-12 10:28:38	2012-05-11 10:28:00	24	2012-03-14 12:18:51	0
1569	2	2012-03-12 10:28:05	2012-05-11 10:28:00	10	2012-03-13 10:45:36	0
1570	3	2012-03-12 10:32:09	2012-03-15 05:31:33	24		0
1571	1	2012-03-12 11:14:07	2012-05-11 11:14:00	12	2012-03-13 09:42:14	0
1572	1	2012-03-12 12:02:34	2012-05-11 12:02:00	12	2012-03-13 09:03:50	0
1573	4	2012-03-12 13:12:51	2012-05-11 13:12:00	12	2012-03-14 09:05:23	0
1574	1	2012-03-12 13:17:47	2012-05-11 13:17:00	8	2012-03-12 17:42:36	0
1575	1	2012-03-12 13:42:49	2012-05-11 13:42:00	8	2012-03-13 09:50:40	0
1576	7	2012-03-12 13:53:04	2012-05-11 13:53:00	24	2012-04-22 16:13:17	0
1577	5	2012-03-12 14:19:50	2012-05-11 14:19:00	24	2012-03-16 16:14:28	0
1578	1	2012-03-12 16:14:22	2012-03-16 01:13:43	8		0
1579	1	2012-03-12 16:55:01	2012-05-11 16:55:00	8	2012-03-13 15:50:42	0
1580	1	2012-03-12 18:32:42	2012-05-11 18:32:00	12	2012-03-13 21:07:37	0
1581	2	2012-03-12 19:50:46	2012-05-11 19:50:00	10	2012-03-13 18:32:17	0
1582	2	2012-03-12 19:23:07	2012-05-11 19:23:00	10	2012-03-14 11:23:11	0
1583	1	2012-03-12 20:32:11	2012-05-11 20:32:00	8	2012-03-13 13:48:10	0
1584	5	2012-03-12 20:06:25	2012-05-11 20:06:00	24	2012-03-15 11:10:52	0
1585	1	2012-03-12 20:35:24	2012-05-11 20:35:00	12	2012-03-15 06:56:48	0
1586	4	2012-03-12 21:06:43	2012-05-11 21:06:00	12	2012-03-14 21:45:52	0
1587	4	2012-03-12 21:11:17	2012-03-15 06:10:24	12		0
1588	5	2012-03-12 23:43:22	2012-05-11 23:43:00	24	2012-03-14 16:23:34	0
1589	11	2012-03-13 04:43:20	2012-03-15 05:43:00	1		1
1590	7	2012-03-13 06:29:38	2012-03-15 08:29:00	24		0
1591	11	2012-03-13 08:15:11	2012-03-16 09:14:55	1		0
1592	3	2012-03-13 09:26:42	2012-05-12 09:26:00	24	2012-03-14 05:29:39	0
1593	3	2012-03-13 10:04:47	2012-05-12 10:04:00	24	2012-03-15 10:08:28	0
1594	7	2012-03-13 10:16:05	2012-03-17 01:15:43	24		0
1595	1	2012-03-13 11:28:54	2012-05-12 11:28:00	8	2012-03-14 10:46:17	0
1596	4	2012-03-13 11:22:38	2012-05-12 11:22:00	12	2012-03-16 15:08:05	0
1597	7	2012-03-13 12:32:24	2012-03-16 01:31:55	24		0
1598	2	2012-03-13 12:13:24	2012-03-17 04:12:32	10		0
1599	4	2012-03-13 14:20:25	2012-05-12 14:20:00	12	2012-03-17 07:04:41	0
1600	3	2012-03-13 14:04:50	2012-05-12 14:04:00	24	2012-03-16 07:37:52	0
1601	5	2012-03-13 14:29:23	2012-05-12 14:29:00	24	2012-03-17 09:51:28	0
1602	1	2012-03-13 14:58:49	2012-03-17 01:58:12	12		0
1603	4	2012-03-13 14:19:15	2012-03-15 19:19:00	12		0
1604	1	2012-03-13 15:09:32	2012-05-12 15:09:00	12	2012-03-14 09:03:26	0
1605	1	2012-03-13 16:10:38	2012-05-12 16:10:00	8	2012-03-13 20:44:50	0
1606	5	2012-03-13 17:48:39	2012-05-12 17:48:00	24	2012-03-17 16:45:26	0
1607	5	2012-03-13 17:08:40	2012-05-12 17:08:00	24	2012-03-17 09:35:55	0
1608	10	2012-03-13 17:14:50	2012-05-12 17:14:00	1	2012-03-20 09:53:30	3
1609	2	2012-03-13 19:32:47	2012-05-12 19:32:00	10	2012-03-15 18:15:45	0
1610	7	2012-03-13 21:37:14	2012-05-12 21:37:00	24	2012-03-23 14:36:38	0
1611	6	2012-03-14 04:48:06	2012-03-16 17:47:16	24		0
1612	7	2012-03-14 09:50:09	2012-05-13 09:50:00	24	2012-03-17 12:30:30	0
1613	5	2012-03-14 09:46:13	2012-05-13 09:46:00	24	2012-03-16 05:19:08	0
1614	8	2012-03-14 09:11:51	2012-03-17 09:11:36	3		1
1615	4	2012-03-14 10:49:28	2012-05-13 10:49:00	12	2012-03-17 10:19:16	0
1616	4	2012-03-14 12:31:53	2012-03-17 10:30:59	12		0
1617	1	2012-03-14 12:42:24	2012-05-13 12:42:00	8	2012-03-15 14:31:36	0
1618	3	2012-03-14 12:00:32	2012-03-17 08:59:36	24		0
1619	1	2012-03-14 12:51:54	2012-03-16 13:51:45	8		0
1620	1	2012-03-14 13:25:55	2012-05-13 13:25:00	8	2012-03-14 14:49:18	0
1621	1	2012-03-14 16:50:41	2012-03-18 22:50:00	8	2012-03-15 08:28:24	0
1622	1	2012-03-14 16:21:57	2012-05-13 16:21:00	8	2012-03-15 12:56:42	0
1623	2	2012-03-14 17:55:17	2012-05-13 17:55:00	10	2012-03-16 17:47:11	0
1624	3	2012-03-14 17:37:10	2012-05-13 17:37:00	24	2012-03-17 06:04:05	0
1625	4	2012-03-14 18:03:36	2012-05-13 18:03:00	12	2012-03-16 10:23:52	0
1626	8	2012-03-14 18:12:35	2012-05-13 18:12:00	3	2012-03-19 13:15:14	1
1627	5	2012-03-14 20:39:27	2012-03-17 16:39:00	24		0
1628	6	2012-03-14 21:30:13	2012-05-13 21:30:00	24	2012-03-18 15:49:29	0
1629	7	2012-03-15 01:09:39	2012-05-14 01:09:00	24	2012-03-17 15:46:13	0
1630	3	2012-03-15 08:58:54	2012-05-14 08:58:00	24	2012-03-17 17:15:26	0
1631	6	2012-03-15 08:47:41	2012-05-14 08:47:00	24	2012-03-19 16:21:02	0
1632	9	2012-03-15 09:08:41	2012-05-14 09:08:00	5	2012-03-18 11:04:18	0
1633	7	2012-03-15 09:02:46	2012-03-17 23:02:01	24		0
1634	4	2012-03-15 12:31:47	2012-05-14 12:31:00	12	2012-03-17 16:17:22	0
1635	1	2012-03-15 13:13:50	2012-05-14 13:13:00	8	2012-03-16 11:40:10	0
1636	1	2012-03-15 13:38:38	2012-03-17 20:38:14	8		0
1637	5	2012-03-15 15:11:21	2012-03-18 02:10:43	24		0
1638	1	2012-03-15 16:04:26	2012-05-14 16:04:00	8	2012-03-16 21:07:24	0
1639	2	2012-03-15 17:38:51	2012-05-14 17:38:00	10	2012-03-16 22:49:25	0
1640	6	2012-03-15 18:20:32	2012-05-14 18:20:00	24	2012-03-20 11:50:15	0
1641	2	2012-03-15 18:21:34	2012-05-14 18:21:00	10	2012-03-17 02:43:52	0
1642	1	2012-03-16 00:04:35	2012-05-15 00:04:00	12	2012-03-17 00:05:48	0
1643	7	2012-03-16 01:10:23	2012-03-19 17:09:31	24		0
1644	1	2012-03-16 08:44:31	2012-05-15 08:44:00	8	2012-03-16 13:43:42	0
1645	3	2012-03-16 08:35:15	2012-03-20 03:34:31	24		0
1646	2	2012-03-16 09:32:57	2012-03-19 05:32:20	10		0
1647	7	2012-03-16 10:13:06	2012-05-15 10:13:00	24	2012-03-29 11:51:22	0
1648	1	2012-03-16 10:10:11	2012-05-15 10:10:00	8	2012-03-17 16:56:11	0
1649	2	2012-03-16 11:31:58	2012-03-21 10:31:00	10	2012-03-17 16:31:12	0
1650	1	2012-03-16 13:39:07	2012-03-19 09:38:31	12		0
1651	4	2012-03-16 13:28:48	2012-05-15 13:28:00	12	2012-03-18 12:56:09	0
1652	2	2012-03-16 13:37:20	2012-05-15 13:37:00	10	2012-03-17 15:32:07	0
1653	1	2012-03-16 14:31:20	2012-05-15 14:31:00	8	2012-03-17 10:11:19	0
1654	6	2012-03-16 16:41:25	2012-05-15 16:41:00	24	2012-03-29 09:29:48	0
1655	10	2012-03-16 17:03:26	2012-05-15 17:03:00	1	2012-03-23 22:44:14	2
1656	1	2012-03-16 17:27:40	2012-03-18 18:27:08	8		0
1657	1	2012-03-16 17:04:31	2012-05-15 17:04:00	12	2012-03-17 14:42:48	0
1658	1	2012-03-16 18:18:14	2012-03-19 15:17:18	8		0
1659	1	2012-03-16 20:46:36	2012-05-15 20:46:00	8	2012-03-17 13:26:15	0
1660	6	2012-03-16 20:26:25	2012-05-15 20:26:00	24	2012-03-21 10:50:47	0
1661	4	2012-03-16 21:40:00	2012-05-15 21:40:00	12	2012-03-18 13:52:19	0
1662	6	2012-03-16 22:37:27	2012-05-15 22:37:00	24	2012-03-19 14:04:58	0
1663	6	2012-03-16 22:53:56	2012-05-15 22:53:00	24	2012-03-19 12:36:28	0
1664	6	2012-03-16 23:18:44	2012-05-15 23:18:00	24	2012-03-22 20:52:12	0
1665	7	2012-03-17 01:14:20	2012-05-16 01:14:00	24	2012-03-23 14:28:07	0
1666	1	2012-03-17 03:26:24	2012-05-16 03:26:00	8	2012-03-18 02:13:53	0
1667	1	2012-03-17 03:53:57	2012-05-16 03:53:00	8	2012-03-18 08:28:49	0
1668	1	2012-03-17 07:26:10	2012-05-16 07:26:00	8	2012-03-18 17:56:36	0
1669	2	2012-03-17 08:26:03	2012-05-16 08:26:00	10	2012-03-18 11:51:22	0
1670	2	2012-03-17 08:55:44	2012-05-16 08:55:00	10	2012-03-18 10:24:56	0
1671	9	2012-03-17 09:29:04	2012-03-20 04:28:29	5		0
1672	8	2012-03-17 09:19:29	2012-05-16 09:19:00	3	2012-03-20 18:22:41	0
1673	1	2012-03-17 09:34:33	2012-05-16 09:34:00	8	2012-03-18 19:37:42	0
1674	6	2012-03-17 10:29:08	2012-05-16 10:29:00	24	2012-03-23 14:46:39	0
1675	1	2012-03-17 10:06:13	2012-05-16 10:06:00	8	2012-03-18 09:22:13	0
1676	3	2012-03-17 10:15:26	2012-05-16 10:15:00	24	2012-03-19 16:48:31	0
1677	1	2012-03-17 13:58:56	2012-03-21 21:58:08	8		0
1678	2	2012-03-17 14:57:29	2012-05-16 14:57:00	10	2012-03-18 07:05:43	0
1679	7	2012-03-17 14:49:06	2012-05-16 14:49:00	24	2012-04-02 09:48:48	0
1680	10	2012-03-17 15:42:42	2012-03-21 02:41:46	1		3
1681	3	2012-03-17 16:28:15	2012-05-16 16:28:00	24	2012-03-20 11:31:21	0
1682	2	2012-03-17 17:35:19	2012-05-16 17:35:00	10	2012-03-19 10:14:56	0
1683	1	2012-03-17 17:31:56	2012-05-16 17:31:00	12	2012-03-18 10:37:21	0
1684	8	2012-03-17 18:45:33	2012-05-16 18:45:00	3	2012-03-24 08:27:43	1
1685	1	2012-03-17 18:46:37	2012-05-16 18:46:00	12	2012-03-18 13:22:38	0
1686	1	2012-03-17 18:45:45	2012-03-19 20:45:40	12		0
1687	7	2012-03-17 19:41:41	2012-05-16 19:41:00	24	2012-04-13 14:42:57	0
1688	1	2012-03-17 20:46:10	2012-05-16 20:46:00	8	2012-03-18 13:31:47	0
1689	6	2012-03-17 22:05:35	2012-05-16 22:05:00	24	2012-03-19 14:18:05	0
1690	6	2012-03-18 00:39:48	2012-03-20 11:39:10	24		0
1691	1	2012-03-18 00:17:53	2012-03-20 01:17:45	8		0
1692	1	2012-03-18 06:32:47	2012-05-17 06:32:00	8	2012-03-18 13:15:43	0
1693	5	2012-03-18 09:20:51	2012-05-17 09:20:00	24	2012-03-20 09:51:19	0
1694	6	2012-03-18 09:17:36	2012-05-17 09:17:00	24	2012-03-21 13:03:28	0
1695	1	2012-03-18 11:40:05	2012-03-20 22:40:00	8	2012-03-19 04:54:49	0
1696	3	2012-03-18 11:34:42	2012-05-17 11:34:00	24	2012-03-20 04:30:45	0
1697	1	2012-03-18 12:18:26	2012-05-17 12:18:00	8	2012-03-19 21:13:14	0
1698	1	2012-03-18 12:39:35	2012-03-21 20:39:27	8		0
1699	1	2012-03-18 12:38:24	2012-03-21 05:38:06	8		0
1700	4	2012-03-18 12:14:02	2012-03-20 21:13:08	12		0
1701	1	2012-03-18 12:10:59	2012-05-17 12:10:00	8	2012-03-19 09:14:28	0
1702	1	2012-03-18 13:21:37	2012-05-17 13:21:00	12	2012-03-19 10:27:31	0
1703	6	2012-03-18 13:14:22	2012-03-21 00:13:58	24		0
1704	4	2012-03-18 15:33:04	2012-05-17 15:33:00	12	2012-03-21 12:45:17	0
1705	1	2012-03-18 16:36:03	2012-05-17 16:36:00	8	2012-03-18 18:24:28	0
1706	3	2012-03-18 17:46:33	2012-05-17 17:46:00	24	2012-03-21 09:12:08	0
1707	7	2012-03-18 17:53:59	2012-05-17 17:54:00	24	2012-03-28 13:03:12	0
1708	1	2012-03-18 18:38:01	2012-05-17 18:38:00	12	2012-03-19 12:15:54	0
1709	1	2012-03-18 18:51:10	2012-03-21 18:50:30	8		0
1710	5	2012-03-18 18:06:21	2012-05-17 18:06:00	24	2012-03-21 12:02:44	0
1711	1	2012-03-18 19:45:22	2012-05-17 19:45:00	8	2012-03-19 03:23:55	0
1712	1	2012-03-18 19:23:01	2012-05-17 19:23:00	12	2012-03-19 11:51:06	0
1713	4	2012-03-18 19:05:40	2012-05-17 19:05:00	12	2012-03-22 00:19:40	0
1714	6	2012-03-18 20:21:13	2012-03-21 16:21:00	24		0
1715	6	2012-03-18 21:09:03	2012-05-17 21:09:00	24	2012-03-26 08:34:15	0
1716	3	2012-03-18 21:19:28	2012-03-21 11:19:13	24		0
1717	6	2012-03-18 22:25:34	2012-05-17 22:25:00	24	2012-03-20 14:34:18	0
1718	9	2012-03-19 09:35:13	2012-03-23 01:35:00	5	2012-03-22 16:46:59	0
1719	5	2012-03-19 09:01:38	2012-05-18 09:01:00	24	2012-03-21 07:54:06	0
1720	5	2012-03-19 09:27:24	2012-05-18 09:27:00	24	2012-03-20 13:19:20	0
1721	9	2012-03-19 09:08:43	2012-03-21 12:08:33	5		0
1722	1	2012-03-19 11:54:20	2012-05-18 11:54:00	12	2012-03-20 10:53:13	0
1723	3	2012-03-19 11:09:05	2012-05-18 11:09:00	24	2012-03-21 15:25:37	0
1724	6	2012-03-19 11:30:05	2012-05-18 11:30:00	24	2012-03-26 13:02:37	0
1725	7	2012-03-19 12:56:36	2012-05-18 12:56:00	24	2012-04-08 15:52:41	0
1726	7	2012-03-19 12:18:28	2012-03-21 17:18:01	24		0
1727	4	2012-03-19 18:35:49	2012-05-18 18:35:00	12	2012-03-21 15:52:38	0
1728	7	2012-03-19 19:43:26	2012-03-22 19:42:40	24		0
1729	1	2012-03-19 20:33:06	2012-05-18 20:33:00	8	2012-03-20 08:15:33	0
1730	1	2012-03-20 00:25:52	2012-05-19 00:25:00	8	2012-03-21 10:17:34	0
1731	1	2012-03-20 01:09:26	2012-03-22 09:08:52	12		0
1732	3	2012-03-20 10:13:27	2012-05-19 10:13:00	24	2012-03-22 16:02:40	0
1733	8	2012-03-20 11:55:36	2012-03-24 19:54:48	3		2
1734	4	2012-03-20 12:11:51	2012-05-19 12:11:00	12	2012-03-22 16:07:53	0
1735	7	2012-03-20 13:49:34	2012-05-19 13:49:00	24	2012-04-02 10:11:08	0
1736	2	2012-03-20 13:32:29	2012-05-19 13:32:00	10	2012-03-21 12:33:23	0
1737	2	2012-03-20 13:22:25	2012-05-19 13:22:00	10	2012-03-21 10:03:47	0
1738	2	2012-03-20 13:51:22	2012-05-19 13:51:00	10	2012-03-21 14:48:35	0
1739	4	2012-03-20 13:47:04	2012-03-23 06:46:38	12		0
1740	3	2012-03-20 14:11:00	2012-05-19 14:11:00	24	2012-03-23 15:48:57	0
1741	3	2012-03-20 17:02:17	2012-05-19 17:02:00	24	2012-03-23 09:22:26	0
1742	2	2012-03-20 17:54:04	2012-05-19 17:54:00	10	2012-03-22 10:44:54	0
1743	11	2012-03-20 17:48:40	2012-05-19 17:48:00	1	2012-03-27 06:49:32	1
1744	5	2012-03-20 17:55:51	2012-05-19 17:55:00	24	2012-03-23 07:32:21	0
1745	2	2012-03-20 17:23:05	2012-05-19 17:23:00	10	2012-03-21 07:10:31	0
1746	8	2012-03-20 18:40:43	2012-05-19 18:40:00	3	2012-03-25 10:00:32	0
1747	1	2012-03-20 19:36:14	2012-05-19 19:36:00	8	2012-03-21 03:54:25	0
1748	5	2012-03-20 20:56:48	2012-05-19 20:56:00	24	2012-03-23 13:48:24	0
1749	1	2012-03-20 20:39:27	2012-05-19 20:39:00	8	2012-03-21 14:08:16	0
1750	4	2012-03-20 21:12:26	2012-05-19 21:12:00	12	2012-03-22 18:51:48	0
1751	1	2012-03-20 21:27:58	2012-05-19 21:27:00	8	2012-03-21 08:27:08	0
1752	1	2012-03-20 21:55:04	2012-05-19 21:55:00	8	2012-03-21 23:08:26	0
1753	1	2012-03-21 06:12:05	2012-03-23 20:11:21	8		0
1754	2	2012-03-21 06:14:59	2012-05-20 06:15:00	10	2012-03-22 15:51:49	0
1755	5	2012-03-21 07:34:16	2012-03-24 08:34:00	24		0
1756	5	2012-03-21 08:56:37	2012-05-20 08:56:00	24	2012-03-24 11:16:30	0
1757	7	2012-03-21 08:38:48	2012-05-20 08:38:00	24	2012-03-28 17:11:16	0
1758	3	2012-03-21 08:33:47	2012-05-20 08:33:00	24	2012-03-23 17:55:24	0
1759	1	2012-03-21 09:06:42	2012-03-24 02:06:00	8	2012-03-21 19:43:47	0
1760	1	2012-03-21 09:01:36	2012-05-20 09:01:00	8	2012-03-21 11:14:02	0
1761	1	2012-03-21 10:50:36	2012-05-20 10:50:00	12	2012-03-22 12:26:49	0
1762	4	2012-03-21 11:34:24	2012-05-20 11:34:00	12	2012-03-24 12:54:08	0
1763	2	2012-03-21 12:40:10	2012-05-20 12:40:00	10	2012-03-22 09:38:52	0
1764	1	2012-03-21 15:36:48	2012-05-20 15:36:00	8	2012-03-22 04:40:50	0
1765	5	2012-03-21 16:32:01	2012-05-20 16:32:00	24	2012-03-26 18:23:55	0
1766	4	2012-03-21 18:19:35	2012-05-20 18:19:00	12	2012-03-23 07:11:36	0
1767	2	2012-03-21 21:09:17	2012-05-20 21:09:00	10	2012-03-22 15:18:55	0
1768	3	2012-03-21 21:04:32	2012-05-20 21:04:00	24	2012-03-23 21:24:25	0
1769	10	2012-03-21 22:53:26	2012-03-25 04:53:00	1		1
1770	10	2012-03-21 22:17:28	2012-05-20 22:17:00	1	2012-03-25 11:39:31	0
1771	10	2012-03-21 22:24:13	2012-05-20 22:24:00	1	2012-03-28 17:04:25	2
1772	1	2012-03-22 05:25:58	2012-05-21 05:25:00	8	2012-03-22 09:17:26	0
1773	3	2012-03-22 08:28:18	2012-05-21 08:28:00	24	2012-03-24 08:36:44	0
1774	3	2012-03-22 08:01:42	2012-05-21 08:01:00	24	2012-03-24 11:21:32	0
1775	3	2012-03-22 10:00:09	2012-05-21 10:00:00	24	2012-03-24 10:50:23	0
1776	1	2012-03-22 10:14:26	2012-05-21 10:14:00	8	2012-03-22 16:48:24	0
1777	1	2012-03-22 11:34:53	2012-05-21 11:34:00	8	2012-03-23 17:41:33	0
1778	5	2012-03-22 11:05:59	2012-05-21 11:05:00	24	2012-03-26 06:53:49	0
1779	5	2012-03-22 12:49:18	2012-05-21 12:49:00	24	2012-03-26 11:18:21	0
1780	1	2012-03-22 13:26:21	2012-05-21 13:26:00	8	2012-03-23 10:32:39	0
1781	4	2012-03-22 13:43:26	2012-05-21 13:43:00	12	2012-03-24 11:21:39	0
1782	4	2012-03-22 13:02:27	2012-05-21 13:02:00	12	2012-03-25 10:09:52	0
1783	3	2012-03-22 14:20:27	2012-03-25 14:19:43	24		0
1784	1	2012-03-22 14:58:30	2012-05-21 14:58:00	12	2012-03-23 19:57:29	0
1785	4	2012-03-22 15:06:44	2012-05-21 15:06:00	12	2012-03-26 00:20:00	0
1786	2	2012-03-22 16:25:46	2012-05-21 16:25:00	10	2012-03-24 06:29:00	0
1787	1	2012-03-22 19:07:10	2012-03-27 01:06:52	8		0
1788	1	2012-03-22 20:45:56	2012-03-26 21:45:00	8	2012-03-23 11:55:23	0
1789	6	2012-03-23 09:02:45	2012-05-22 09:02:00	24	2012-03-26 08:01:36	0
1790	8	2012-03-23 09:25:38	2012-05-22 09:25:00	3	2012-03-27 15:38:05	1
1791	1	2012-03-23 09:35:50	2012-05-22 09:35:00	8	2012-03-23 13:56:13	0
1792	4	2012-03-23 10:14:28	2012-05-22 10:14:00	12	2012-03-26 12:55:21	0
1793	4	2012-03-23 10:19:56	2012-05-22 10:19:00	12	2012-03-26 12:02:36	0
1794	2	2012-03-23 12:54:11	2012-05-22 12:54:00	10	2012-03-24 12:13:56	0
1795	5	2012-03-23 12:43:21	2012-05-22 12:43:00	24	2012-03-27 15:23:10	0
1796	1	2012-03-23 12:25:38	2012-05-22 12:25:00	8	2012-03-24 15:21:28	0
1797	1	2012-03-23 12:13:34	2012-03-26 23:12:39	8		0
1798	1	2012-03-23 12:33:57	2012-05-22 12:33:00	8	2012-03-24 09:14:58	0
1799	1	2012-03-23 16:48:11	2012-05-22 16:48:00	8	2012-03-24 08:32:33	0
1800	1	2012-03-23 19:35:55	2012-03-25 21:34:57	12		0
1801	5	2012-03-23 20:46:08	2012-03-28 02:46:00	24	2012-03-26 11:00:39	0
1802	5	2012-03-23 20:17:08	2012-05-22 20:17:00	24	2012-03-26 23:49:57	0
1803	5	2012-03-23 20:40:13	2012-05-22 20:40:00	24	2012-03-25 14:42:10	0
1804	3	2012-03-24 03:41:51	2012-05-23 03:41:00	24	2012-03-24 17:02:10	0
1805	1	2012-03-24 04:34:39	2012-05-23 04:34:00	8	2012-03-25 10:27:03	0
1806	3	2012-03-24 05:19:09	2012-05-23 05:19:00	24	2012-03-26 23:53:53	0
1807	5	2012-03-24 08:29:00	2012-05-23 08:29:00	24	2012-03-27 11:39:10	0
1808	3	2012-03-24 08:54:28	2012-05-23 08:54:00	24	2012-03-26 09:37:15	0
1809	4	2012-03-24 10:02:50	2012-03-26 13:02:40	12		0
1810	2	2012-03-24 10:20:40	2012-05-23 10:20:00	10	2012-03-25 16:24:40	0
1811	4	2012-03-24 13:19:34	2012-05-23 13:19:00	12	2012-03-28 00:28:33	0
1812	2	2012-03-24 15:56:33	2012-05-23 15:56:00	10	2012-03-25 14:29:45	0
1813	1	2012-03-24 15:34:23	2012-05-23 15:34:00	12	2012-03-25 14:01:49	0
1814	5	2012-03-24 15:11:45	2012-05-23 15:11:00	24	2012-03-29 11:20:57	0
1815	2	2012-03-24 19:39:04	2012-03-28 16:39:00	10	2012-03-27 03:02:33	0
1816	1	2012-03-24 22:48:44	2012-05-23 22:48:00	12	2012-03-25 13:07:39	0
1817	6	2012-03-24 22:58:43	2012-03-27 08:57:45	24		0
1818	11	2012-03-24 22:16:03	2012-05-23 22:16:00	1	2012-04-01 09:53:38	6
1819	6	2012-03-24 22:44:39	2012-05-23 22:44:00	24	2012-03-27 11:02:22	0
1820	1	2012-03-25 00:57:00	2012-05-24 00:57:00	8	2012-03-25 14:47:02	0
1821	6	2012-03-25 00:52:21	2012-03-27 04:51:46	24		0
1822	3	2012-03-25 00:32:29	2012-05-24 00:32:00	24	2012-03-26 12:42:33	0
1823	8	2012-03-25 08:02:19	2012-05-24 08:02:00	3	2012-03-30 08:27:23	0
1824	4	2012-03-25 08:33:27	2012-03-27 23:33:00	12	2012-03-27 11:38:59	0
1825	5	2012-03-25 09:27:52	2012-05-24 09:27:00	24	2012-03-27 12:56:57	0
1826	5	2012-03-25 14:24:29	2012-05-24 14:24:00	24	2012-03-29 08:28:01	0
1827	2	2012-03-25 14:53:17	2012-05-24 14:53:00	10	2012-03-27 11:53:08	0
1828	6	2012-03-25 16:21:42	2012-05-24 16:21:00	24	2012-04-07 08:27:38	0
1829	1	2012-03-25 17:57:12	2012-05-24 17:57:00	12	2012-03-26 06:08:02	0
1830	2	2012-03-25 17:07:57	2012-03-28 02:07:39	10		0
1831	1	2012-03-25 18:49:31	2012-05-24 18:49:00	12	2012-03-26 13:49:07	0
1832	6	2012-03-25 20:15:13	2012-03-29 11:15:04	24		0
1833	5	2012-03-25 20:22:34	2012-05-24 20:22:00	24	2012-03-28 11:35:33	0
1834	6	2012-03-25 23:10:08	2012-03-30 13:09:15	24		0
1835	11	2012-03-26 04:33:11	2012-05-25 04:33:00	1	2012-04-02 10:26:12	3
1836	1	2012-03-26 08:05:02	2012-05-25 08:05:00	8	2012-03-27 08:23:15	0
1837	2	2012-03-26 08:43:33	2012-03-29 22:43:18	10		0
1838	6	2012-03-26 09:28:49	2012-05-25 09:28:00	24	2012-03-29 15:07:52	0
1839	8	2012-03-26 09:02:07	2012-05-25 09:02:00	3	2012-03-30 11:30:39	1
1840	7	2012-03-26 09:49:23	2012-05-25 09:49:00	24	2012-03-29 07:07:43	0
1841	5	2012-03-26 09:52:38	2012-05-25 09:52:00	24	2012-03-28 13:17:24	0
1842	8	2012-03-26 09:54:07	2012-05-25 09:54:00	3	2012-03-29 21:41:50	1
1843	7	2012-03-26 10:46:48	2012-03-28 12:46:43	24		0
1844	4	2012-03-26 10:12:05	2012-05-25 10:12:00	12	2012-03-29 15:33:27	0
1845	4	2012-03-26 10:32:00	2012-05-25 10:32:00	12	2012-03-28 16:17:40	0
1846	2	2012-03-26 12:02:23	2012-05-25 12:02:00	10	2012-03-27 15:08:52	0
1847	5	2012-03-26 12:18:26	2012-03-29 00:17:49	24		0
1848	1	2012-03-26 13:43:17	2012-03-28 20:42:52	12		0
1849	7	2012-03-26 13:26:15	2012-05-25 13:26:00	24	2012-04-11 16:26:21	0
1850	1	2012-03-26 15:35:38	2012-05-25 15:35:00	12	2012-03-27 12:35:31	0
1851	1	2012-03-26 16:22:15	2012-05-25 16:22:00	8	2012-03-27 10:29:21	0
1852	1	2012-03-26 17:09:54	2012-05-25 17:09:00	12	2012-03-27 17:49:10	0
1853	2	2012-03-26 17:21:28	2012-05-25 17:21:00	10	2012-03-27 09:09:53	0
1854	1	2012-03-26 17:12:53	2012-05-25 17:12:00	8	2012-03-27 11:58:40	0
1855	8	2012-03-26 18:21:05	2012-05-25 18:21:00	3	2012-04-02 18:06:36	2
1856	2	2012-03-26 19:09:58	2012-05-25 19:09:00	10	2012-03-28 03:54:23	0
1857	1	2012-03-26 20:29:36	2012-05-25 20:29:00	12	2012-03-27 23:50:15	0
1858	4	2012-03-26 21:22:19	2012-05-25 21:22:00	12	2012-03-28 17:17:49	0
1859	2	2012-03-26 23:06:45	2012-05-25 23:06:00	10	2012-03-28 08:32:09	0
1860	7	2012-03-27 01:07:55	2012-05-26 01:07:00	24	2012-03-29 15:25:14	0
1861	6	2012-03-27 03:13:33	2012-05-26 03:13:00	24	2012-04-18 17:21:41	0
1862	6	2012-03-27 03:03:53	2012-03-31 15:03:00	24		0
1863	1	2012-03-27 05:20:51	2012-05-26 05:20:00	8	2012-03-27 09:42:23	0
1864	2	2012-03-27 07:29:24	2012-05-26 07:29:00	10	2012-03-29 11:53:40	0
1865	3	2012-03-27 08:05:41	2012-05-26 08:05:00	24	2012-03-29 19:48:04	0
1866	5	2012-03-27 08:15:04	2012-05-26 08:15:00	24	2012-03-29 13:06:59	0
1867	9	2012-03-27 09:14:02	2012-05-26 09:14:00	5	2012-03-30 16:33:53	0
1868	9	2012-03-27 09:41:58	2012-05-26 09:41:00	5	2012-03-30 11:42:49	0
1869	8	2012-03-27 09:22:12	2012-05-26 09:22:00	3	2012-03-30 11:18:21	0
1870	9	2012-03-27 09:31:41	2012-05-26 09:31:00	5	2012-03-30 11:12:54	0
1871	4	2012-03-27 10:45:56	2012-05-26 10:45:00	12	2012-03-30 12:33:50	0
1872	2	2012-03-27 11:31:03	2012-05-26 11:31:00	10	2012-03-28 12:58:31	0
1873	2	2012-03-27 11:09:12	2012-05-26 11:09:00	10	2012-03-28 12:07:25	0
1874	1	2012-03-27 11:35:16	2012-03-30 16:35:00	8	2012-03-28 10:24:01	0
1875	1	2012-03-27 14:32:24	2012-05-26 14:32:00	12	2012-03-28 20:13:57	0
1876	2	2012-03-27 14:15:38	2012-05-26 14:15:00	10	2012-03-28 15:38:48	0
1877	1	2012-03-27 15:20:46	2012-05-26 15:20:00	12	2012-03-28 11:06:23	0
1878	1	2012-03-27 15:37:12	2012-05-26 15:37:00	12	2012-03-29 00:21:16	0
1879	1	2012-03-27 16:05:57	2012-05-26 16:05:00	8	2012-03-28 07:32:00	0
1880	1	2012-03-27 16:50:27	2012-03-30 10:50:11	12		0
1881	1	2012-03-27 18:33:54	2012-05-26 18:33:00	8	2012-03-28 10:14:28	0
1882	7	2012-03-27 19:43:11	2012-05-26 19:43:00	24	2012-04-05 12:04:10	0
1883	1	2012-03-27 19:53:53	2012-04-01 02:53:11	12		0
1884	4	2012-03-27 19:31:40	2012-05-26 19:31:00	12	2012-03-31 08:37:28	0
1885	2	2012-03-27 19:52:15	2012-05-26 19:52:00	10	2012-03-29 08:51:59	0
1886	1	2012-03-27 20:23:00	2012-05-26 20:23:00	12	2012-03-28 13:09:03	0
1887	1	2012-03-28 00:46:10	2012-05-27 00:46:00	8	2012-03-28 08:04:04	0
1888	1	2012-03-28 01:45:41	2012-03-31 04:45:00	12	2012-03-29 09:57:30	0
1889	1	2012-03-28 03:03:51	2012-05-27 03:03:00	8	2012-03-29 08:38:16	0
1890	1	2012-03-28 07:30:19	2012-05-27 07:30:00	8	2012-03-29 17:07:48	0
1891	3	2012-03-28 08:48:39	2012-05-27 08:48:00	24	2012-03-30 11:13:34	0
1892	6	2012-03-28 08:21:40	2012-05-27 08:21:00	24	2012-04-01 08:28:14	0
1893	4	2012-03-28 08:00:20	2012-05-27 08:00:00	12	2012-03-30 08:29:51	0
1894	1	2012-03-28 10:37:01	2012-05-27 10:37:00	8	2012-03-29 10:33:56	0
1895	2	2012-03-28 10:52:30	2012-03-31 04:51:58	10		0
1896	1	2012-03-28 10:20:15	2012-05-27 10:20:00	8	2012-03-29 12:09:58	0
1897	3	2012-03-28 11:21:30	2012-05-27 11:21:00	24	2012-03-31 08:50:51	0
1898	8	2012-03-28 11:34:36	2012-05-27 11:34:00	3	2012-04-04 16:23:27	0
1899	2	2012-03-28 11:09:28	2012-05-27 11:09:00	10	2012-03-29 12:04:49	0
1900	2	2012-03-28 12:45:55	2012-04-01 00:45:00	10	2012-03-29 11:30:08	0
1901	1	2012-03-28 12:09:42	2012-05-27 12:09:00	12	2012-03-29 11:00:36	0
1902	1	2012-03-28 12:21:11	2012-05-27 12:21:00	12	2012-03-29 14:38:53	0
1903	1	2012-03-28 13:53:49	2012-03-30 21:53:15	12		0
1904	1	2012-03-28 14:11:48	2012-04-02 08:11:00	12	2012-03-29 18:20:50	0
1905	1	2012-03-28 15:45:30	2012-03-31 04:44:41	8		0
1906	1	2012-03-28 16:13:01	2012-05-27 16:13:00	8	2012-03-29 11:05:18	0
1907	2	2012-03-28 17:12:20	2012-05-27 17:12:00	10	2012-03-29 10:56:54	0
1908	2	2012-03-28 17:19:06	2012-05-27 17:19:00	10	2012-03-30 10:46:33	0
1909	2	2012-03-28 17:38:15	2012-05-27 17:38:00	10	2012-03-30 06:23:44	0
1910	11	2012-03-28 17:08:08	2012-05-27 17:08:00	1	2012-04-04 09:14:38	2
1911	4	2012-03-28 18:25:32	2012-05-27 18:25:00	12	2012-03-30 14:33:44	0
1912	1	2012-03-28 18:25:26	2012-05-27 18:25:00	8	2012-03-28 22:39:14	0
1913	1	2012-03-28 18:33:10	2012-05-27 18:33:00	12	2012-03-29 15:27:12	0
1914	6	2012-03-28 20:44:44	2012-05-27 20:44:00	24	2012-04-09 10:11:03	0
1915	3	2012-03-29 07:22:56	2012-05-28 07:22:00	24	2012-03-31 14:41:32	0
1916	6	2012-03-29 08:52:54	2012-05-28 08:52:00	24	2012-04-02 16:26:36	0
1917	7	2012-03-29 12:58:15	2012-04-02 02:58:00	24		0
1918	7	2012-03-29 12:12:23	2012-05-28 12:12:00	24	2012-04-25 09:20:08	0
1919	1	2012-03-29 13:39:34	2012-05-28 13:39:00	8	2012-03-30 14:07:50	0
1920	2	2012-03-29 13:12:57	2012-05-28 13:12:00	10	2012-03-30 11:15:55	0
1921	1	2012-03-29 14:19:07	2012-04-01 04:18:52	8		0
1922	2	2012-03-29 14:54:50	2012-05-28 14:54:00	10	2012-03-30 08:29:44	0
1923	2	2012-03-29 14:11:18	2012-04-01 10:10:42	10		0
1924	2	2012-03-29 16:15:56	2012-05-28 16:15:00	10	2012-03-30 15:40:41	0
1925	2	2012-03-29 17:07:23	2012-05-28 17:07:00	10	2012-03-31 07:24:49	0
1926	2	2012-03-29 17:08:50	2012-05-28 17:08:00	10	2012-03-31 14:16:08	0
1927	11	2012-03-29 17:43:06	2012-05-28 17:43:00	1	2012-04-05 14:00:02	3
1928	6	2012-03-29 18:43:02	2012-05-28 18:43:00	24	2012-04-02 11:55:17	0
1929	8	2012-03-29 18:27:28	2012-05-28 18:27:00	3	2012-04-03 15:04:05	0
1930	2	2012-03-29 19:23:06	2012-05-28 19:23:00	10	2012-03-31 08:50:12	0
1931	2	2012-03-29 19:16:42	2012-05-28 19:16:00	10	2012-03-31 08:22:37	0
1932	2	2012-03-29 19:35:24	2012-05-28 19:35:00	10	2012-03-31 08:57:58	0
1933	1	2012-03-29 19:06:25	2012-05-28 19:06:00	12	2012-03-30 08:05:13	0
1934	1	2012-03-29 20:55:43	2012-05-28 20:55:00	8	2012-03-29 23:06:40	0
1935	1	2012-03-29 22:33:51	2012-05-28 22:33:00	8	2012-03-30 06:45:22	0
1936	5	2012-03-29 22:39:04	2012-05-28 22:39:00	24	2012-03-31 11:19:50	0
1937	6	2012-03-29 23:56:38	2012-05-28 23:56:00	24	2012-04-02 20:37:43	0
1938	2	2012-03-30 08:07:30	2012-05-29 08:07:00	10	2012-03-31 16:12:15	0
1939	3	2012-03-30 08:27:02	2012-05-29 08:27:00	24	2012-04-01 13:02:56	0
1940	5	2012-03-30 09:29:04	2012-05-29 09:29:00	24	2012-04-01 10:30:56	0
1941	2	2012-03-30 10:30:32	2012-05-29 10:30:00	10	2012-03-31 10:39:10	0
1942	7	2012-03-30 10:11:29	2012-05-29 10:11:00	24	2012-04-15 13:01:04	0
1943	8	2012-03-30 11:15:16	2012-05-29 11:15:00	3	2012-04-06 12:15:53	0
1944	1	2012-03-30 11:46:13	2012-05-29 11:46:00	12	2012-03-31 10:02:45	0
1945	2	2012-03-30 11:24:56	2012-05-29 11:24:00	10	2012-03-31 12:03:39	0
1946	2	2012-03-30 11:23:47	2012-05-29 11:23:00	10	2012-03-31 09:11:31	0
1947	3	2012-03-30 11:46:08	2012-05-29 11:46:00	24	2012-04-02 12:15:18	0
1948	2	2012-03-30 11:28:37	2012-05-29 11:28:00	10	2012-03-31 10:55:42	0
1949	2	2012-03-30 12:51:42	2012-05-29 12:51:00	10	2012-03-31 11:28:30	0
1950	6	2012-03-30 12:12:13	2012-05-29 12:12:00	24	2012-04-06 16:58:07	0
1951	1	2012-03-30 13:57:22	2012-05-29 13:57:00	8	2012-03-31 11:08:16	0
1952	1	2012-03-30 14:47:43	2012-04-01 20:46:50	12		0
1953	4	2012-03-30 15:58:33	2012-04-03 21:58:15	12		0
1954	1	2012-03-30 15:29:51	2012-05-29 15:29:00	8	2012-03-31 21:20:17	0
1955	4	2012-03-30 15:36:03	2012-05-29 15:36:00	12	2012-04-02 14:29:34	0
1956	6	2012-03-30 18:14:53	2012-05-29 18:14:00	24	2012-04-03 07:12:38	0
1957	1	2012-03-30 18:40:12	2012-05-29 18:40:00	12	2012-03-31 17:22:47	0
1958	8	2012-03-30 18:29:54	2012-05-29 18:29:00	3	2012-04-04 13:35:56	1
1959	2	2012-03-30 19:03:19	2012-05-29 19:03:00	10	2012-04-02 00:08:17	0
1960	6	2012-03-30 22:41:07	2012-05-29 22:41:00	24	2012-04-03 16:55:56	0
1961	6	2012-03-30 22:24:44	2012-05-29 22:24:00	24	2012-04-02 14:39:52	0
1962	4	2012-03-31 09:47:15	2012-05-30 09:47:00	12	2012-04-01 15:25:10	0
1963	2	2012-03-31 09:50:17	2012-05-30 09:50:00	10	2012-03-31 12:18:05	0
1964	3	2012-03-31 10:51:47	2012-05-30 10:51:00	24	2012-04-02 12:05:30	0
1965	2	2012-03-31 10:00:10	2012-05-30 10:00:00	10	2012-04-01 17:06:32	0
1966	2	2012-03-31 10:10:26	2012-05-30 10:10:00	10	2012-04-01 10:01:14	0
1967	1	2012-03-31 11:13:10	2012-05-30 11:13:00	12	2012-04-01 10:46:41	0
1968	1	2012-03-31 12:31:20	2012-05-30 12:31:00	12	2012-04-01 09:18:57	0
1969	1	2012-03-31 12:58:15	2012-05-30 12:58:00	8	2012-03-31 21:51:58	0
1970	2	2012-03-31 14:26:42	2012-05-30 14:26:00	10	2012-04-01 16:52:22	0
1971	3	2012-03-31 14:57:43	2012-05-30 14:57:00	24	2012-04-03 15:18:39	0
1972	1	2012-03-31 14:14:22	2012-04-05 10:14:00	12	2012-04-01 15:53:10	0
1973	3	2012-03-31 15:15:41	2012-05-30 15:15:00	24	2012-04-02 21:47:49	0
1974	1	2012-03-31 16:31:52	2012-04-03 01:31:35	12		0
1975	1	2012-03-31 16:48:26	2012-05-30 16:48:00	8	2012-04-01 09:08:47	0
1976	2	2012-03-31 17:52:52	2012-05-30 17:52:00	10	2012-04-01 11:54:30	0
1977	1	2012-03-31 18:45:49	2012-05-30 18:45:00	12	2012-04-01 14:14:36	0
1978	6	2012-03-31 18:02:13	2012-04-05 05:02:00	24	2012-04-04 13:03:57	0
1979	6	2012-03-31 18:06:29	2012-05-30 18:06:00	24	2012-04-04 12:26:42	0
1980	1	2012-03-31 20:07:12	2012-05-30 20:07:00	8	2012-03-31 23:18:40	0
1981	11	2012-03-31 21:11:54	2012-05-30 21:11:00	1	2012-04-07 21:04:03	3
1982	3	2012-04-01 03:28:00	2012-04-05 17:27:07	24		0
1983	3	2012-04-01 03:02:36	2012-05-31 03:02:00	24	2012-04-02 09:50:51	0
1984	6	2012-04-01 04:01:54	2012-05-31 04:01:00	24	2012-04-03 03:51:47	0
1985	5	2012-04-01 07:39:13	2012-05-31 07:39:00	24	2012-04-04 10:53:08	0
1986	1	2012-04-01 09:48:25	2012-05-31 09:48:00	8	2012-04-02 13:01:54	0
1987	1	2012-04-01 09:52:30	2012-05-31 09:52:00	8	2012-04-01 11:44:09	0
1988	4	2012-04-01 10:33:16	2012-05-31 10:33:00	12	2012-04-04 10:40:43	0
1989	7	2012-04-01 10:32:48	2012-04-05 13:32:00	24		0
1990	1	2012-04-01 11:29:04	2012-04-04 02:29:00	8	2012-04-02 09:13:52	0
1991	3	2012-04-01 11:57:26	2012-04-04 00:56:26	24		0
1992	2	2012-04-01 11:54:00	2012-05-31 11:54:00	10	2012-04-02 09:50:14	0
1993	3	2012-04-01 12:50:52	2012-05-31 12:50:00	24	2012-04-03 12:25:11	0
1994	2	2012-04-01 12:31:32	2012-05-31 12:31:00	10	2012-04-02 07:04:17	0
1995	1	2012-04-01 12:23:52	2012-05-31 12:23:00	8	2012-04-02 17:00:01	0
1996	5	2012-04-01 12:03:51	2012-05-31 12:03:00	24	2012-04-05 12:16:26	0
1997	7	2012-04-01 13:57:34	2012-04-04 09:57:07	24		0
1998	6	2012-04-01 13:04:23	2012-05-31 13:04:00	24	2012-04-08 11:24:18	0
1999	4	2012-04-01 13:19:12	2012-04-04 19:18:46	12		0
[truncated: 6,344 more rows]

## Sheet: Drugs-Prices
Drug ID	Drug name	price per dose
1	VANCOMYCIN IVPB (1000-1500MG) *SH*	6.79433
2	PANTOPRAZOLE INFUSION *SH*	8.496
3	FUROSEMIDE INFUSION *S*	4.35192
4	LEVETIRACETAM IVPB *SH*	17.3767
5	NOREPINEPHRINE INFUSION *SH*	6.758
6	VASOPRESSIN INFUSION *SH*	8.4525
7	LEVOTHYROXINE SODIUM 100 MCG IV SOLR *SH*	31.0993
8	CITRATE TRI SODIUM 0_5% 3191 ML *S*	0.899947
9	PRISMASATE B22GK 4/0 *S*	28.37
10	SODIUM BICARBONATE +/- KCL CVVH OOSQ *S*	2.5716
11	NS +/-CALCIUM +/- POTASSIUM (CVVH NON-CITRATE) *S*	1
